# Supplementary material for: Rh-Catalyzed cascade C–H activation/C–C cleavage/cyclization of carboxylic acids with cyclopropanols
Source: Royal Society of Chemistry journal article supplement (doi:10.1039/d1cc01778k), 2021-01-01
Supplement: d1cc01778k1.pdf [file d1cc01778k1.pdf]

# **Rh-catalyzed Cascade C–H Activation/C–C Cleavage/Cyclization of Carboxylic Acids with Cyclopropanols**

Siqi Wang,<sup>†‡</sup> Erfei Miao,<sup>†‡</sup> Hao Wang,<sup>†‡</sup> Bichao Song,<sup>†‡</sup> Wei Huang,<sup>\*†‡§</sup> Weibo Yang<sup>\*†‡§</sup>

<sup>†</sup>CAS Key Laboratory of Receptor Research, CAS Center for Excellence in Molecular Cell Science, Shanghai Institute of Materia Medica, Chinese Academy of Sciences, 555 Zuchongzhi Road, Pudong, Shanghai 201203, China

<sup>‡</sup>University of Chinese Academy of Sciences, No.19A Yuquan Road, Beijing 100049, China

<sup>§</sup>School of Pharmaceutical Science and Technology, Hangzhou Institute of Advanced Study, Hangzhou 310024, China.

## **Contents:**

Page 3: General comments

Page 4: General procedure to the preparation of Cyclopropanols

Page 4: Synthesis of several starting materials

Page 6: General procedure for C-H activation

Page 7: The potential utility of the reaction

Page 10: X-ray molecular structure and crystallographic data

Page 13: Mechanistic studies

Page 17: Characterization data of compounds

Page 79: References

## General Remark

All chemicals were obtained from commercial suppliers and were used as received unless otherwise noted.  $^1\text{H}$  and  $^{13}\text{C}$  NMR spectra were recorded using  $\text{CDCl}_3$  as a solvent on a Bruker 500 or 600 MHz NMR spectrometer. The chemical shift is given in dimensionless  $\delta$  values and is referenced relative to TMS in  $^1\text{H}$  and  $^{13}\text{C}$  NMR spectroscopy. High resolution mass spectra were obtained on a Waters Xevo G2-XS QTOF or an Agilent 6230 LC-TOF MS spectrometer. The compounds were analyzed using a Waters C18 column (ACQUITY UPLC BEH C18, 1.7  $\mu\text{m}$ , 2.1 x 50 mm) and eluted with 70% methanol containing 0.1% formic acid. Mass spectra of small molecule were recorded in the mass range of 200-3000 or 600-2000 under high resolution mass-spec mode (HRMS, standard 3200 m/z, 4 GHz). Key source parameters: drying nitrogen gas flow of 11 L/min; nebulizer pressure of 40 psi; gas temperature of 35  $^\circ\text{C}$ ; fragmenter voltage of 175 V; skimmer voltage of 65 V; and capillary voltage of 4000 V. Column chromatography was performed on silica gel (200-300 mesh) with freshly distilled ethyl acetate (EA) and petroleum ether (PE).

## General procedure to the preparation of cyclopropanols

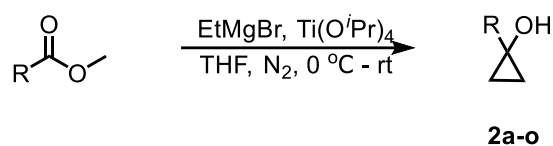

Cyclopropanols were synthesized according to literature procedure<sup>1</sup>. Under the protection of nitrogen, EtMgBr (2.8 equiv., 1 M in THF, 28 mL) was slowly added to a solution of the ester (10.0 mmol) and Ti(O<sup>*i*</sup>Pr)<sub>4</sub> (14.0 mmol, 4.3 mL) in 6 mL of anhydrous THF at 0 °C over 30 min. The dark mixture was warmed to room temperature and allowed to stir overnight. Then 5 mL of water was slowly added to quench the reaction. After the precipitate was removed by filtration, the filtrate was extracted by Et<sub>2</sub>O (20 mL × 3) and the combined organic phase was dried over anhydrous Na<sub>2</sub>SO<sub>4</sub>. The crude products were purified by column chromatography (PE/EA = 1/1 to 20/1) to afford the pure cyclopropanols.

## Synthesis of several starting materials

### Preparation of 2p

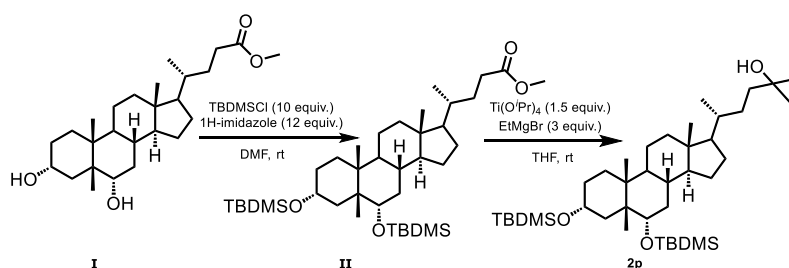

Preparation of **II**: 1H-imidazole (2.5 g, 36 mmol) and *t*-butyldimethylsilyl chloride (TBDMSCl) (4.5 g, 30 mmol) were added to a solution of methyl hyodeoxycholate (1.2 g, 3 mmol) in 3 mL of anhydrous DMF. The mixture was allowed to stir overnight at room temperature. Aqueous NaCl was added and the mixture was extracted with ethyl acetate (5 mL × 3). Combined organic phase was dried over anhydrous Na<sub>2</sub>SO<sub>4</sub>. The

crude products were purified by column chromatography (PE/EA = 80/1) to afford the pure product **II** (1.22 g, 63%).

Preparation of **2p**: Under the protection of nitrogen, EtMgBr (9 mmol, 1M in THF, 9mL) was dropwise added to a solution of **II** (2 mmol, 1.2 g) and Ti(O<sup>i</sup>Pr)<sub>4</sub> (3 mmol, 1.5 mL) in 40 mL of anhydrous THF at 0 °C over 30 min. The dark mixture was warmed to room temperature and allowed to stir overnight. Then 10 mL of water was slowly added to quench the reaction. After the precipitate was removed by filtration, the filtrate was extracted by Et<sub>2</sub>O (20 mL × 3) and the combined organic phase was dried over anhydrous Na<sub>2</sub>SO<sub>4</sub>. The crude products were purified by column chromatography (PE/EA = 20/1) to afford the product **2p** (0.816 g, 67%).

### Preparation of **2q**

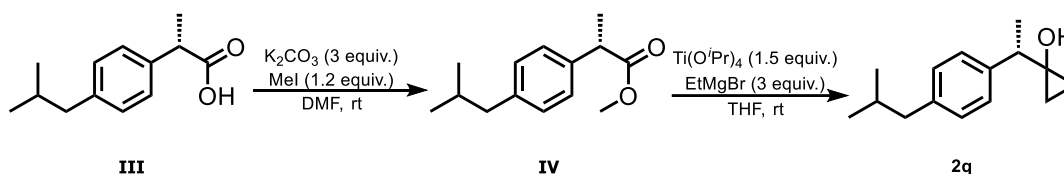

Preparation of **IV**: MeI (1.2 equiv.) was added to a solution of *S*(+)-Ibuprofen (1.03 g, 5 mmol) and K<sub>2</sub>CO<sub>3</sub> (3 equiv.) in DMF (10 mL) at room temperature. The mixture was allowed to stir overnight at room temperature. After pouring 10 mL of water, the mixture was extracted by EtOAc (10 mL × 3). The combined organic layer was washed by brine and dried over anhydrous Na<sub>2</sub>SO<sub>4</sub>. The residue was purified by silica gel chromatography using PE/EA (10/1) to obtain pure compound **IV** (95%, 1.05 g).

Preparation of **2q**: According to the general procedure to the preparation of cyclopropanes, the pure **2q** was obtained in 90% yield (933 mg).

### Preparation of **1s**

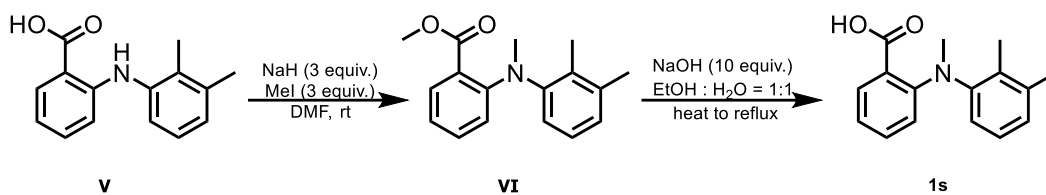

Preparation of **VI**: NaH (600 mg, 60% in mineral oil, 15 mmol) was added to a solution of mefenamic acid (1.21 g, 5 mmol) in DMF (10 mL) in an ice-water bath. The mixture was stirred for 30 minutes followed by the addition of MeI (933 $\mu$ L, 15 mmol). Then the resulting mixture was stirred at room temperature overnight. After pouring 10 mL of water, the mixture was extracted by EtOAc (10 mL  $\times$  3). The combined organic layer was washed by brine and dried over anhydrous Na<sub>2</sub>SO<sub>4</sub>. The residue was purified by silica gel chromatography using PE/EA (10/1) to obtain pure compound **VI** (1.30 g, 96%).

Preparation of **1s**: The pure compound **VI** was hydrolyzed with sodium hydroxide (10 equiv.) in a solution of 1:1 ethanol/water heated to reflux for 24 h. Then the mixture was cooled down to room temperature and was acidified with 1 M HCl to pH = 1, followed by extracting with EtOAc. The combined organic layer was washed with brine and dried over anhydrous Na<sub>2</sub>SO<sub>4</sub>. The residue was purified by silica gel chromatography using PE/EA (from 10/1 to 1/1) to obtain pure compound (1.20 g, 98%).

## General procedure for C-H activation

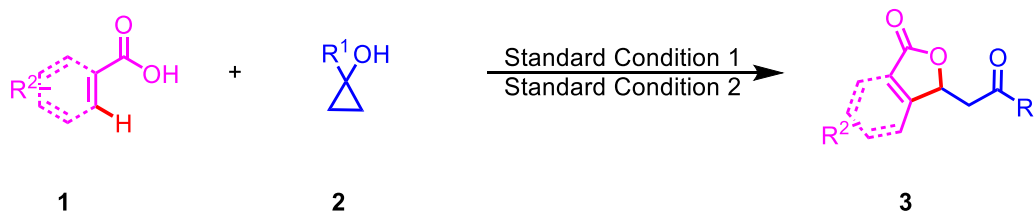

### Standard Condition 1

A teflon-capped vial was charged with the benzoic acids (0.1 mmol, 1.0 equiv.), cyclopropanols (0.25 mmol, 2.5 equiv.), Cs<sub>2</sub>CO<sub>3</sub> (0.1 mmol, 1 equiv.), [Cp\* $\text{RhCl}_2$ ]<sub>2</sub> (4 mol%), AgOAc (2 equiv.), 4Å Ms (10 mg) under an air atmosphere. The reaction

mixture was stirred at 80 °C for 24 h. After that, the mixture was cooled down and was extracted with EtOAc. The organic layers were combined, filtered through a pad of Celite and concentrated *in vacuo*. The residue was purified by silica gel chromatography using EA/PE to afford compounds.

#### Standard Condition 2

A teflon-capped vial was charged with the benzoic acids (0.1 mmol, 1.0 equiv.), cyclopropanols (0.25 mmol, 2.5 equiv.), K<sub>3</sub>PO<sub>4</sub> (0.1 mmol, 1 equiv.), [Cp\*RhCl<sub>2</sub>]<sub>2</sub> (4 mol%), AgOAc (2 equiv.), 4Å Ms (10 mg) under an air atmosphere. The reaction mixture was stirred at 80 °C for 24 h. After that, the mixture was cooled down and was extracted with EtOAc. The organic layers were combined, filtered through a pad of Celite and concentrated *in vacuo*. The residue was purified by silica gel chromatography using EA/PE to afford compounds.

### The potential utility of the reaction

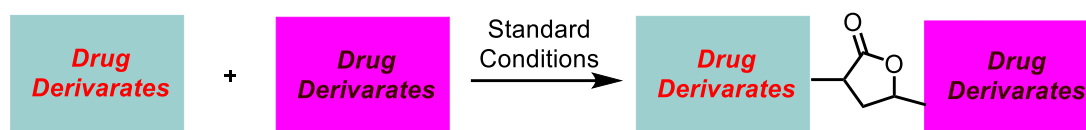

### Preparation of 3pa

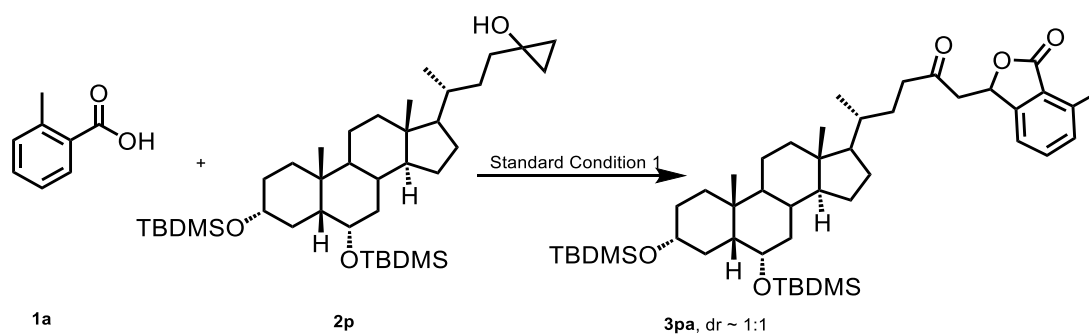

A teflon-capped vial was charged with the **1a** (13.6 mg, 0.1 mmol, 1.0 equiv.), **2p** (25µL, 0.25 mmol, 2.5 equiv.), Cs<sub>2</sub>CO<sub>3</sub> (33mg, 0.1 mmol, 1 equiv.), [Cp\*RhCl<sub>2</sub>]<sub>2</sub> (2.5

mg, 4 mol%), AgOAc (34 mg, 2 equiv.), 4Å Ms (10 mg) under an air atmosphere. The reaction mixture was stirred at 80 °C for 48 h. After that, the mixture was cooled down and was extracted with EtOAc. The organic layers were combined, filtered through a pad of Celite and concentrated *in vacuo*. The residue was purified by silica gel chromatography using EA/PE to afford pure compound **3pa** (30 mg) in 40% isolated yield and the value of dr is 1:1.

### Preparation of 3ar

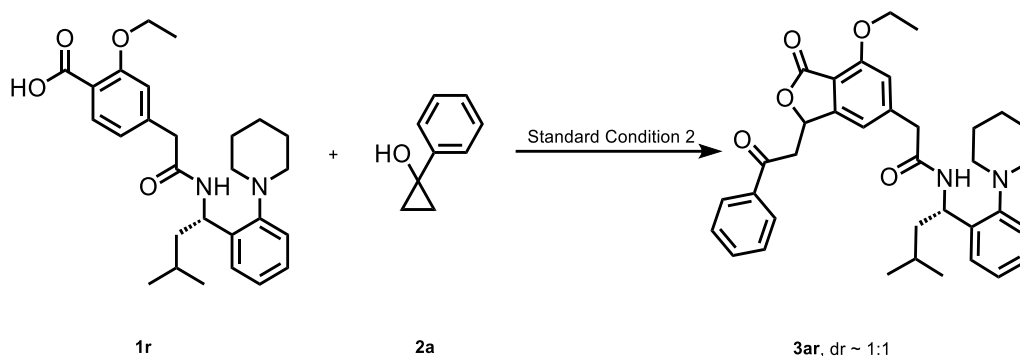

A teflon-capped vial was charged with the **1r** (45.2 mg, 0.1 mmol, 1.0 equiv.), **2a** (25  $\mu$ L, 0.25 mmol, 2.5 equiv.), K<sub>3</sub>PO<sub>4</sub> (21.2 mg, 0.1 mmol, 1 equiv.), [Cp\**Rh*Cl<sub>2</sub>]<sub>2</sub> (2.5 mg, 4 mol%), AgOAc (34 mg, 2 equiv.), 4Å Ms (10 mg) under an air atmosphere. The reaction mixture was stirred at 80 °C for 24 h. After that, the mixture was cooled down and was extracted with EtOAc. The organic layers were combined, filtered through a pad of Celite and concentrated *in vacuo*. The residue was purified by silica gel chromatography using EA/PE to afford pure compound **3ar** (23 mg) in 40% isolated yield and the value of dr is 1:1.

### Preparation of 4



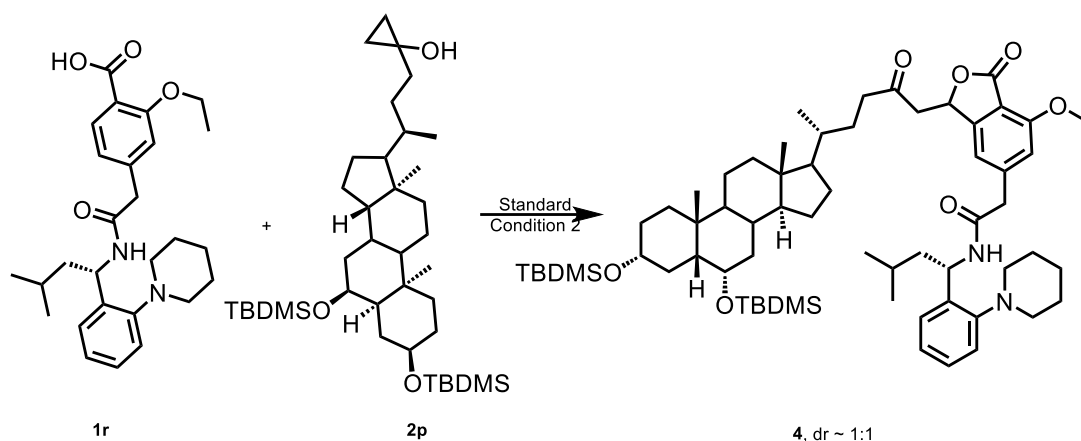

A teflon-capped vial was charged with the **1r** (45.2 mg, 0.1 mmol, 1.0 equiv.), **2q** (158 mg, 0.25 mmol, 2.5 equiv.),  $K_3PO_4$  (21.2 mg, 0.1 mmol, 1 equiv.),  $[Cp^*RhCl_2]_2$  (2.5 mg, 4 mol%),  $AgOAc$  (34 mg, 2 equiv.),  $4\text{\AA}$  Ms (10 mg) under an air atmosphere. The reaction mixture was stirred at 80 °C for 24 h. After that, the mixture was cooled down and was extracted with EtOAc. The organic layers were combined, filtered through a pad of Celite and concentrated *in vacuo*. The residue was purified by silica gel chromatography using EA/PE to afford pure compound **4** (40 mg) in 37% isolated yield and the value of dr is 1:1.

### Preparation of 5

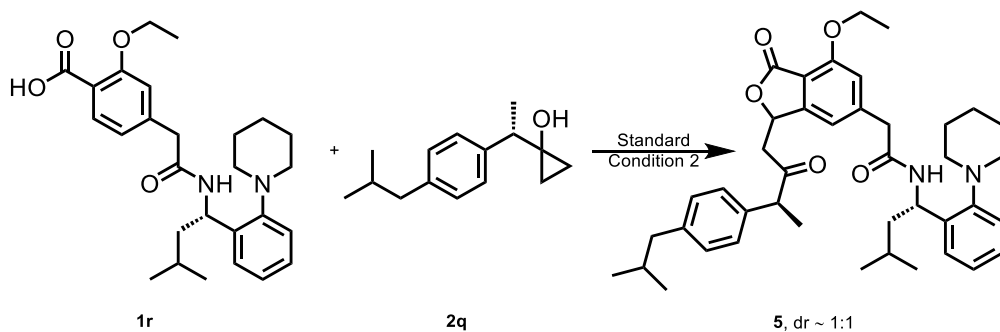

A teflon-capped vial was charged with the **1r** (45.2 mg, 0.1 mmol, 1.0 equiv.), **2q** (54.6 mg, 0.25 mmol, 2.5 equiv.),  $K_3PO_4$  (21.2 mg, 0.1 mmol, 1 equiv.),  $[Cp^*RhCl_2]_2$  (2.5 mg, 4 mol%),  $AgOAc$  (34 mg, 2 equiv.),  $4\text{\AA}$  Ms (10 mg) under an air atmosphere. The reaction mixture was stirred at 80 °C for 24 h. After that, the mixture was cooled down and was extracted with EtOAc. The organic layers were combined, filtered

through a pad of Celite and concentrated *in vacuo*. The residue was purified by silica gel chromatography using EA/PE to afford pure compound **5** (51 mg) in 77% isolated yield and 1:1 dr value.

### Preparation of **6**

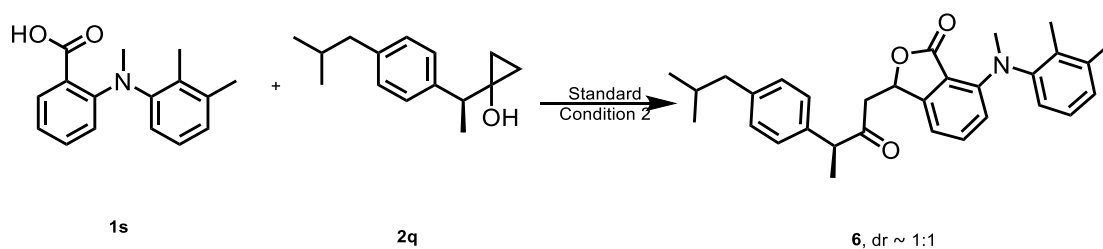

A teflon-capped vial was charged with the **1s** (25.5 mg, 0.1 mmol, 1.0 equiv.), **2q** (54.6 mg, 0.25 mmol, 2.5 equiv.),  $K_3PO_4$  (21.2 mg, 0.1 mmol, 1 equiv.),  $[Cp^*RhCl_2]_2$  (2.5 mg, 4 mol%),  $AgOAc$  (34 mg, 2 equiv.), 4Å Ms (10 mg) under an air atmosphere. The reaction mixture was stirred at 80 °C for 24 h. After that, the mixture was cooled down and was extracted with EtOAc. The organic layers were combined, filtered through a pad of Celite and concentrated *in vacuo*. The residue was purified by silica gel chromatography using EA/PE to afford pure compound **6** (42 mg) in 90% isolated yield and the value of dr is 1:1.

### Reaction in gram scale of **5**

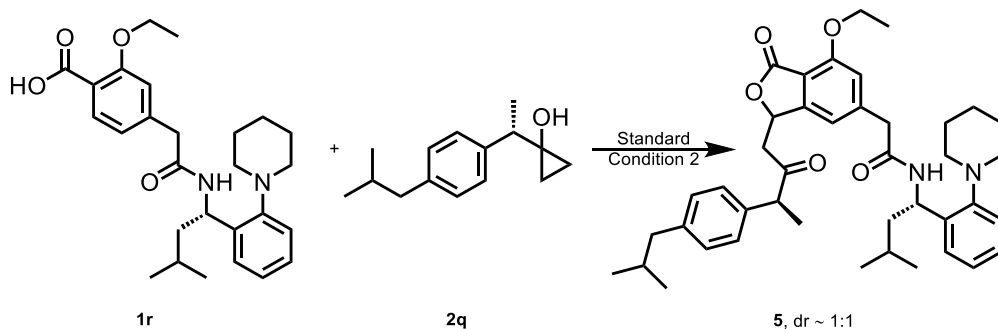

To the solution of the **1r** (2.26 g, 5 mmol, 1 equiv.), **2q** (2.73 g, 12.5 mmol, 2.5 equiv.), [Cp\*RhCl<sub>2</sub>]<sub>2</sub> (125 mg, 4 mol %), AgOAc (1.7 g, 2 equiv.), K<sub>3</sub>PO<sub>4</sub> (1.06 g, 1 equiv.) was added in MeCN (50 mL). The solution was stirred at 80 °C for 24 hours. After that, the mixture was cooled down and the mixture was extracted with EtOAc. The organic layers were combined, filtered through a pad of Celite and concentrated *in vacuo*. The residue was purified by silica gel chromatography using EA/PE to afford compound **5** (2.43 g) in 73% isolated yield and the value of dr is 1:1.

### X-ray molecular structure and crystallographic data

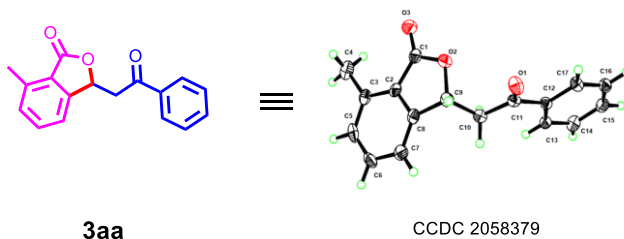

|                                    |                                                               |
|------------------------------------|---------------------------------------------------------------|
| Empirical formula                  | C <sub>17</sub> H <sub>14</sub> O <sub>3</sub>                |
| Formula weight                     | 266.28                                                        |
| Temperature/K                      | 150.0                                                         |
| Crystal system                     | monoclinic                                                    |
| Space group                        | P2 <sub>1</sub> /c(no. 14)                                    |
| a/Å                                | 16.843(11)                                                    |
| b/Å                                | 5.480(2)                                                      |
| c/Å                                | 15.129(6)                                                     |
| β/°                                | 111.15(2)                                                     |
| Volume/Å <sup>3</sup>              | 1302.2(11)                                                    |
| Z                                  | 4                                                             |
| ρ <sub>calc</sub> /cm <sup>3</sup> | 1.358                                                         |
| μ/mm <sup>-1</sup>                 | 0.093                                                         |
| 2θ range for data collection/°     | 4.524 to 50.052                                               |
| Independent reflections            | 6128 [R <sub>int</sub> = 0.0666, R <sub>sigma</sub> = 0.0836] |
| Final R indexes [I >= 2σ (I)]      | R <sub>1</sub> = 0.0997                                       |
| Final R indexes [all data]         | wR <sub>2</sub> = 0.2709                                      |

**Table 3. Fractional Atomic Coordinates (×10<sup>4</sup>) and Equivalent Isotropic Displacement Parameters (Å<sup>2</sup>×10<sup>3</sup>). U<sub>eq</sub> is defined as 1/3 of of the trace of the**

| orthogonalised $U_{ij}$ tensor |         |           |            |          |
|--------------------------------|---------|-----------|------------|----------|
| Atom                           | x       | y         | z          | U(eq)    |
| O2                             | 2273(3) | 1985(8)   | 5478(3)    | 30.3(10) |
| O1                             | 3599(3) | -2165(7)  | 5572(3)    | 32.8(11) |
| O3                             | 1491(3) | 4615(9)   | 5964(3)    | 40.7(12) |
| C2                             | 1514(3) | 4779(11)  | 4358(4)    | 25.0(13) |
| C8                             | 1958(3) | 3394(10)  | 6841(4)    | 24.1(13) |
| C17                            | 5263(4) | -1528(10) | 3610.6(10) | 24.5(13) |
| C9                             | 2482(4) | 1539(11)  | 4634(4)    | 25.8(13) |
| C1                             | 1728(4) | 3902(11)  | 5335(4)    | 27.1(13) |
| C11                            | 3930(4) | -194(10)  | 5552(4)    | 21.0(12) |
| C12                            | 4846(3) | 226(10)   | 6159(4)    | 20.7(12) |
| C16                            | 6107(4) | -1165(11) | 7434(4)    | 28.7(14) |
| C3                             | 984(4)  | 6715(11)  | 3906(4)    | 27.1(13) |
| C7                             | 1898(4) | 3819(12)  | 3015(4)    | 30.2(14) |
| C6                             | 1387(4) | 5756(12)  | 2538(4)    | 32.8(15) |
| C14                            | 6136(4) | 2647(11)  | 6654(4)    | 30.7(14) |
| C13                            | 5289(3) | 2324(11)  | 6074(4)    | 24.0(13) |
| C4                             | 502(4)  | 8227(13)  | 4353(5)    | 39.5(17) |
| C5                             | 944(4)  | 7194(12)  | 2974(4)    | 35.1(16) |
| C10                            | 3441(4) | 1862(10)  | 4920(4)    | 23.5(13) |
| C15                            | 6536(4) | 912(11)   | 7339(4)    | 29.3(14) |

| Table 4. Anisotropic Displacement Parameters ( $\text{\AA}^2 \times 10^3$ ). The Anisotropic displacement factor exponent takes the form: $2\pi^2[h^2a^*2U_{11}+2hka^*b^*U_{12}+\dots]$ . |          |          |          |          |          |          |
|-------------------------------------------------------------------------------------------------------------------------------------------------------------------------------------------|----------|----------|----------|----------|----------|----------|
| Atom                                                                                                                                                                                      | $U_{11}$ | $U_{22}$ | $U_{33}$ | $U_{23}$ | $U_{13}$ | $U_{12}$ |
| O2                                                                                                                                                                                        | 30(2)    | 35(2)    | 26(2)    | 6.7(19)  | 10.8(18) | -0.1(19) |
| O1                                                                                                                                                                                        | 34(2)    | 22(2)    | 37(2)    | 5.0(19)  | 6.2(19)  | -2.8(19) |
| O3                                                                                                                                                                                        | 34(3)    | 62(3)    | 27(2)    | -2(2)    | 12(2)    | 0(2)     |
| C2                                                                                                                                                                                        | 13(3)    | 33(3)    | 27(3)    | -3(3)    | 6(2)     | -8(2)    |
| C8                                                                                                                                                                                        | 17(3)    | 25(3)    | 27(3)    | -7(3)    | 4(2)     | -4(2)    |
| C17                                                                                                                                                                                       | 31(3)    | 19(3)    | 22(3)    | -1(2)    | 6(2)     | 0(2)     |
| C9                                                                                                                                                                                        | 26(3)    | 25(3)    | 24(3)    | -1(2)    | 7(2)     | -2(2)    |
| C1                                                                                                                                                                                        | 20(3)    | 32(3)    | 29(3)    | -1(3)    | 7(2)     | -4(3)    |
| C11                                                                                                                                                                                       | 28(3)    | 16(3)    | 20(3)    | -4(2)    | 11(2)    | 1(2)     |
| C12                                                                                                                                                                                       | 25(3)    | 18(3)    | 20(3)    | 1(2)     | 9(2)     | 1(2)     |
| C16                                                                                                                                                                                       | 32(3)    | 30(3)    | 24(3)    | 1(3)     | 9(3)     | 10(3)    |
| C3                                                                                                                                                                                        | 19(3)    | 27(3)    | 33(3)    | -4(3)    | 5(2)     | -2(2)    |
| C7                                                                                                                                                                                        | 25(3)    | 36(4)    | 27(3)    | -6(3)    | 6(3)     | -5(3)    |
| C6                                                                                                                                                                                        | 28(3)    | 43(4)    | 19(3)    | 6(3)     | 0(2)     | -5(3)    |
| C14                                                                                                                                                                                       | 27(3)    | 25(3)    | 39(4)    | -4(3)    | 11(3)    | -3(3)    |

|     |       |       |       |        |       |       |
|-----|-------|-------|-------|--------|-------|-------|
| C13 | 24(3) | 25(3) | 23(3) | 0(2)   | 9(2)  | 3(2)  |
| C4  | 28(3) | 39(4) | 47(4) | -11(3) | 8(3)  | 3(3)  |
| C5  | 23(3) | 35(4) | 34(3) | 5(3)   | -6(3) | 1(3)  |
| C10 | 29(3) | 18(3) | 23(3) | -2(2)  | 10(2) | -3(2) |
| C15 | 25(3) | 34(3) | 28(3) | -4(3)  | 9(3)  | 3(3)  |

| <b>Table 5. Bond Lengths</b> |             |                 |  |             |             |                 |
|------------------------------|-------------|-----------------|--|-------------|-------------|-----------------|
| <b>Atom</b>                  | <b>Atom</b> | <b>Length/Å</b> |  | <b>Atom</b> | <b>Atom</b> | <b>Length/Å</b> |
| O2                           | C9          | 1.464(7)        |  | C9          | C10         | 1.524(8)        |
| O2                           | C1          | 1.360(7)        |  | C11         | C12         | 1.501(8)        |
| O1                           | C11         | 1.221(7)        |  | C11         | C10         | 1.514(8)        |
| O3                           | C1          | 1.220(7)        |  | C12         | C13         | 1.401(8)        |
| C2                           | C8          | 1.373(8)        |  | C16         | C15         | 1.384(9)        |
| C2                           | C1          | 1.471(8)        |  | C3          | C4          | 1.483(9)        |
| C2                           | C3          | 1.396(8)        |  | C3          | C5          | 1.412(9)        |
| C8                           | C9          | 1.500(8)        |  | C7          | C6          | 1.392(9)        |
| C8                           | C7          | 1.383(8)        |  | C6          | C5          | 1.403(9)        |
| C17                          | C12         | 1.399(8)        |  | C14         | C13         | 1.390(8)        |
| C17                          | C16         | 1.395(8)        |  | C14         | C15         | 1.388(9)        |
| O2                           | C9          | 1.464(7)        |  | C9          | C10         | 1.524(8)        |
| O2                           | C1          | 1.360(7)        |  | C11         | C12         | 1.501(8)        |

| <b>Table 6. Bond Angles</b> |             |             |                |  |             |             |             |                |
|-----------------------------|-------------|-------------|----------------|--|-------------|-------------|-------------|----------------|
| <b>Atom</b>                 | <b>Atom</b> | <b>Atom</b> | <b>Angle/°</b> |  | <b>Atom</b> | <b>Atom</b> | <b>Atom</b> | <b>Angle/°</b> |
| C1                          | O2          | C9          | 110.64         |  | C12         | C11         | C10         | 118.5(5)       |
| C8                          | C2          | C1          | 107.9(5)       |  | C17         | C12         | C11         | 118.5(5)       |
| C8                          | C2          | C3          | 123.6(5)       |  | C17         | C12         | C13         | 119.3(5)       |
| C3                          | C2          | C1          | 128.5(6)       |  | C13         | C12         | C11         | 122.2(5)       |
| C2                          | C8          | C9          | 109.3(5)       |  | C15         | C16         | C17         | 120.0(6)       |
| C2                          | C8          | C7          | 121.4(5)       |  | C2          | C3          | C4          | 124.0(6)       |
| C7                          | C8          | C9          | 129.3(5)       |  | C2          | C3          | C5          | 114.9(5)       |
| C16                         | C17         | C12         | 120.0(5)       |  | C5          | C3          | C4          | 121.0(6)       |
| O2                          | C9          | C8          | 103.5(5)       |  | C8          | C7          | C6          | 117.3(6)       |
| O2                          | C9          | C10         | 107.3(4)       |  | C7          | C6          | C5          | 121.2(6)       |
| C8                          | C9          | C10         | 114.5(5)       |  | C15         | C14         | C13         | 119.6(6)       |
| O2                          | C1          | C2          | 108.6(5)       |  | C14         | C13         | C12         | 120.4(5)       |
| O3                          | C1          | O2          | 121.0(5)       |  | C6          | C5          | C3          | 121.6(6)       |
| O3                          | C1          | C2          | 130.4(6)       |  | C11         | C10         | C9          | 111.9(5)       |
| O1                          | C11         | C12         | 119.9(5)       |  | C16         | C15         | C14         | 120.7(6)       |
| O1                          | C11         | C10         | 121.6(5)       |  |             |             |             |                |

| <b>Table 7. Hydrogen Atom Coordinates (<math>\text{\AA}\times 10^4</math>) and Isotropic Displacement Parameters (<math>\text{\AA}^2\times 10^3</math>)</b> |          |          |          |              |
|-------------------------------------------------------------------------------------------------------------------------------------------------------------|----------|----------|----------|--------------|
| <b>Atom</b>                                                                                                                                                 | <b>x</b> | <b>y</b> | <b>z</b> | <b>U(eq)</b> |
| H17                                                                                                                                                         | 4970.47  | -2965.82 | 6899.27  | 29           |
| H9                                                                                                                                                          | 2310     | -150.01  | 4388.8   | 31           |
| H16                                                                                                                                                         | 6387.02  | -2344.38 | 7903.29  | 34           |
| H7                                                                                                                                                          | 2192.07  | 2829.58  | 2717.86  | 36           |
| H6                                                                                                                                                          | 1338.04  | 6110.01  | 1905.59  | 39           |
| H14                                                                                                                                                         | 6439.77  | 4046.62  | 6581.09  | 37           |
| H13                                                                                                                                                         | 5008.72  | 3532.95  | 5618.56  | 29           |
| H4A                                                                                                                                                         | -4.98    | 7334.97  | 4344.93  | 59           |
| H4B                                                                                                                                                         | 329.05   | 9756.45  | 4000.15  | 59           |
| H4C                                                                                                                                                         | 863.52   | 8588.07  | 5009.81  | 59           |
| H5                                                                                                                                                          | 609.69   | 8522.21  | 2633.69  | 42           |
| H10A                                                                                                                                                        | 3588.04  | 1922.62  | 4343.11  | 28           |
| H10B                                                                                                                                                        | 3612.63  | 3432.82  | 5258.59  | 28           |
| H15                                                                                                                                                         | 7110.22  | 1154.63  | 7746.59  | 35           |

## Mechanistic Studies

### Independent KIE study

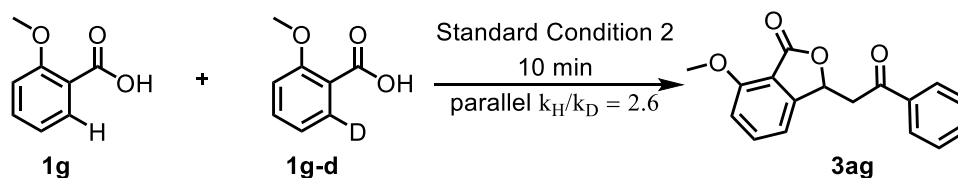

A teflon-capped vial was charged with the 2-methoxy benzoic acid (**1g**) or mono-deuterated 2-methoxy benzoic acid (**1g-d**) (0.1 mmol, 1.0 equiv.), **2a** (0.25 mmol, 2.5 equiv.),  $\text{K}_3\text{PO}_4$  (0.1 mmol, 1equiv.),  $[\text{Cp}^*\text{RhCl}_2]_2$  (4 mol%),  $\text{AgOAc}$  (2 mol, 2 equiv.) and 4Å Ms (10 mg) in MeCN (1 mL) under an air atmosphere. The reaction mixture was allowed to stir at 80 °C for 10 min. After that, the mixture was cooled down and was extracted with EtOAc. The organic layers were combined, filtered through a pad of Celite and concentrated *in vacuo*. The crude reaction mixture was diluted with  $\text{CDCl}_3$ ,  $\text{CH}_2\text{Br}_2$  as internal standard was added and the mixture was analyzed via  $^1\text{H}$  NMR spectroscopy. The yields of **3ag** were obtained in 13.6 % and 5.2 % respectively

(determined as an average of 2 runs), resulting in an  $k_H/k_D$  of 2.6.

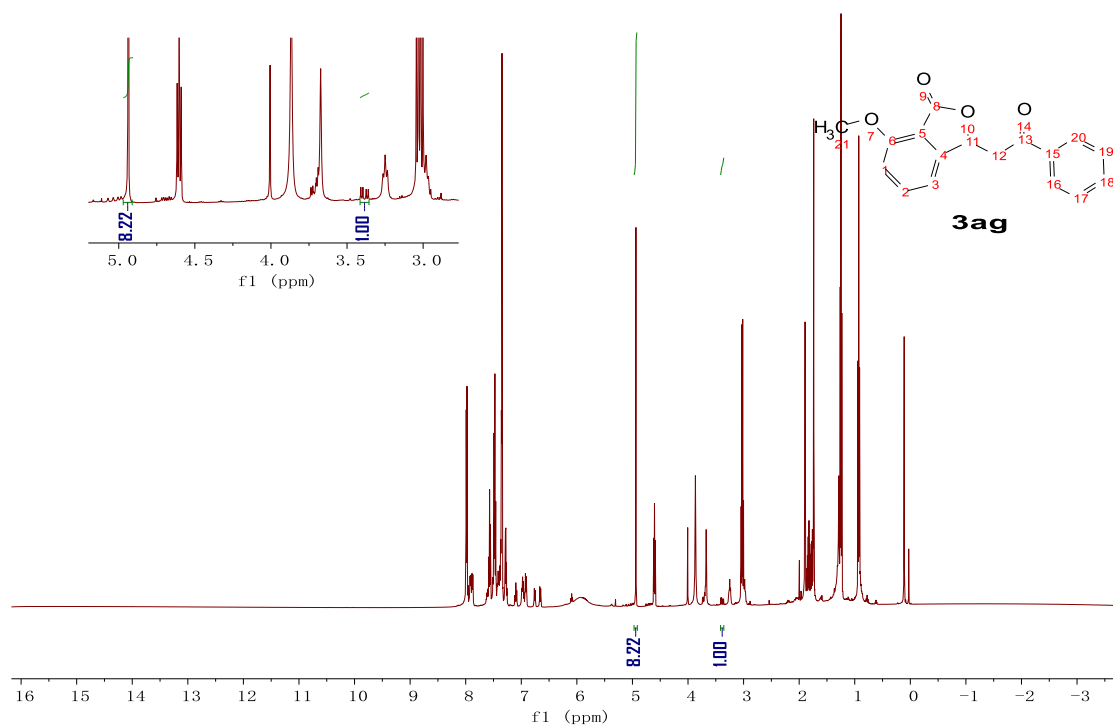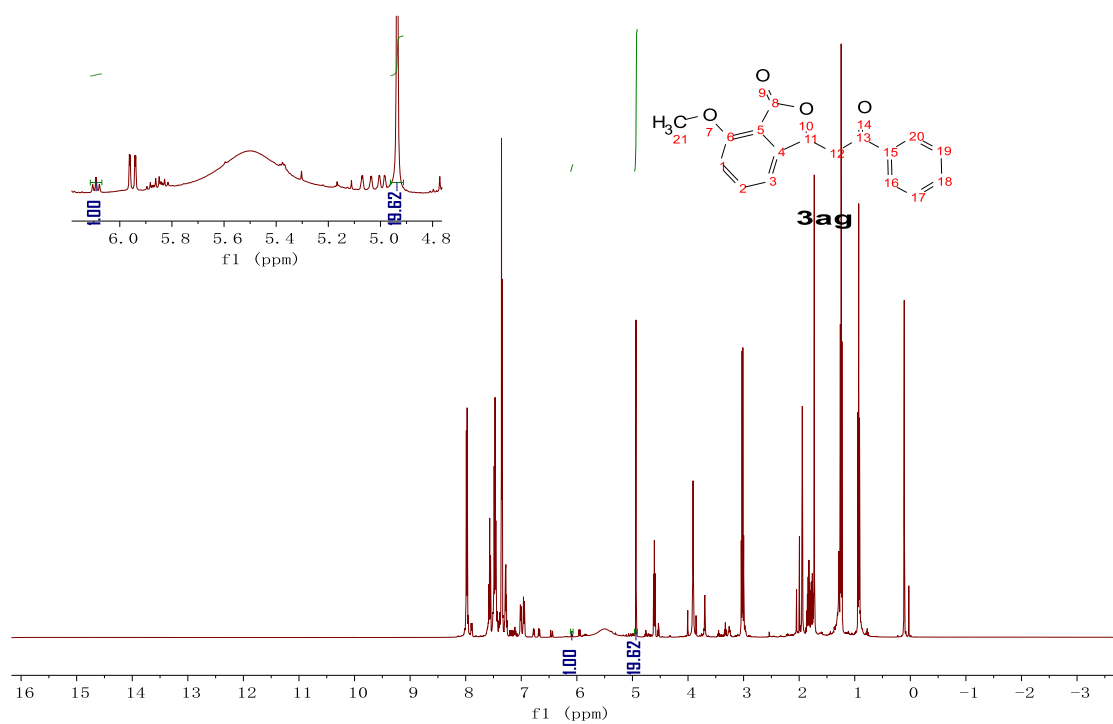

## H/D exchange

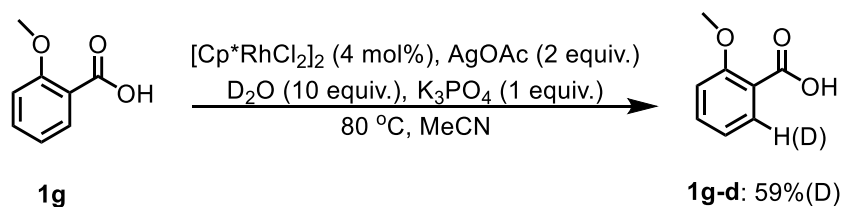

A teflon-capped vial was charged with 2-methoxy benzoic acid (**1g**) (0.1 mmol, 1 equiv.), D<sub>2</sub>O (1.0 mmol, 10 equiv.), K<sub>3</sub>PO<sub>4</sub> (0.1 mmol, 1 equiv.), [Cp\*RhCl<sub>2</sub>]<sub>2</sub> (4 mol%), AgOAc (0.2 mmol) at 1 mL of MeCN under an air atmosphere. The reaction mixture was allowed to stir at 80 °C for 2 h. The reaction mixture was cooled down to room temperature and acidified with 1M HCl to pH = 1. Then poured into water, the mixture was extracted by EtOAc, followed by dried with anhydrous Na<sub>2</sub>SO<sub>4</sub>. Then the solvent was removed under reduced pressure and the residue was purified by silica gel chromatography using EA/PE to afford compounds. The ratio was identified by <sup>1</sup>HNMR (59% D).



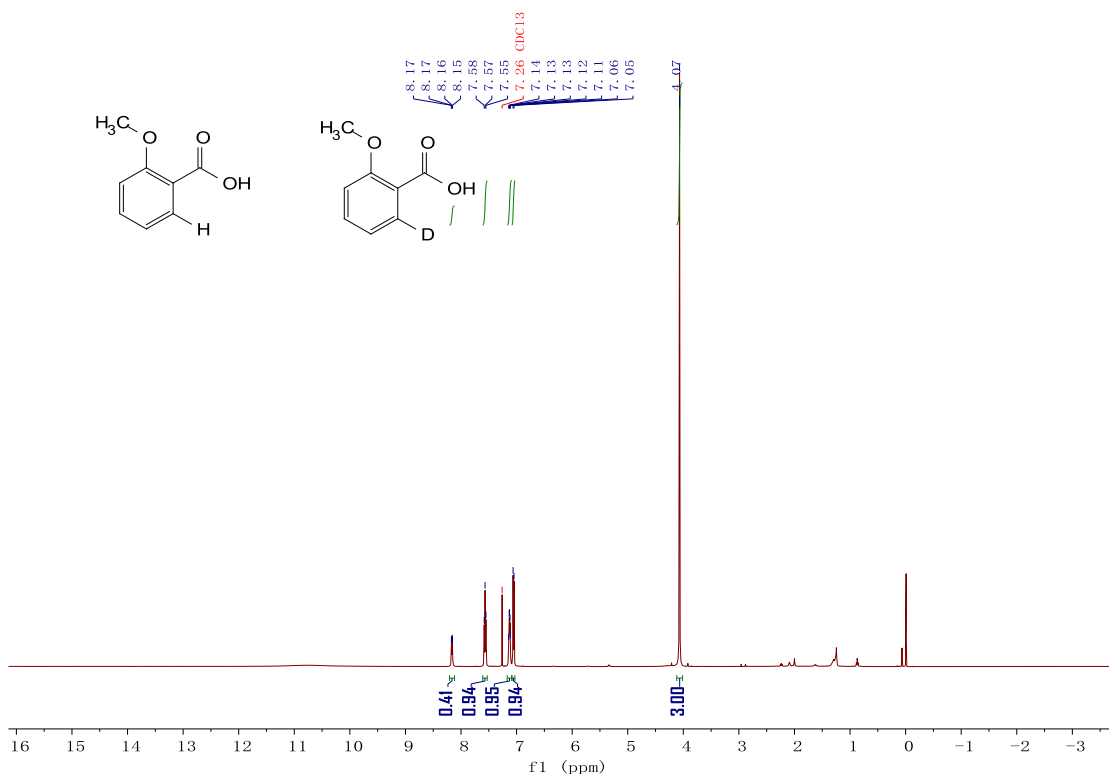

### Control experiment

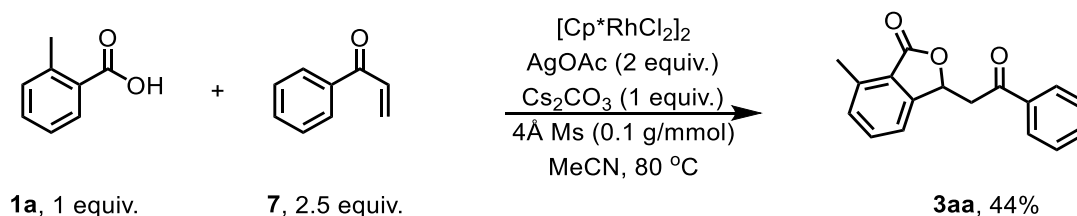

A teflon-capped vial was charged with the benzoic acids (0.1 mmol, 1.0 equiv.), 1-phenylprop-2-enone **7** (0.25 mmol, 2.5 equiv.),  $\text{Cs}_2\text{CO}_3$  (0.1 mmol, 1 equiv.),  $[\text{Cp}^*\text{RhCl}_2]_2$  (5 mol%), AgOAc (2 equiv.), 4Å Ms (10 mg) under an air atmosphere. The reaction mixture was stirred at 80 °C for 24 h. After that, the mixture was cooled down and the mixture was extracted with EtOAc. The organic layers were combined, filtered through a pad of Celite and concentrated *in vacuo*. The residue was purified by silica gel chromatography using EA/PE to afford pure compound **3aa** in 44% isolated yield.

## Characterization data of compounds

### 1- phenylcyclopropan-1-ol (2a)

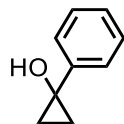

$^1\text{H NMR}$  (600 MHz,  $\text{CDCl}_3$ ):  $\delta$  7.37 - 7.17 (m, 5H), 1.30 - 1.23 (m, 2H), 1.07 - 1.03 (m, 2H).

### 1-(2-methylphenyl)cyclopropan-1-ol (2b)

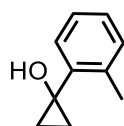

$^1\text{H NMR}$  (600 MHz,  $\text{CDCl}_3$ ):  $\delta$  7.33 (d,  $J = 7.1\text{Hz}$  1H), 7.24 - 7.10 (m, 3H), 2.33 (s, 3H), 1.18 - 1.11 (m, 2H), 0.94 - 0.88 (m, 2H).

### 1-(2-fluorophenyl)cyclopropan-1-ol (2c)

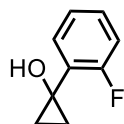

$^1\text{H NMR}$  (500 MHz,  $\text{CDCl}_3$ ):  $\delta$  7.38 (td,  $J = 7.6, 1.8\text{ Hz}$ , 1H), 7.29 - 7.25(m, 1H), 7.10 (td,  $J = 7.6, 1.8\text{ Hz}$ , 1H), 7.05 (ddd,  $J = 11.0, 7.6, 1.8\text{Hz}$ , 1H), 1.43 - 1.37 (m, 2H), 1.18-1.11(m, 2H).

### 1-(3-chlorophenyl)cyclopropan-1-ol (2d)

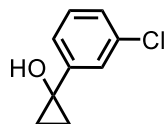

$^1\text{H NMR}$  (600 MHz,  $\text{CDCl}_3$ ):  $\delta$  7.29 (t,  $J = 2\text{Hz}$ , 1H), 7.26 - 7.21 (m, 1H), 7.18 (t,  $J = 7.8\text{ Hz}$ , 1H), 7.12 (dt,  $J = 7.8, 2\text{ Hz}$ , 1H), 1.30 - 1.25 (m, 2H), 1.06 - 1.00 (m, 2H).

### 1-(4-methoxyphenyl)cyclopropan-1-ol (2e)

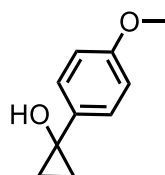

<sup>1</sup>H NMR (600 MHz, CDCl<sub>3</sub>): δ 7.36 - 7.16 (m, 2H), 6.96 - 6.81 (m, 2H), 3.8 (s, 3H), 1.23 - 1.14 (m, 2H), 1.01 - 0.92 (m, 2H).

**1-(2-furanyl)cyclopropan-1-ol (2f)**

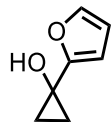

<sup>1</sup>H NMR (600 MHz, CDCl<sub>3</sub>): δ 7.32 - 7.29 (m, 1H), 6.32 (dd, *J* = 3.2, 1.8, 1H), 6.21 (d, *J* = 3.2, 1H), 1.18 - 1.13 (m, 2H), 1.09 - 1.05 (m, 2H).

**1-benzylcyclopropan-1-ol (2g)**

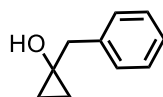

<sup>1</sup>H NMR (500MHz, CDCl<sub>3</sub>): δ 7.36 - 7.29 (m, 4H), 7.26 (tt, *J* = 7, 1.5 Hz, 1H), 2.88 (s, 2H), 0.85 - 0.78 (m, 2H), 0.67-0.61 (m, 2H).

**1-(2-methoxybenzyl)cyclopropan-1-ol (2h)**

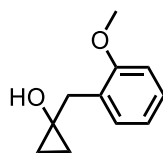

<sup>1</sup>H NMR (500MHz, CDCl<sub>3</sub>): δ 7.28 - 7.21 (m, 2H), 6.94 (td, *J* = 7.5, 1 Hz, 1H), 6.91 (d, *J* = 7.5 Hz, 1H), 3.85 (s, 3H), 2.96 (s, 2H), 0.79 - 0.74 (m, 2H), 0.64 - 0.59 (m, 2H).

**1-(naphthalenylmethyl)cyclopropan-1-ol (2i)**

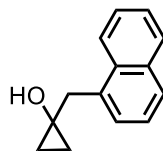

<sup>1</sup>H NMR (500 MHz, CDCl<sub>3</sub>): δ 8.17 (d, *J* = 8.5 1H), 7.90 (dd, *J* = 8.0, 1 Hz, 1H), 7.81 (dt, *J* = 8.0, 1 Hz, 1H), 7.59 - 7.43 (m, 4H), 3.47 (s, 2H), 0.91 - 0.84 (m, 2H), 0.75 - 0.67 (m, 2H).

**1-(phenoxyethyl)cyclopropan-1-ol (2j)**

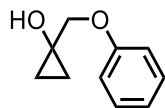

**<sup>1</sup>H NMR** (500MHz, CDCl<sub>3</sub>): δ 7.33 - 7.27 (m, 2H), 6.98 (tt, *J* = 7.3, 1 Hz, 1H), 6.96 - 6.91 (m, 2H), 4.01 (s, 2H), 1.12 - 0.84 (m, 2H), 0.86 - 0.56 (m, 2H).

**[1,1'-bi(cyclopropan)]-1-ol (2k)**

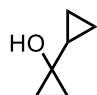

**<sup>1</sup>H NMR** (500 MHz, CDCl<sub>3</sub>): δ 1.37 (tt, *J* = 8, 5 Hz, 1H), 0.74 - 0.67 (m, 2H), 0.54 - 0.48 (m, 2H), 0.45 - 0.41 (m, 2H), 0.23 - 0.18 (m, 2H).

**1-cyclobutylcyclopropan-1-ol (2l)**

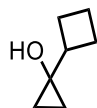

**<sup>1</sup>H NMR** (600 MHz, CDCl<sub>3</sub>): δ 2.5 (q, *J* = 8.4 Hz, 1H), 2.00 - 1.93 (m, 2H), 1.85 - 1.69 (m, 4H), 0.72 - 0.67 (m, 2H), 0.52 - 0.47 (m, 2H).

**1-cyclopentylcyclopropan-1-ol (2m)**

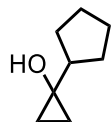

**<sup>1</sup>H NMR** (600 MHz, CDCl<sub>3</sub>): δ 1.92 - 1.82 (m, 1H), 1.77 - 1.69 (m, 2H), 1.68 - 1.60 (m, 2H), 1.58 - 1.50 (m, 2H), 1.41 - 1.30 (m, 2H), 0.72 - 0.66 (m, 2H), 0.49 - 0.45 (m, 2H).

**1-(tetrahydropyran-4-yl)cyclopropan-1-ol (2n)**

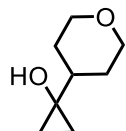

**<sup>1</sup>H NMR** (600 MHz, CDCl<sub>3</sub>): δ 4.03 (dt, *J* = 10.8, 3 Hz, 2H), 3.46 - 3.29 (m, 2H), 1.68 - 1.52 (m, 4H), 1.36 - 1.17 (m, 1H), 0.76 - 0.61 (m, 2H), 0.58 - 0.37 (m, 2H).

**1-undecylcyclopropan-1-ol (2o)**

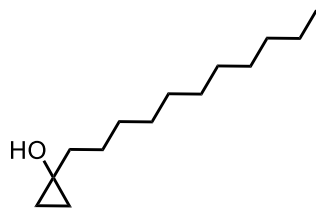

$^1\text{H NMR}$  (600 MHz,  $\text{CDCl}_3$ ):  $\delta$  1.59-1.54 (m, 2H), 1.54 - 1.49 (m, 2H), 1.38 - 1.22 (m, 16H), 0.9 (t,  $J = 6.9$  Hz, 3H), 0.77 - 0.71 (m, 2H), 0.48 - 0.42 (m, 2H).

**(4R)-4-((3R,5R,6S,8S,10R,13R,14S)-3,6-bis((tert-butyl dimethylsilyl)oxy)-5,10,13-trimethylhexadecahydro-1H-cyclopenta[a]phenanthren-17-yl)pentanoate (II)**

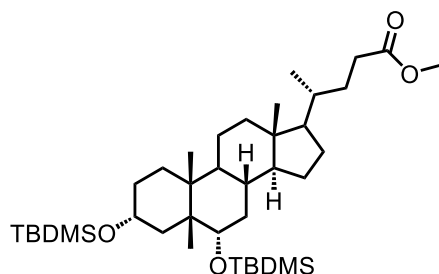

$^1\text{H NMR}$  (500 MHz,  $\text{CDCl}_3$ ):  $\delta$  4.00 (dt,  $J = 11.7, 4.3$  Hz, 1H), 3.69 (s, 3H), 3.59 - 3.51 (m, 1H), 2.38 (ddd,  $J = 15.5, 10.0, 5.0$  Hz, 1H), 2.24 (ddd,  $J = 15.5, 9.5, 6.0$  Hz, 1H), 2.00 - 1.72 (m, 5H), 1.65 - 1.54 (m, 2H), 1.52 - 1.26 (m, 11H), 1.25 - 0.97 (m, 8H), 0.95 - 0.85 (m, 24H), 0.66 (s, 3H), 0.09 - 0.04 (m, 12H).

**1-((3R)-3-((3R,5R,6S,8S,10R,13R,14S)-3,6-bis((tert-butyl dimethylsilyl)oxy)-5,10,13-trimethylhexadecahydro-1H-cyclopenta[a]phenanthren-17-yl)butyl)cyclopropan-1-ol (2p)**

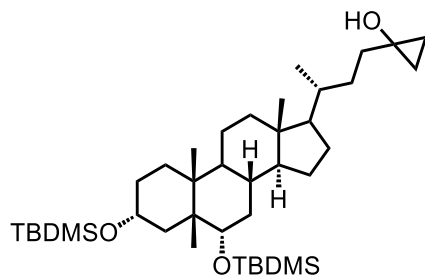

$^1\text{H NMR}$  (500 MHz,  $\text{CDCl}_3$ ):  $\delta$  4.20 - 3.86 (m, 1H), 3.57 - 3.49 (m, 1H), 1.97 - 1.91 (m, 1H), 1.91 - 1.79 (m, 2H), 1.78 - 1.69 (m, 1H), 1.67 - 1.62 (m, 2H), 1.60 - 1.52 (m, 3H), 1.49 - 1.35 (m, 9H), 1.27 - 1.22 (m, 2H), 1.16 - 1.05 (m, 4H), 1.02 - 0.94 (m, 2H), 0.93 - 0.82 (m, 24H), 0.78 - 0.67 (m, 2H), 0.63 (s, 3H), 0.48 - 0.37 (m, 2H), 0.08 - 0.01 (m, 12H).

**methyl (S)-2-(4-isobutylphenyl)propanoate (IV)**

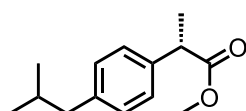

$^1\text{H NMR}$  (500 MHz,  $\text{CDCl}_3$ ):  $\delta$  7.23 - 7.17 (m, 2H), 7.13 - 7.08 (m, 2H), 3.70 (d,  $J = 7.5$  Hz, 1H), 3.66 (s, 3H), 2.45 (d,  $J = 7.0$  Hz, 2H), 1.90 - 1.80 (m, 1H), 1.49 (d,  $J = 7.5$  Hz, 3H), 0.90 (d,  $J = 7.0$  Hz, 6H).

**(S)-1-(1-(4-isobutylphenyl)ethyl)cyclopropan-1-ol (2q)**

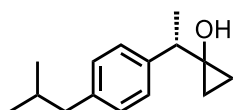

$^1\text{H NMR}$  (500 MHz,  $\text{CDCl}_3$ )  $\delta$  7.25 - 7.21 (m, 2H), 7.13 - 7.10 (m, 2H), 2.54 (q,  $J = 7.2$  Hz, 1H), 2.46 (d,  $J = 7.5$  Hz, 2H), 1.91 - 1.81 (m, 1H), 1.68 (s, 1H), 1.39 (d,  $J = 7.2$  Hz, 3H), 0.92 (d,  $J = 6.5$  Hz, 6H), 0.86 - 0.80 (m, 1H), 0.75 - 0.65 (m, 2H), 0.64 - 0.58 (m, 1H).

**methyl 2-((2,3-dimethylphenyl)(methyl)amino)benzoate (VI)**

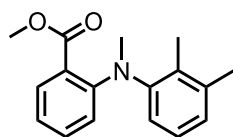

$^1\text{H NMR}$  (600 MHz,  $\text{CDCl}_3$ ):  $\delta$  7.43 (dd,  $J = 7.8, 1.8$  Hz, 1H), 7.37 - 7.33 (m, 1H), 7.03 (t,  $J = 7.5$  Hz, 1H), 6.97 (d,  $J = 7.2$  Hz, 1H), 6.95 (d,  $J = 8.4$  Hz, 1H), 6.87 (t,  $J = 7.5$  Hz, 1H), 6.81 (d,  $J = 7.8$  Hz, 1H), 3.41 (s, 3H), 3.16 (s, 3H), 2.29 (s, 3H), 2.18 (s, 3H).

**2-((2,3-dimethylphenyl)(methyl)amino)benzoic acid (1s)**

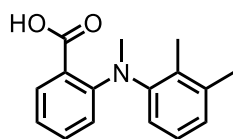

$^1\text{H NMR}$  (500 MHz,  $\text{CDCl}_3$ ):  $\delta$  8.29 (dd,  $J = 8.0, 1.5$  Hz, 1H), 7.48 - 7.40 (m, 2H), 7.31 (dd,  $J = 7.5, 1.0$  Hz, 1H), 7.22 - 7.17 (m, 2H), 7.09 - 7.05 (m, 1H), 6.90 (dd,  $J = 8.0, 1.0$  Hz, 1H), 3.18 (s, 3H), 2.24 (s, 3H), 1.89 (s, 3H).

**7-methyl-3-(2-oxo-2-phenylethyl)isobenzofuran-1(3H)-one (3aa)**

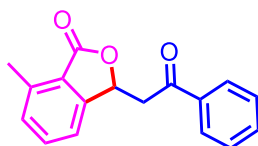

The product was synthesized by standard condition 1 in 75% yield.

**<sup>1</sup>H NMR** (500 MHz, CDCl<sub>3</sub>): δ 7.98 - 7.93 (m, 2H), 7.62 - 7.56 (m, 1H), 7.53 - 7.44 (m, 3H), 7.34 (d, *J* = 8.0 Hz, 1H), 7.28 (d, *J* = 7.5 Hz, 1H), 6.11 (t, *J* = 6.5 Hz, 1H), 3.71 (dd, *J* = 17.5, 6.5 Hz, 1H), 3.38 (dd, *J* = 17.5, 6.5 Hz, 1H), 2.70 (s, 3H).

**<sup>13</sup>C NMR** (151 MHz, CDCl<sub>3</sub>): δ 196.26, 170.47, 150.38, 139.98, 136.39, 134.12, 133.96, 131.17, 128.96, 128.32, 123.48, 120.06, 76.30, 44.01, 17.53.

**ESI-MS** calcd. for C<sub>17</sub>H<sub>14</sub>O<sub>3</sub>Na [M+Na<sup>+</sup>]: 289.0840, found: 289.0837.

### 7-methyl-3-(2-oxo-2-(o-tolyl)ethyl)isobenzofuran-1(3H)-one (3ba)

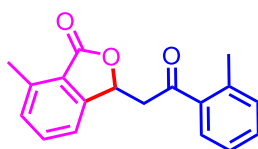

The product was synthesized by standard condition 1 in 75% yield.

**<sup>1</sup>H NMR** (500 MHz, CDCl<sub>3</sub>): δ 7.65 (dd, *J* = 7.5, 1 Hz, 1H), 7.55 (t, *J* = 7.6 Hz, 1H), 7.43 (td, *J* = 7.5, 1 Hz, 1H), 7.36 (d, *J* = 7.5, 1H), 7.33 - 7.30 (m, 2H), 7.28 (dd, *J* = 7.5, 1 Hz, 1H), 6.11 (t, *J* = 6.5 Hz, 1H), 3.66 (dd, *J* = 17, 6.5 Hz, 1H), 3.37 (dd, *J* = 17, 6.5 Hz, 1H), 2.72 (s, 3H), 2.61 (s, 3H).

**<sup>13</sup>C NMR** (126 MHz, CDCl<sub>3</sub>): δ 199.51, 170.43, 150.45, 140.01, 139.07, 136.72, 134.08, 132.42, 132.26, 131.13, 129.08, 126.01, 123.53, 119.83, 76.50, 46.50, 21.74, 17.50.

**ESI-MS** calcd. for C<sub>18</sub>H<sub>16</sub>O<sub>3</sub>Na [M+Na<sup>+</sup>]: 303.0996, found: 303.0998.

### 3-(2-(2-fluorophenyl)-2-oxoethyl)-7-methylisobenzofuran-1(3H)-one (3ca)

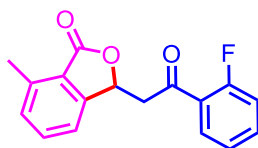

The product was synthesized by standard condition 1 in 61% yield.

**<sup>1</sup>H NMR** (500 MHz, CDCl<sub>3</sub>): δ 7.96 (dt, *J* = 7.5, 2 Hz, 1H), 7.56 (dddd, *J* = 8, 7.5, 5.5, 2 Hz, 1H), 7.52 (t, *J* = 7.5, 1H), 7.33 (d, *J* = 7.5, 1H), 7.30 - 7.23 (m, 2H), 7.14 (ddd, *J* = 8, 6, 1 Hz, 1H), 6.09 (t, *J* = 6.5, 1H), 3.64 (ddd, *J* = 18, 6.5, 3 Hz, 1H), 3.45 (ddd, *J* = 18, 6.5, 3 Hz, 1H), 2.69 (s, 3H).

**<sup>13</sup>C NMR** (126 MHz, CDCl<sub>3</sub>): δ 194.16, 170.45, 163.31, 161.28, 150.25, 139.99, 135.57 (d, *J* = 9.3 Hz), 134.08, 131.13, 130.84 (d, *J* = 1.5 Hz), 124.88, 123.54, 119.85, 116.93 (d, *J* = 23.8 Hz), 75.92, 48.78 (d, *J* = 8.2 Hz), 17.50.

**ESI-MS** calcd. for C<sub>17</sub>H<sub>13</sub>FO<sub>3</sub>Na [M+Na<sup>+</sup>]: 307.0746, found: 307.0750.

**<sup>19</sup>F NMR** (500 MHz, CDCl<sub>3</sub>): δ -108.87.

### 3-(2-(3-chlorophenyl)-2-oxoethyl)-7-methylisobenzofuran-1(3H)-one (3da)

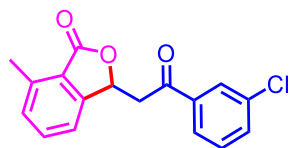

The product was synthesized by standard condition 1 in 63% yield.

**<sup>1</sup>H NMR** (600 MHz, CDCl<sub>3</sub>): δ 7.94 (t, *J* = 1.8 Hz, 1H), 7.83 (d, *J* = 7.8 Hz, 1H), 7.58 (ddd, *J* = 7.8, 1.8, 1.2 Hz, 1H), 7.53 (t, *J* = 7.8, 1H), 7.44 (t, *J* = 7.8 Hz, 1H), 7.33 (d, *J* = 7.8 Hz, 1H), 7.30 (d, *J* = 7.8 Hz, 1H), 6.10 (t, *J* = 6.3 Hz, 1H), 3.68 (dd, *J* = 17.4, 6.3 Hz, 1H), 3.38 (dd, *J* = 17.4, 6.3 Hz, 1H), 2.71 (s, 3H).

**<sup>13</sup>C NMR** (151 MHz, CDCl<sub>3</sub>): δ 195.00, 170.31, 150.09, 140.08, 137.87, 135.36, 134.17, 133.86, 131.26, 130.30, 128.40, 126.42, 123.46, 119.91, 75.99, 44.10, 17.50.

**ESI-MS** calcd. for C<sub>17</sub>H<sub>13</sub>ClO<sub>3</sub>Na [M+Na<sup>+</sup>]: 323.0450, found: 323.0447.

### 3-(2-(4-methoxyphenyl)-2-oxoethyl)-7-methylisobenzofuran-1(3H)-one (3ea)

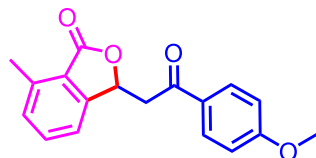

The product was synthesized by standard condition 1 in 44% yield.

**<sup>1</sup>H NMR** (500 MHz, CDCl<sub>3</sub>): δ 7.96 - 7.89 (m, 2H), 7.50 (t, *J* = 7.6 Hz, 1H), 7.35 - 7.30 (m, 1H), 7.30 - 7.24 (m, 1H), 6.97-6.91 (m, 2H), 6.09 (t, *J* = 6.5 Hz, 1H), 3.87 (s, 3H), 3.66 (dd, *J* = 17.5, 6.5 Hz, 1H), 3.31 (dd, *J* = 17.5, 6.5 Hz, 1H), 2.69 (s, 3H).

**<sup>13</sup>C NMR** (126 MHz, CDCl<sub>3</sub>): δ 194.68, 170.51, 164.18, 150.55, 139.91, 134.07, 131.09, 130.68, 129.59, 123.50, 120.13, 114.11, 76.56, 55.68, 43.65, 17.50.

**ESI-MS** calcd. for C<sub>18</sub>H<sub>16</sub>O<sub>4</sub>Na [M+Na<sup>+</sup>]: 319.0946, found: 319.0950.

### 3-(2-(furan-2-yl)-2-oxoethyl)-7-methylisobenzofuran-1(3H)-one (3fa)

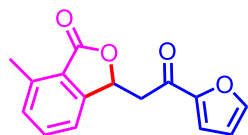

The product was synthesized by standard condition 1 in 51% yield.

**<sup>1</sup>H NMR** (600 MHz, CDCl<sub>3</sub>): δ 7.61 - 7.59 (m, 1H), 7.51 (t, *J* = 7.5 Hz, 1H), 7.31 (d, *J* = 7.5 Hz, 1H), 7.28 (d, *J* = 7.5 Hz, 1H), 7.25 (d, *J* = 3.6 Hz, 1H), 6.57 (dd, *J* = 3.6, 1.8 Hz, 1H), 6.04 (t, *J* = 6.6 Hz, 1H), 3.53 (dd, *J* = 17.5, 6.6 Hz, 1H), 3.24 (dd, *J* = 17.5, 6.6 Hz, 1H), 2.69 (s, 3H).

**<sup>13</sup>C NMR** (126 MHz, CDCl<sub>3</sub>): δ 184.91, 170.35, 152.40, 150.06, 147.22, 140.03, 134.12, 131.20,



123.46, 119.83, 118.34, 112.80, 75.93, 43.71, 17.50.

**ESI-MS** calcd. for C<sub>15</sub>H<sub>12</sub>O<sub>4</sub>H [M+H<sup>+</sup>]: 257.0814, found: 257.0819.

### 7-methyl-3-(2-oxo-3-phenylpropyl)isobenzofuran-1(3H)-one (3ga)

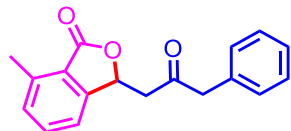

The product was synthesized by standard condition 2 in 40% yield.

**<sup>1</sup>H NMR** (500 MHz, CDCl<sub>3</sub>): δ 7.47 (t, *J* = 7.6 Hz, 1H), 7.36 - 7.31 (m, 2H), 7.30 - 7.27 (m, 1H), 7.26 - 7.24 (m, 1H), 7.22 - 7.19 (m, 2H), 7.20 - 7.15 (m, 1H), 5.84 (t, *J* = 6.5 Hz, 1H), 3.80 (d, *J* = 15.5 Hz, 1H), 3.76 (d, *J* = 15.5 Hz, 1H), 3.08 (dd, *J* = 17.5, 6.5 Hz, 1H), 2.86 (dd, *J* = 17.5, 6.5 Hz, 1H), 2.67 (s, 3H).

**<sup>13</sup>C NMR** (126 MHz, CDCl<sub>3</sub>): δ 204.54, 170.29, 149.95, 140.00, 134.07, 133.30, 131.13, 129.08, 129.61, 127.54, 123.37, 119.61, 75.92, 50.92, 46.78, 17.47.

**ESI-MS** calcd. for C<sub>18</sub>H<sub>16</sub>O<sub>3</sub>Na [M+Na<sup>+</sup>]: 303.0996, found: 303.0991.

### 3-(3-(2-methoxyphenyl)-2-oxopropyl)-7-methylisobenzofuran-1(3H)-one (3ha)

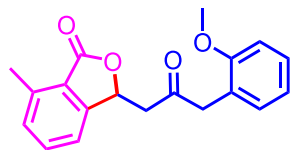

The product was synthesized by standard condition 2 in 64% yield.

**<sup>1</sup>H NMR** (500 MHz, CDCl<sub>3</sub>): δ 7.47 (t, *J* = 7.6 Hz, 1H), 7.26 - 7.24 (m, 1H), 7.24 - 7.21 (m, 2H), 7.14 (dd, *J* = 7.4, 1.6 Hz, 1H), 6.92 (td, *J* = 7.4, 1.0 Hz, 1H), 6.86 (dd, *J* = 8.5, 1.0 Hz, 1H), 5.87 (t, *J* = 6.5 Hz, 1H), 3.77 (s, 3H), 3.74 - 3.72 (m, 2H), 3.11 (dd, *J* = 17.5, 6.5 Hz, 1H), 2.84 (dd, *J* = 17.5, 6.5 Hz, 1H), 2.67 (s, 3H).

**<sup>13</sup>C NMR** (126 MHz, CDCl<sub>3</sub>): δ 205.23, 170.44, 157.34, 150.31, 139.84, 133.96, 131.38, 131.01, 129.05, 123.38, 122.78, 120.95, 119.84, 110.63, 76.04, 55.44, 46.67, 45.60, 17.46.

**ESI-MS** calcd. for C<sub>19</sub>H<sub>18</sub>O<sub>4</sub>H [M+H<sup>+</sup>]: 311.1283, found: 311.1287.

### 7-methyl-3-(3-(naphthalen-1-yl)-2-oxopropyl)isobenzofuran-1(3H)-one (3ia)

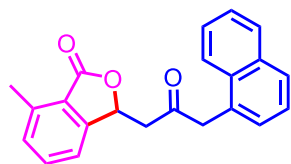

The product was synthesized by standard condition 2 in 76% yield.

**<sup>1</sup>H NMR** (500 MHz, CDCl<sub>3</sub>): δ 7.91 - 7.84 (m, 2H), 7.80 (d, *J* = 8.0 Hz, 1H), 7.58 - 7.48 (m, 2H), 7.45 - 7.35 (m, 3H), 7.22 (d, *J* = 7.5 Hz, 1H), 7.09 (d, *J* = 7.6 Hz, 1H), 5.82 (t, *J* = 6.5 Hz, 1H), 4.23 (d, *J* = 16.0 Hz, 1H), 4.18 (d, *J* = 16.0 Hz, 1H), 3.05 (dd, *J* = 17.5, 7.0 Hz, 1H), 2.79 (dd, *J* = 17.5, 7.0 Hz, 1H), 2.65 (s, 3H).

**<sup>13</sup>C NMR** (126 MHz, CDCl<sub>3</sub>): δ 205.02, 170.23, 149.87, 139.91, 134.06, 133.98, 132.20, 131.06, 130.02, 129.02, 128.63, 128.55, 126.89, 126.19, 125.73, 123.74, 123.31, 119.57, 75.95, 49.15, 46.32, 17.42.

**ESI-MS** calcd. for C<sub>22</sub>H<sub>18</sub>O<sub>3</sub>Na [M+Na<sup>+</sup>]: 353.1153, found: 353.1158.

### 7-methyl-3-(2-oxo-3-phenoxypropyl)isobenzofuran-1(3H)-one (3ja)

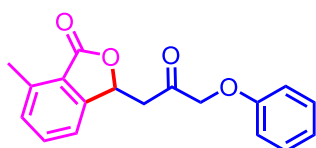

The product was synthesized by standard condition 2 in 78% yield.

**<sup>1</sup>H NMR** (500 MHz, CDCl<sub>3</sub>): δ 7.52 (t, *J* = 7.6 Hz, 1H), 7.35 - 7.21 (m, 4H), 7.00 (dd, *J* = 7.5, 1.0 Hz, 1H), 6.89 - 6.85 (m, 2H), 5.92 (t, *J* = 6.5 Hz, 1H), 4.65 (d, *J* = 16.5 Hz, 1H), 4.61 (d, *J* = 16.5 Hz, 1H), 3.27 (dd, *J* = 18.0, 7.5 Hz, 1H), 3.09 (dd, *J* = 18.0, 6.0 Hz, 1H), 2.68 (s, 3H).

**<sup>13</sup>C NMR** (126 MHz, CDCl<sub>3</sub>): δ 204.15, 170.07, 157.42, 149.65, 140.02, 134.06, 131.15, 129.81, 123.29, 122.05, 119.45, 114.50, 75.25, 73.01, 44.41, 17.37.

**ESI-MS** calcd. for C<sub>18</sub>H<sub>16</sub>O<sub>4</sub>Na [M+Na<sup>+</sup>]: 319.0946, found: 319.0951.

### 3-(2-cyclopropyl-2-oxoethyl)-7-methylisobenzofuran-1(3H)-one (3ka)

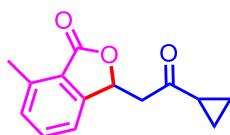

The product was synthesized by standard condition 1 for 48h in 52% yield.

**<sup>1</sup>H NMR** (500 MHz, CDCl<sub>3</sub>): δ 7.50 (t, *J* = 7.5 Hz, 1H), 7.27 (d, *J* = 7.5 Hz, 1H), 7.24 (d, *J* = 7.5 Hz, 1H), 5.88 (t, *J* = 6.5 Hz, 1H), 3.22 (dd, *J* = 17.0, 6.5 Hz, 1H), 3.02 (dd, *J* = 17.0, 6.0 Hz, 1H), 2.68 (s, 3H), 1.97 (dd, *J* = 8.0, 4.5 Hz, 1H), 1.18 - 1.08 (m, 2H), 1.02 - 0.91 (m, 2H).

**<sup>13</sup>C NMR** (126 MHz, CDCl<sub>3</sub>): δ 206.72, 170.31, 150.07, 139.82, 133.93, 130.96, 123.32, 119.62, 75.88, 48.05, 21.27, 17.35, 11.56, 11.48.

**ESI-MS** calcd. for C<sub>14</sub>H<sub>14</sub>O<sub>3</sub>Na [M+Na<sup>+</sup>]: 253.0840, found: 253.0847.

### 3-(2-cyclobutyl-2-oxoethyl)-7-methylisobenzofuran-1(3H)-one (3la)

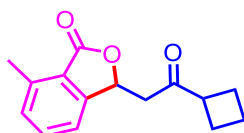

The product was synthesized by standard condition 1 for 48h in 71% yield.

**<sup>1</sup>H NMR** (500 MHz, CDCl<sub>3</sub>): δ 7.50 (t, *J* = 7.5 Hz, 1H), 7.27 (d, *J* = 7.5 Hz, 1H), 7.24 (d, *J* = 7.5 Hz, 1H), 5.88 (t, *J* = 6.5 Hz, 1H), 3.30 (p, *J* = 8.6 Hz, 1H), 2.99 (dd, *J* = 17.5, 7.0 Hz, 1H), 2.79 (dd, *J* = 17.5, 6.0 Hz, 1H), 2.67 (s, 3H), 2.36 - 2.10 (m, 4H), 2.02 - 1.93 (m, 1H), 1.89 - 1.80 (m, 1H).

**<sup>13</sup>C NMR** (126 MHz, CDCl<sub>3</sub>): δ 207.18, 169.78, 149.63, 139.38, 133.46, 130.49, 122.82, 118.99, 75.44, 45.35, 44.39, 23.59, 17.17, 16.87.

**ESI-MS** calcd. for C<sub>15</sub>H<sub>16</sub>O<sub>3</sub>Na [M+Na<sup>+</sup>]: 267.0996, found: 267.1001.

### 3-(2-cyclopentyl-2-oxoethyl)-7-methylisobenzofuran-1(3H)-one (3ma)

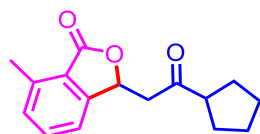

The product was synthesized by standard condition 1 for 48h in 72% yield.

**<sup>1</sup>H NMR** (500 MHz, CDCl<sub>3</sub>): δ 7.50 (t, *J* = 7.5 Hz, 1H), 7.26 (d, *J* = 7.5 Hz, 1H), 7.23 (d, *J* = 7.5 Hz, 1H), 5.90 (t, *J* = 6.5 Hz, 1H), 3.10 (dd, *J* = 17.5, 7.0 Hz, 1H), 2.95 - 2.82 (m, 2H), 2.68 (s, 3H), 1.87 - 1.54 (m, 8H).

**<sup>13</sup>C NMR** (126 MHz, CDCl<sub>3</sub>): δ 209.15, 170.41, 150.32, 139.96, 134.05, 131.06, 123.45, 119.61, 76.18, 52.06, 46.68, 28.76, 28.59, 26.12, 26.08, 17.47.

**ESI-MS** calcd. for C<sub>16</sub>H<sub>18</sub>O<sub>3</sub>Na [M+Na<sup>+</sup>]: 281.1153, found: 281.1149.

### 7-methyl-3-(2-oxo-2-(tetrahydro-2H-pyran-4-yl)ethyl)isobenzofuran-1(3H)-one (3na)

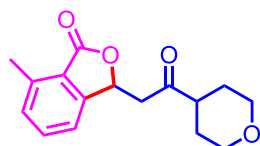

The product was synthesized by standard condition 1 for 48h in 77% yield.

**<sup>1</sup>H NMR** (500 MHz, CDCl<sub>3</sub>): δ 7.50 (t, *J* = 7.5 Hz, 1H), 7.27 (d, *J* = 7.5 Hz, 1H), 7.22 (d, *J* = 7.5 Hz, 1H), 5.88 (t, *J* = 6.5 Hz, 1H), 4.03 - 3.95 (m, 2H), 3.44 - 3.38 (m, 2H), 3.09 (dd, *J* = 17.5, 7.0 Hz, 1H), 2.87 (dd, *J* = 17.5, 6.0 Hz, 1H), 2.67 (s, 3H), 2.60 (tt, *J* = 11.2, 4.2 Hz, 1H), 1.83 - 1.63 (m, 4H).

**<sup>13</sup>C NMR** (126 MHz, CDCl<sub>3</sub>): δ 208.02, 170.26, 150.06, 140.05, 134.12, 131.17, 123.39, 119.52, 76.01, 67.17, 48.16, 45.39, 27.98, 17.45.

**ESI-MS** calcd. for C<sub>16</sub>H<sub>18</sub>O<sub>4</sub>H [M+H<sup>+</sup>]: 275.1283, found: 275.1290.

### 7-methyl-3-(2-oxotridecyl)isobenzofuran-1(3H)-one (3oa)

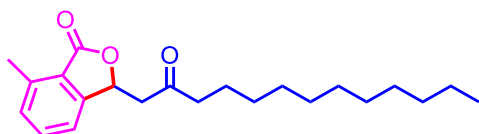

The product was synthesized by standard condition 1 for 48h in 63% yield.

**<sup>1</sup>H NMR** (500 MHz, CDCl<sub>3</sub>): δ 7.50 (t, *J* = 7.5 Hz, 1H), 7.27 (d, *J* = 7.5 Hz, 2H), 7.23 (d, *J* = 7.5 Hz, 1H), 5.87 (t, *J* = 6.5 Hz, 1H), 3.04 (dd, *J* = 17.5, 7.0 Hz, 1H), 2.84 (dd, *J* = 17.5, 6.0 Hz, 1H), 2.68 (s, 3H), 2.56 - 2.39 (m, 2H), 1.63 - 1.57 (m, 2H), 1.31 - 1.22 (m, 16H), 0.87 (t, *J* = 6.9 Hz, 3H).

**<sup>13</sup>C NMR** (126 MHz, CDCl<sub>3</sub>): δ 207.12, 170.23, 150.06, 139.88, 133.94, 130.98, 123.30, 119.49, 75.93, 47.46, 43.70, 31.90, 29.59, 29.44, 29.37, 29.33, 29.11, 23.52, 22.68, 17.34, 14.11.

**ESI-MS** calcd. for C<sub>22</sub>H<sub>32</sub>O<sub>3</sub>Na [M+Na<sup>+</sup>]: 367.2248, found: 367.2241.

### 3-(2-oxo-2-phenylethyl)-7-phenylisobenzofuran-1(3H)-one (3ab)

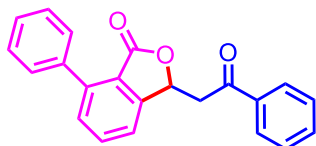

The product was synthesized by standard condition 2 in 69% yield.

**<sup>1</sup>H NMR** (600 MHz, CDCl<sub>3</sub>): δ 8.01 - 7.95 (m, 2H), 7.68 (t, *J* = 7.5 Hz, 1H), 7.64 - 7.58 (m, 1H), 7.57 - 7.52 (m, 3H), 7.52 - 7.40 (m, 6H), 6.17 (t, *J* = 6.6 Hz, 1H), 3.78 (dd, *J* = 17.4, 6.0 Hz, 1H), 3.45 (dd, *J* = 17.4, 6.6 Hz, 1H).

**<sup>13</sup>C NMR** (151 MHz, CDCl<sub>3</sub>): δ 196.28, 169.03, 151.20, 142.94, 136.48, 136.34, 134.21, 133.99, 131.35, 129.66, 128.96, 128.52, 128.32, 128.12, 121.97, 121.55, 75.77, 44.06.

**ESI-MS** calcd. for C<sub>22</sub>H<sub>16</sub>O<sub>3</sub>Na [M+Na<sup>+</sup>]: 351.0996, found: 351.1001.

### 3-(2-oxo-2-phenylethyl)-6-phenylisobenzofuran-1(3H)-one (3ac)

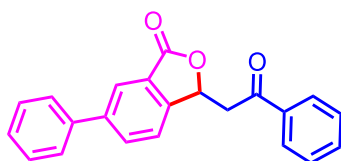

The product was synthesized by standard condition 2 in 40% yield.

**<sup>1</sup>H NMR** (500 MHz, CDCl<sub>3</sub>): δ 8.12 (d, *J* = 1.6 Hz, 1H), 8.00 - 7.96 (m, 2H), 7.88 (dd, *J* = 8.0, 1.7 Hz, 1H), 7.66 - 7.59 (m, 4H), 7.54 - 7.45 (m, 4H), 7.44 - 7.38 (m, 1H), 6.27 - 6.19 (m, 1H), 3.84 (dd, *J* = 17.7, 5.6 Hz, 1H), 3.44 (dd, *J* = 17.6, 7.6 Hz, 1H).

**<sup>13</sup>C NMR** (126 MHz, CDCl<sub>3</sub>): δ 196.26, 170.30, 148.64, 143.21, 139.49, 136.27, 134.08, 133.55, 129.25, 129.01, 128.33, 127.39, 126.79, 124.11, 123.44, 77.35, 43.91.

**ESI-MS** calcd. for C<sub>22</sub>H<sub>16</sub>O<sub>3</sub>Na [M+Na<sup>+</sup>]: 351.0996, found: 351.1001.

**7-fluoro-3-(2-oxo-2-phenylethyl)isobenzofuran-1(3H)-one (3ad)**

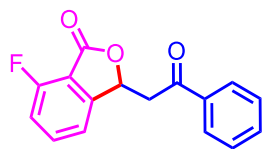

The product was synthesized by standard condition 2 in 52% yield.

**<sup>1</sup>H NMR** (600 MHz, CDCl<sub>3</sub>): δ 8.00 - 7.94 (m, 2H), 7.72 - 7.59 (m, 2H), 7.53 - 7.49 (m, 2H), 7.38 (d, *J* = 7.8 Hz, 1H), 7.19 (t, *J* = 8.5 Hz, 1H), 6.18 (d, *J* = 7.2 Hz, 1H), 3.81 (dd, *J* = 17.4, 6.0 Hz, 1H), 3.43 (dd, *J* = 17.4, 7.0 Hz, 1H).

**<sup>13</sup>C NMR** (151 MHz, CDCl<sub>3</sub>): δ 195.92, 166.32, 159.77 (d, *J* = 264.8 Hz), 152.45, 137.01 (d, *J* = 7.8 Hz), 136.13, 134.15, 129.03, 128.30, 118.95 (d, *J* = 4.4 Hz), 116.59 (d, *J* = 18.7 Hz), 113.91 (d, *J* = 14.4 Hz), 76.98, 43.70.

**JESI-MS** calcd. for C<sub>16</sub>H<sub>11</sub>FO<sub>3</sub>H [M+H<sup>+</sup>]: 271.0770, found: 271.0764.

**<sup>19</sup>F NMR** (500 MHz, CDCl<sub>3</sub>): δ -113.95.

**7-chloro-3-(2-oxo-2-phenylethyl)isobenzofuran-1(3H)-one (3ae)**

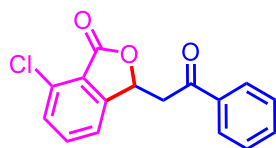

The product was synthesized by standard condition 2 in 77% yield.

**<sup>1</sup>H NMR** (500 MHz, CDCl<sub>3</sub>): δ 7.97 - 7.93 (m, 2H), 7.64 - 7.54 (m, 2H), 7.52 - 7.45 (m, 4H), 6.14 - 6.10 (m, 1H), 3.78 (dd, *J* = 17.5, 5.5 Hz, 1H), 3.39 (dd, *J* = 17.5, 7.0 Hz, 1H).

**<sup>13</sup>C NMR** (126 MHz, CDCl<sub>3</sub>): δ 195.98, 167.17, 152.25, 136.17, 135.37, 134.14, 133.55, 131.00, 129.03, 128.31, 122.76, 121.42, 75.94, 43.75.

**ESI-MS** calcd. for C<sub>16</sub>H<sub>11</sub>ClO<sub>3</sub>Na [M+Na<sup>+</sup>]: 309.0294, found: 309.0291.

**3-(2-oxo-2-phenylethyl)-7-(trifluoromethyl)isobenzofuran-1(3H)-one (3af)**

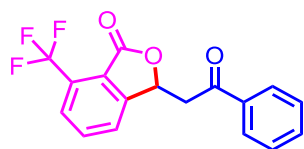

The product was synthesized by method 2 in 68% yield.

**<sup>1</sup>H NMR** (500 MHz, CDCl<sub>3</sub>): δ 7.98 - 7.93 (m, 2H), 7.86 - 7.81 (m, 2H), 7.80 - 7.75 (m, 1H), 7.64 - 7.60 (m, 1H), 7.52 - 7.46 (m, 2H), 6.19 (dd, *J* = 7.5, 5.0 Hz, 1H), 3.84 (dd, *J* = 17.8, 5.5 Hz, 1H), 3.42 (dd, *J* = 17.8, 7 Hz, 1H).

$^{13}\text{C}$  NMR (126 MHz,  $\text{CDCl}_3$ ):  $\delta$  195.99, 166.13, 152.28, 136.09, 134.34, 134.22, 129.05, 128.84 (q,  $J = 35.3$  Hz), 128.31, 127.16 (q,  $J = 5.4$  Hz), 126.86, 123.40, 122.31 (q,  $J = 274.5$  Hz), 76.59, 43.64.

**ESI-MS** calcd. for  $\text{C}_{17}\text{H}_{11}\text{F}_3\text{O}_3\text{Na}$  [ $\text{M}+\text{Na}^+$ ]: 343.0557, found: 343.0551.

$^{19}\text{F}$  NMR (500 MHz,  $\text{CDCl}_3$ ):  $\delta$  -60.97.

### 7-methoxy-3-(2-oxo-2-phenylethyl)isobenzofuran-1(3H)-one (3ag)

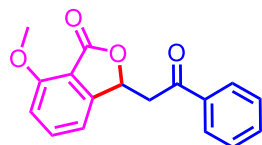

The product was synthesized by standard condition 2 in 60% yield.

$^1\text{H}$  NMR (500 MHz,  $\text{CDCl}_3$ ):  $\delta$  7.96 - 7.92 (m, 2H), 7.62 - 7.56 (m, 2H), 7.51 - 7.43 (m, 2H), 7.07 (d,  $J = 8.0$  Hz, 1H), 6.94 (d,  $J = 8.0$  Hz, 1H), 6.08 (t,  $J = 6.5$  Hz, 1H), 3.99 (s, 3H), 3.71 (dd,  $J = 17.5, 6.0$  Hz, 1H), 3.37 (dd,  $J = 17.5, 7.0$  Hz, 1H).

$^{13}\text{C}$  NMR (126 MHz,  $\text{CDCl}_3$ ):  $\delta$  196.16, 168.26, 158.79, 152.68, 136.63, 136.40, 133.93, 128.95, 128.31, 114.40, 113.46, 111.15, 76.15, 56.17, 43.91.

**ESI-MS** calcd. for  $\text{C}_{17}\text{H}_{14}\text{O}_4\text{H}$  [ $\text{M}+\text{H}^+$ ]: 283.0970, found: 283.0966.

### 5-methoxy-3-(2-oxo-2-phenylethyl)isobenzofuran-1(3H)-one (3ah)

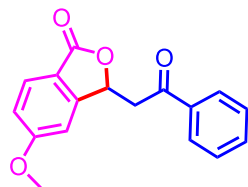

The product was synthesized by standard condition 2 in 20% yield.

$^1\text{H}$  NMR (500 MHz,  $\text{CDCl}_3$ ):  $\delta$  7.98 - 7.94 (m, 2H), 7.81 (d,  $J = 8.4$  Hz, 1H), 7.64 - 7.58 (m, 1H), 7.50 (t,  $J = 7.8$  Hz, 2H), 7.08 - 6.97 (m, 2H), 6.14 - 6.03 (m, 1H), 3.87 (s, 3H), 3.80 (dd,  $J = 17.7, 5.5$  Hz, 1H), 3.38 (dd,  $J = 17.7, 7.6$  Hz, 1H).

$^{13}\text{C}$  NMR (126 MHz,  $\text{CDCl}_3$ ):  $\delta$  196.43, 170.07, 164.98, 152.76, 136.29, 134.05, 129.00, 128.31, 127.38, 118.20, 117.07, 106.89, 76.65, 56.00, 43.98.

**ESI-MS** calcd. for  $\text{C}_{17}\text{H}_{14}\text{O}_4\text{H}$  [ $\text{M}+\text{H}^+$ ]: 283.0970, found: 283.0966.

### 5-methoxy-3-(2-oxo-2-phenylethyl)-7-(3-oxo-3-phenylpropyl)isobenzofuran-1(3H)-one (3ah')

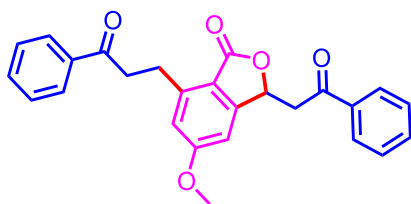

The product was synthesized by standard condition 2 in 31% yield.

**<sup>1</sup>H NMR** (500 MHz, CDCl<sub>3</sub>): δ 8.01 – 7.93 (m, 4H), 7.63 – 7.58 (m, 1H), 7.57 – 7.52 (m, 1H), 7.51 – 7.40 (m, 4H), 6.95 (d, *J* = 2.1 Hz, 1H), 6.86 – 6.81 (m, 1H), 6.09 – 6.02 (m, 1H), 3.85 (s, 3H), 3.75 (dd, *J* = 17.6, 5.9 Hz, 1H), 3.48 – 3.32 (m, 5H).

**<sup>13</sup>C NMR** (126 MHz, CDCl<sub>3</sub>): δ 199.19, 196.39, 169.91, 164.73, 153.67, 144.79, 136.84, 136.35, 134.00, 133.24, 128.98, 128.72, 128.33, 128.32, 118.00, 115.61, 105.12, 76.05, 55.96, 44.08, 39.39, 26.63.

**ESI-MS** calcd. for C<sub>26</sub>H<sub>22</sub>O<sub>3</sub>H [M+H<sup>+</sup>]: ,found: 415.1545, found: 415.1551.

### 6,7-dimethoxy-3-(2-oxo-2-phenylethyl)isobenzofuran-1(3H)-one (3ai)

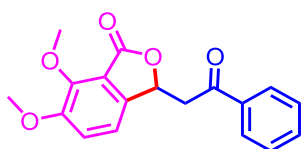

The product was synthesized by standard condition 2 in 55% yield.

**<sup>1</sup>H NMR** (500 MHz, CDCl<sub>3</sub>): δ 7.88 - 7.83 (m, 2H), 7.53 - 7.45 (m, 1H), 7.41 - 7.34 (m, 2H), 7.12 - 7.01 (m, 2H), 5.94 (d, *J* = 6.5 Hz, 1H), 4.00 (s, 3H), 3.80 (s, 3H), 3.62 (dd, *J* = 17.5, 5.5 Hz, 1H), 3.25 (dd, *J* = 17.5, 7.5 Hz, 1H).

**<sup>13</sup>C NMR** (126 MHz, CDCl<sub>3</sub>): δ 196.28, 167.62, 152.79, 148.37, 142.71, 136.28, 133.83, 128.83, 128.17, 119.53, 118.14, 117.31, 75.90, 62.38, 56.88, 44.15.

**ESI-MS** calcd. for C<sub>18</sub>H<sub>16</sub>O<sub>5</sub>Na [M+Na<sup>+</sup>]: 335.0895, found: 335.0890.

### 6-fluoro-7-methoxy-3-(2-oxo-2-phenylethyl)isobenzofuran-1(3H)-one (3aj)

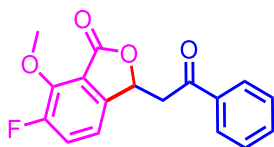

The product was synthesized by standard condition 2 in 86% yield.

**<sup>1</sup>H NMR** (500 MHz, CDCl<sub>3</sub>): δ 8.00 - 7.94 (m, 2H), 7.63 (t, *J* = 7.4 Hz, 1H), 7.51 (t, *J* = 7.8 Hz, 2H), 7.38 (dd, *J* = 12.0, 8.5 Hz, 1H), 7.16 (dd, *J* = 8.5, 3.4 Hz, 1H), 6.08 (d, *J* = 6.5 Hz, 1H), 4.22 (d, *J* = 2.5 Hz, 3H), 3.77 (dd, *J* = 17.5, 5.5 Hz, 1H), 3.40 (dd, *J* = 17.5, 7.5 Hz, 1H).

**<sup>13</sup>C NMR** (126 MHz, CDCl<sub>3</sub>): δ 196.11, 167.02, 155.24, 153.27, 146.87, 136.20, 134.06, 128.98, 128.27, 123.89 (d, *J* = 21.9 Hz), 118.43 (d, *J* = 3.9 Hz), 116.77 (d, *J* = 7.7 Hz), 75.99, 62.47 (d, *J* = 5.4 Hz), 43.91.

ESI-MS calcd. for C<sub>17</sub>H<sub>13</sub>FO<sub>4</sub>H [M+H<sup>+</sup>]: 301.0876, found: 301.0880.

<sup>19</sup>F NMR (500 MHz, CDCl<sub>3</sub>): -131.14.

**5,6-dimethoxy-3-(2-oxo-2-phenylethyl)isobenzofuran-1(3H)-one (3ak)**

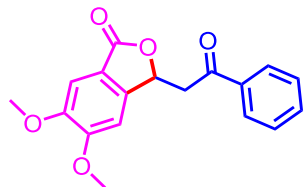

The product was synthesized by standard condition 2 in 50% yield.

<sup>1</sup>H NMR (500 MHz, CDCl<sub>3</sub>): δ 7.99 – 7.95 (m, 2H), 7.64 – 7.59 (m, 1H), 7.50 (t, *J* = 7.8 Hz, 2H), 7.29 (s, 1H), 7.01 (s, 1H), 6.10 – 6.01 (m, 1H), 3.94 (s, 6H), 3.82 (dd, *J* = 17.7, 5.2 Hz, 1H), 3.35 (dd, *J* = 17.7, 8.0 Hz, 1H).

<sup>13</sup>C NMR (126 MHz, CDCl<sub>3</sub>): δ 196.77, 170.65, 154.96, 150.77, 144.57, 136.28, 134.08, 129.01, 128.29, 117.84, 106.12, 104.57, 76.83, 56.55, 56.44, 44.10.

ESI-MS calcd. for C<sub>18</sub>H<sub>16</sub>O<sub>5</sub>Na [M+Na<sup>+</sup>]: 335.0895, found: 335.0890.

**3-(2-oxo-2-phenylethyl)-4,5,6,7-tetrahydroisobenzofuran-1(3H)-one (3al)**

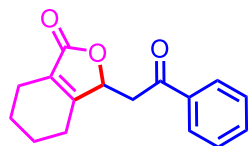

The product was synthesized by standard condition 2 in 66% yield.

<sup>1</sup>H NMR (500 MHz, CDCl<sub>3</sub>): δ 7.95 - 7.90 (m, 2H), 7.62 - 7.57 (m, 1H), 7.51 - 7.44 (m, 2H), 5.53 - 5.48 (m, 1H), 3.41 (dd, *J* = 17.1, 6.7 Hz, 1H), 3.22 (dd, *J* = 17.1, 6.0 Hz, 1H), 2.38 - 2.30 (m, 1H), 2.27 - 2.18 (m, 3H), 1.79 - 1.62 (m, 4H).

<sup>13</sup>C NMR (126 MHz, CDCl<sub>3</sub>): δ 196.05, 173.19, 163.69, 136.50, 133.91, 128.95, 128.35, 127.19, 78.96, 41.40, 23.72, 21.74, 21.61, 20.12.

ESI-MS calcd. for C<sub>16</sub>H<sub>16</sub>O<sub>3</sub>Na [M+Na<sup>+</sup>]: 279.0996, found: 279.1001.

**5-(2-oxo-2-phenylethyl)-3,4-dihydro-2H-furo[3,4-b]pyran-7(5H)-one (3am)**

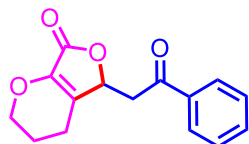

The product was synthesized by standard condition 2 in 66% yield.

<sup>1</sup>H NMR (500 MHz, CDCl<sub>3</sub>): δ 7.97 - 7.92 (m, 2H), 7.64 - 7.58 (m, 1H), 7.51 - 7.46 (m, 2H), 5.56 - 5.52 (m, 1H), 4.27 - 4.20 (m, 1H), 4.16 - 4.09 (m, 1H), 3.54 (dd, *J* = 17.2, 5.9 Hz, 1H), 3.24 (dd,



$J = 17.2, 7.0$  Hz, 1H), 2.43 (dt,  $J = 18.4, 5.5$  Hz, 1H), 2.23 (dt,  $J = 18.4, 6.6$  Hz, 1H), 2.02 - 1.95 (m, 2H).

$^{13}\text{C}$  NMR (126 MHz,  $\text{CDCl}_3$ ):  $\delta$  196.12, 166.72, 141.49, 136.36, 134.02, 133.86, 129.00, 128.33, 76.77, 67.88, 42.29, 21.38, 20.25.Z

ESI-MS calcd. for  $\text{C}_{15}\text{H}_{14}\text{O}_4\text{Na}$  [ $\text{M}+\text{Na}^+$ ]: 281.0789, found: 281.0795.

### 7-(2-oxo-2-phenylethyl)-2,3-dihydro-[1,4]dioxino[2,3-e]isobenzofuran-9(7H)-one (3an)

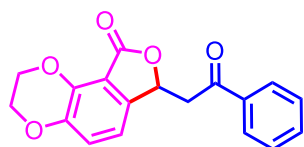

The product was synthesized by standard condition 2 in 32% yield.

$^1\text{H}$  NMR (500 MHz,  $\text{CDCl}_3$ ):  $\delta$  7.99 - 7.89 (m, 2H), 7.63 - 7.56 (m, 1H), 7.52 - 7.46 (m, 2H), 7.13 (d,  $J = 8.0$  Hz, 1H), 6.94 (dd,  $J = 8.0, 0.9$  Hz, 1H), 6.06 - 6.01 (m, 1H), 4.47 - 4.42 (m, 2H), 4.34 - 4.29 (m, 2H), 3.71 (dd,  $J = 17.5, 5.5$  Hz, 1H), 3.34 (dd,  $J = 17.5, 7.0$  Hz, 1H).

$^{13}\text{C}$  NMR (126 MHz,  $\text{CDCl}_3$ ):  $\delta$  196.31, 168.00, 144.10, 143.98, 142.60, 136.43, 133.95, 128.96, 128.31, 124.32, 114.71, 114.06, 76.41, 65.19, 64.26, 44.14.

ESI-MS calcd. for  $\text{C}_{18}\text{H}_{14}\text{O}_5\text{Na}$  [ $\text{M}+\text{Na}^+$ ]: 333.0738, found: 333.0733.

### 3,4-dimethyl-5-(2-oxo-2-phenylethyl)furan-2(5H)-one (3ao)

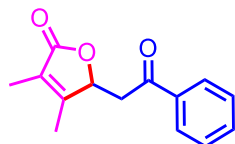

The product was synthesized by standard condition 2 in 72% yield.

$^1\text{H}$  NMR (600 MHz,  $\text{CDCl}_3$ ):  $\delta$  7.99 - 7.82 (m, 2H), 7.67 - 7.56 (m, 1H), 7.54 - 7.42 (m, 2H), 5.45 (t,  $J = 6.1$  Hz, 1H), 3.33 (dd,  $J = 17.4, 7.2$  Hz, 1H), 3.25 (dd,  $J = 17.4, 5.2$  Hz, 1H), 1.99 (s, 3H), 1.83 (s, 3H).

$^{13}\text{C}$  NMR (151 MHz,  $\text{CDCl}_3$ )  $\delta$  195.99, 174.15, 159.03, 136.47, 133.89, 128.92, 128.35, 124.19, 79.22, 41.10, 12.37, 8.69.

ESI-MS calcd. for  $\text{C}_{14}\text{H}_{14}\text{O}_3\text{Na}$  [ $\text{M}+\text{Na}^+$ ]: 253.0840, found: 253.0833.

### 3-methyl-5-(2-oxo-2-phenylethyl)furan-2(5H)-one (3ap)

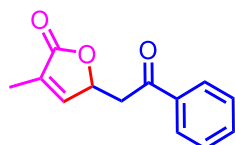

The product was synthesized by standard condition 2 in 46% yield.

**<sup>1</sup>H NMR** (500 MHz, CDCl<sub>3</sub>): δ 8.00 - 7.89 (m, 2H), 7.67 - 7.55 (m, 1H), 7.52 - 7.43 (m, 2H), 7.30 (p, *J* = 1.6 Hz, 1H), 5.54 - 5.42 (m, 1H), 3.66 (dd, *J* = 17.5, 6.0 Hz, 1H), 3.11 (dd, *J* = 17.5, 8.3 Hz, 1H), 1.93 (t, *J* = 1.8 Hz, 3H).

**<sup>13</sup>C NMR** (126 MHz, CDCl<sub>3</sub>): δ 196.20, 173.90, 148.91, 136.22, 134.02, 130.42, 128.99, 128.23, 77.33, 42.28, 10.79.

**ESI-MS** calcd. for C<sub>13</sub>H<sub>12</sub>O<sub>3</sub>Na [M+Na<sup>+</sup>]: 239.0683, found: 239.0670.

### 3-benzyl-5-(2-oxo-2-phenylethyl)furan-2(5H)-one (3aq)

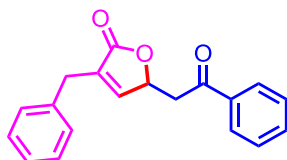

The product was synthesized by standard condition 2 in 27% yield.

**<sup>1</sup>H NMR** (500 MHz, CDCl<sub>3</sub>): δ 7.93 - 7.87 (m, 2H), 7.65 - 7.56 (m, 1H), 7.51 - 7.44 (m, 2H), 7.35 - 7.30 (m, 2H), 7.28 - 7.25 (m, 1H), 7.25 - 7.21 (m, 2H), 7.10 (q, *J* = 1.5 Hz, 1H), 5.54 - 5.45 (m, 1H), 3.69 - 3.57 (m, 3H), 3.09 (dd, *J* = 17.5, 8.5 Hz, 1H).

**<sup>13</sup>C NMR** (126 MHz, CDCl<sub>3</sub>): δ 196.01, 173.04, 149.30, 137.29, 136.10, 134.79, 134.05, 129.08, 128.98, 128.94, 128.23, 127.02, 77.62, 42.14, 31.96.

**ESI-MS** calcd. for C<sub>19</sub>H<sub>16</sub>O<sub>3</sub>Na [M+Na<sup>+</sup>]: 315.0996, found: 315.0992.

### 3-((5R)-5-((3R,5R,6S,8S,10R,13R,14S)-3,6-bis((tert-butyldimethylsilyloxy)-10,13-dimethylhexadecahydro-1H-cyclopenta[a]phenanthren-17-yl)-2-oxohexyl)-7-methylisobenzofuran-1(3H)-one (3pa)

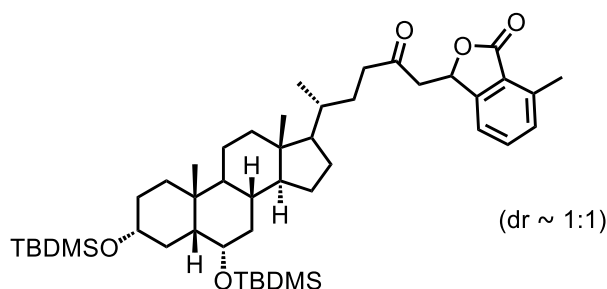

**<sup>1</sup>H NMR** (500 MHz, CDCl<sub>3</sub>): δ 7.50 (t, *J* = 7.5 Hz, 1H), 7.27 (d, *J* = 7.5 Hz, 1H), 7.23 (d, *J* = 7.5 Hz, 1H), 5.87 (t, *J* = 6.5 Hz, 1H), 4.07 - 3.92 (m, 1H), 3.57 - 3.47 (m, 1H), 3.11 - 3.01 (m, 1H), 2.90 - 2.80 (m, 1H), 2.68 (s, 3H), 2.59 - 2.33 (m, 2H), 1.97 - 1.68 (m, 4H), 1.65 - 1.51 (m, 2H), 1.53 - 1.46 (m, 1H), 1.46-1.26 (m, 10H), 1.21 - 0.99 (m, 8H), 0.90 - 0.86 (m, 24H), 0.62 (s, 3H), 0.07 - 0.01 (m, 12H).

**<sup>13</sup>C NMR** (126 MHz, CDCl<sub>3</sub>): δ 207.55, 170.35, 150.19, 140.00, 134.07, 131.11, 123.43, 119.64, 76.03, 73.08, 68.76, 56.26, 56.07, 49.70, 47.63, 47.59, 42.99, 40.70, 40.10, 39.73, 36.10, 36.06, 35.56, 35.36, 35.33, 35.02, 31.18, 29.95, 29.63, 29.57, 28.29, 26.14, 26.02, 24.33, 23.66, 20.91, 18.55, 18.25, 17.48, 12.19, -4.36, -4.49, -4.62, -4.64.

**ESI-MS** calcd. for C<sub>46</sub>H<sub>77</sub>O<sub>5</sub>Si<sub>2</sub> [M+H<sup>+</sup>]: 765.5309, found: 765.5314.

**2-(7-ethoxy-1-oxo-3-(2-oxo-2-phenylethyl)-1,3-dihydroisobenzofuran-5-yl)-*N*-((*S*)-3-methyl-1-(2-(piperidin-1-yl)phenyl)butyl)acetamide (3ar)**

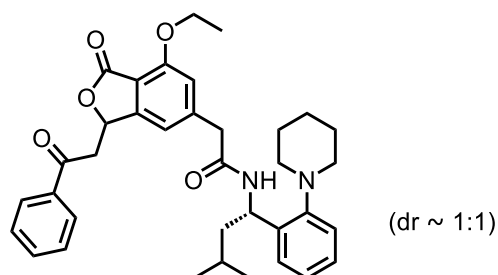

**<sup>1</sup>H NMR** (500 MHz, CDCl<sub>3</sub>): δ 7.96 - 7.90 (m, 2H), 7.64 - 7.56 (m, 1H), 7.52 - 7.43 (m, 2H), 7.23 - 7.10 (m, 3H), 7.09 - 7.02 (m, 1H), 6.94 - 6.80 (m, 2H), 6.00 (t, *J* = 6.5 Hz, 1H), 5.36 - 5.26 (m, 1H), 4.22 - 4.04 (m, 2H), 3.70 - 3.63 (m, 1H), 3.62 - 3.52 (m, 2H), 3.35 - 3.26 (m, 1H), 2.92 (s, 2H), 2.65 (s, 2H), 1.78 - 1.69 (m, 2H), 1.65 - 1.58 (m, 4H), 1.57 - 1.48 (m, 2H), 1.48 - 1.38 (m, 4H), 0.98 - 0.86 (m, 6H).

**<sup>13</sup>C NMR** (126 MHz, CDCl<sub>3</sub>): δ 196.14, 168.50, 167.83, 158.12, 153.10, 145.00, 138.53, 136.33, 133.96, 128.95, 128.32, 128.23, 125.53, 123.06, 114.81, 112.98, 112.45, 75.78, 64.74, 55.30, 50.28, 46.63, 44.56, 43.92, 29.84, 26.83, 25.48, 24.15, 22.88, 22.65, 14.56, 14.53.

**ESI-MS** calcd. for C<sub>36</sub>H<sub>43</sub>N<sub>2</sub>O<sub>5</sub> [M+H<sup>+</sup>]: 583.3172, found: 583.3167.

**2-(3-((*5R*)-5-((*3R,5R,6S,10R,13R,14S*)-3,6-bis((*tert*-butyldimethylsilyl)oxy)-10,13-dimethylhexadecahydro-1*H*-cyclopenta[*a*]phenanthren-17-yl)-2-oxohexyl)-7-ethoxy-1-oxo-1,3-dihydroisobenzofuran-5-yl)-*N*-((*S*)-3-methyl-1-(2-(piperidin-1-yl)phenyl)butyl)acetamide (4)**

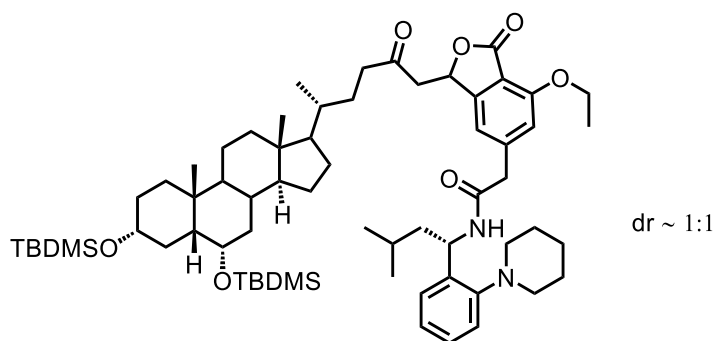

**<sup>1</sup>H NMR** (500 MHz, CDCl<sub>3</sub>): δ 7.26 - 7.19 (m, 2H), 7.16 - 7.05 (m, 2H), 7.05 - 6.97 (m, 1H), 6.89 - 6.76 (m, 2H), 5.81 - 5.74 (m, 1H), 5.42 - 5.33 (m, 1H), 4.20 - 4.04 (m, 2H), 3.99 (dt, *J* = 11.6, 4.2 Hz, 1H), 3.63 - 3.49 (m, 3H), 3.03 - 2.91 (m, 3H), 2.85 - 2.72 (m, 1H), 2.72 - 2.59 (m, 2H), 2.55 - 2.32 (m, 2H), 1.97 - 1.81 (m, 3H), 1.81 - 1.52 (m, 15H), 1.51 - 0.95 (m, 29H), 0.96 - 0.81 (m, 38H), 0.66 - 0.62 (m, 3H), 0.08 - 0.03 (m, 12H).

**<sup>13</sup>C NMR** (126 MHz, CDCl<sub>3</sub>): δ 206.75, 167.63, 167.08, 157.48, 152.28, 151.97, 144.32, 138.04, 138.00, 127.57, 127.43, 124.76, 124.72, 122.57, 113.78, 113.74, 112.38, 112.26, 111.76, 74.92,

72.45, 68.13, 64.13, 55.63, 55.45, 54.34, 49.74, 49.08, 46.88, 46.80, 46.27, 46.22, 43.93, 42.36, 40.03, 39.47, 39.10, 35.47, 35.43, 34.93, 34.74, 34.39, 30.55, 29.31, 29.19, 28.98, 28.92, 27.67, 26.32, 25.51, 25.39, 24.87, 23.70, 23.62, 23.03, 22.27, 22.07, 20.28, 17.92, 17.61, 13.92, 13.88, 11.56, -4.99, -5.12, -5.25, -5.27.

ESI-MS calcd. for C<sub>65</sub>H<sub>104</sub>N<sub>2</sub>O<sub>7</sub>Si<sub>2</sub>Na [M+Na<sup>+</sup>]: 1103.7279, found:1103.7283.

**2-(7-ethoxy-3-((S)-3-(4-isobutylphenyl)-2-oxobutyl)-1-oxo-1,3-dihydroisobenzofuran-5-yl)-N-((S)-3-methyl-1-(2-(piperidin-1-yl)phenyl)butyl)acetamide (5)**

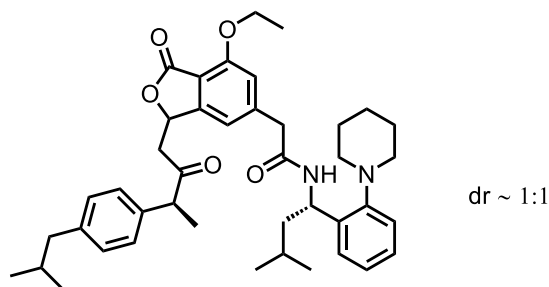

<sup>1</sup>H NMR (500 MHz, CDCl<sub>3</sub>): δ 7.26 - 7.19 (m, 2H), 7.17 - 6.96 (m, 7H), 6.86 - 6.60 (m, 2H), 5.78 - 5.66 (m, 1H), 5.45 - 5.28 (m, 1H), 4.18 - 4.00 (m, 2H), 3.82 - 3.67 (m, 1H), 3.63 - 3.43 (m, 2H), 3.06 - 2.79 (m, 3H), 2.79 - 2.57 (m, 3H), 2.51 - 2.37 (m, 2H), 1.90 - 1.69 (m, 4H), 1.68 - 1.50 (m, 6H), 1.48 - 1.37 (m, 8H), 0.97 - 0.86 (m, 13H).

<sup>13</sup>C NMR (126 MHz, CDCl<sub>3</sub>): δ 206.98, 168.26, 167.63, 157.99, 152.85, 144.87, 141.16, 138.70, 136.82, 129.97, 128.12, 127.66, 125.26, 123.07, 114.46, 114.18, 112.82, 112.21, 76.06, 75.41, 64.63, 55.33, 53.70, 53.11, 50.22, 46.82, 45.88, 45.42, 45.09, 44.45, 30.21, 26.89, 25.45, 24.21, 22.87, 22.49, 17.15, 14.49.

ESI-MS calcd. for C<sub>42</sub>H<sub>54</sub>N<sub>2</sub>O<sub>5</sub> [M+Na<sup>+</sup>]: 689.3930, found: 689.3923.

**7-((2,3-dimethylphenyl)(methyl)amino)-3-((S)-3-(4-isobutylphenyl)-2-oxobutyl)isobenzofuran-1(3H)-one (6)**

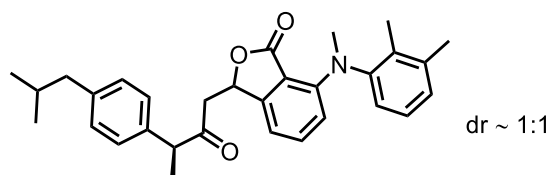

<sup>1</sup>H NMR (500 MHz, CDCl<sub>3</sub>): δ 7.25 - 7.16 (m, 1H), 7.14 - 7.07 (m, 5H), 7.07 - 7.03 (m, 1H), 6.70 - 6.55 (m, 1H), 6.49 - 6.34 (m, 1H), 5.82 - 5.67 (m, 1H), 3.85 - 3.71 (m, 1H), 3.51 - 3.40 (m, 3H), 3.07 - 2.87 (m, 1H), 2.85 - 2.64 (m, 1H), 2.51 - 2.39 (m, 2H), 2.29 (s, 3H), 2.04 (s, 3H), 1.91 - 1.79 (m, 1H), 1.46 - 1.37 (m, 3H), 0.91 - 0.86 (m, 6H).

<sup>13</sup>C NMR (126 MHz, CDCl<sub>3</sub>): δ 207.29, 168.25, 152.74, 150.79, 147.46, 141.11, 138.79, 136.96, 134.66, 134.13, 129.95, 127.88, 127.75, 126.55, 123.45, 118.29, 112.24, 111.62, 75.66, 75.13, 53.68, 53.23, 46.45, 45.94, 45.12, 43.76, 30.26, 22.50, 20.64, 17.22, 14.40.

**ESI-MS** calcd. for  $C_{31}H_{35}NO_3Na$  [ $M+Na^+$ ]: 492.2514, found: 492.2520.

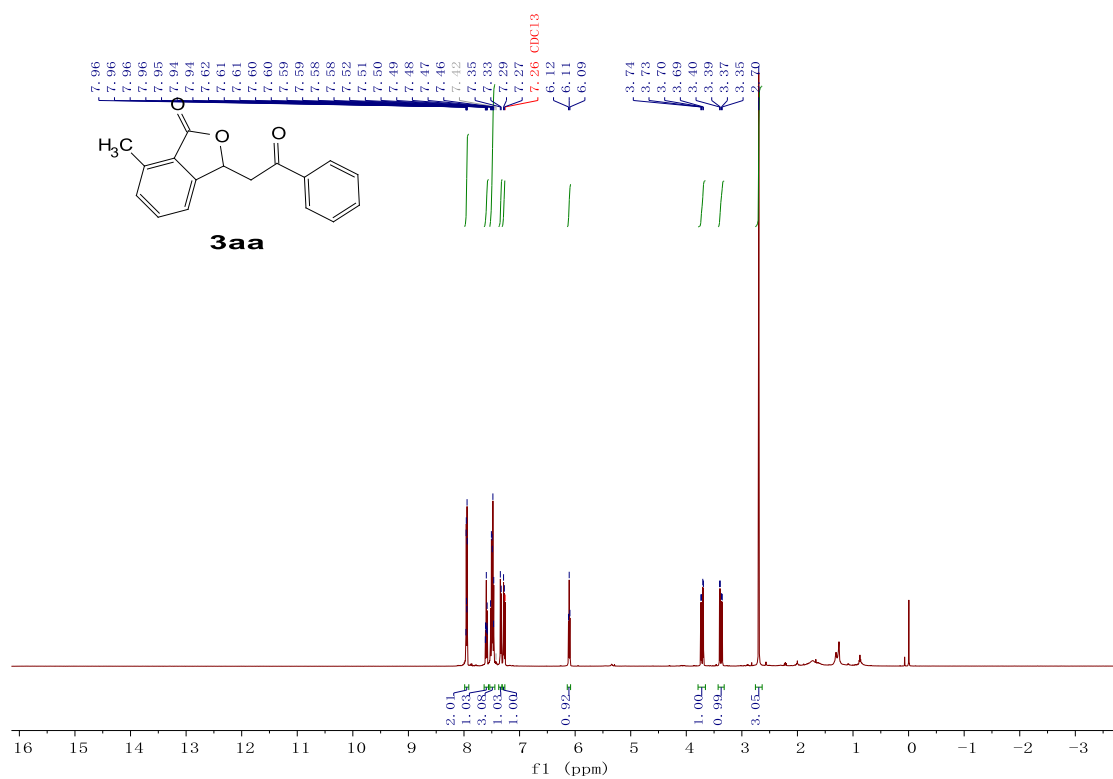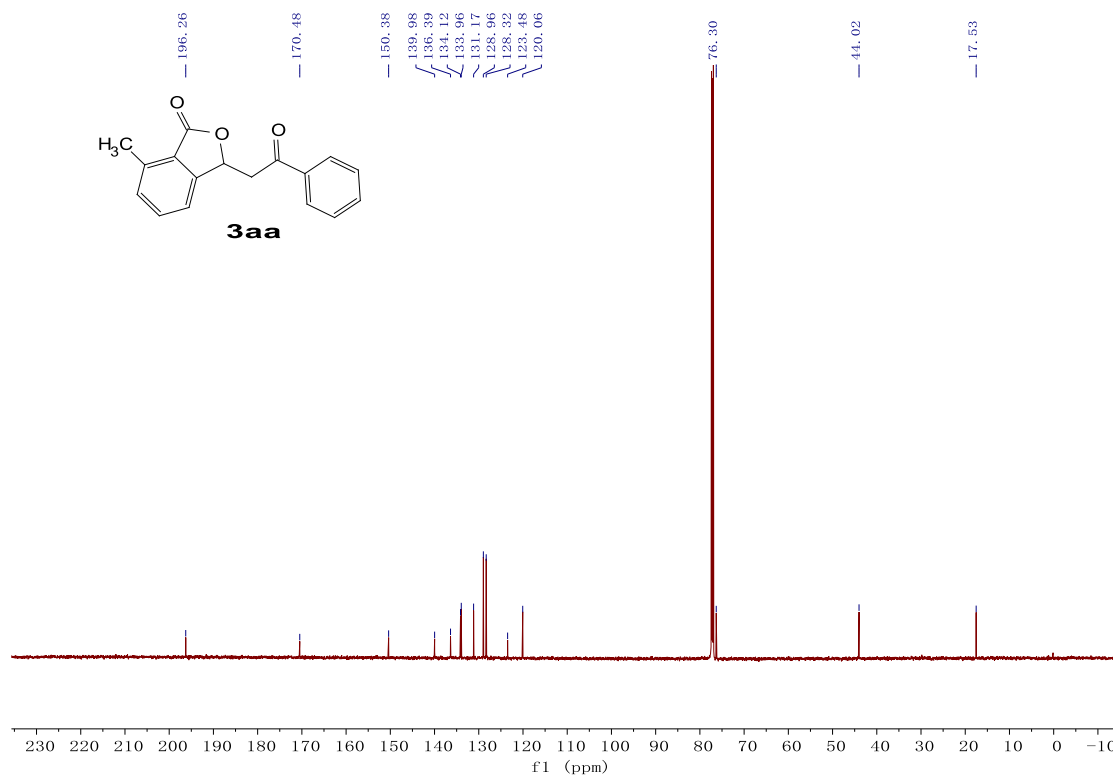

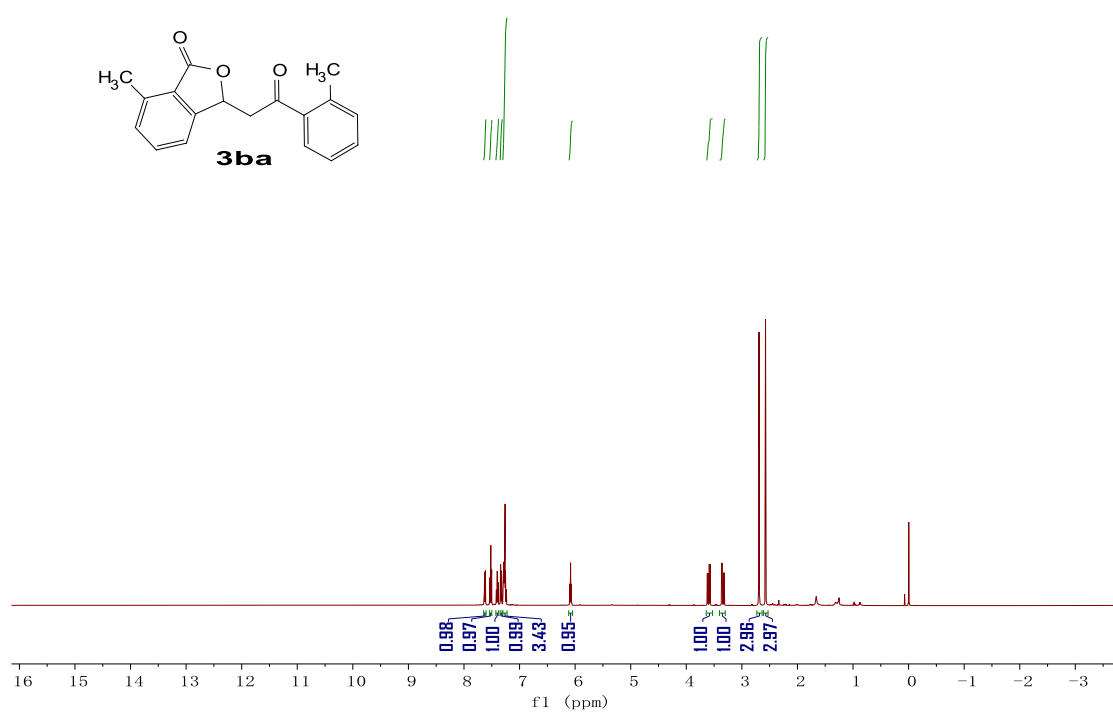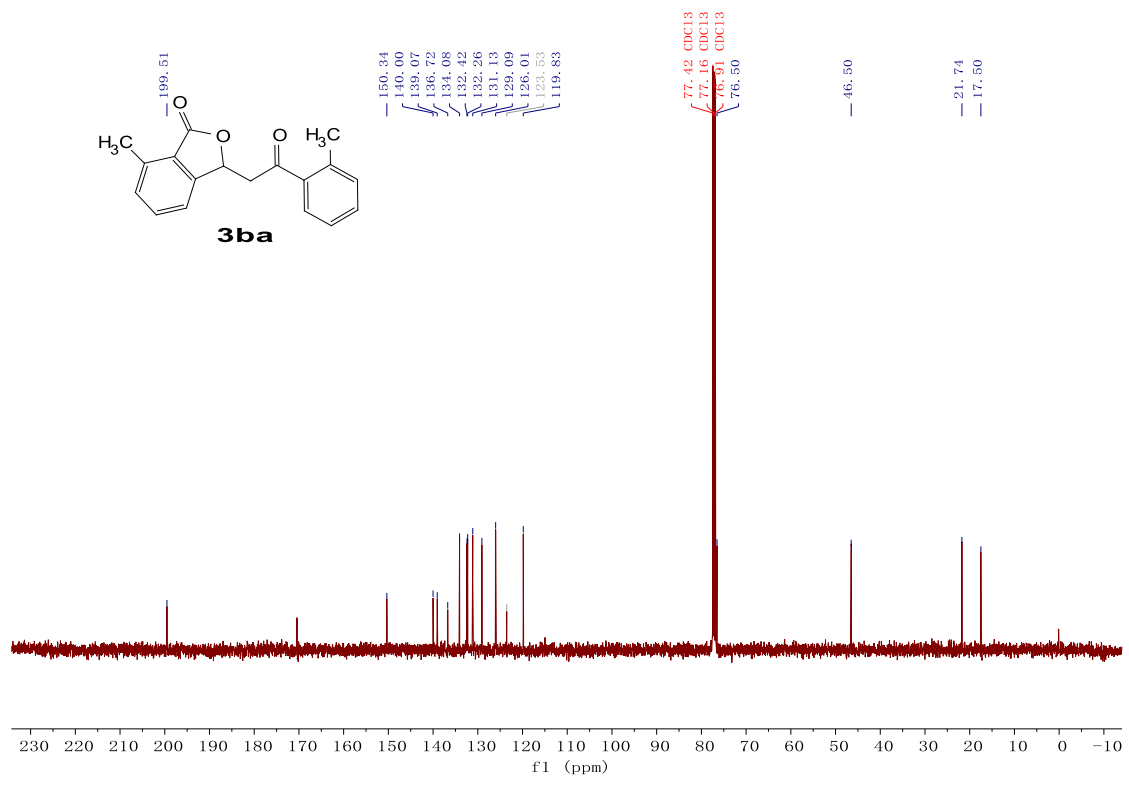

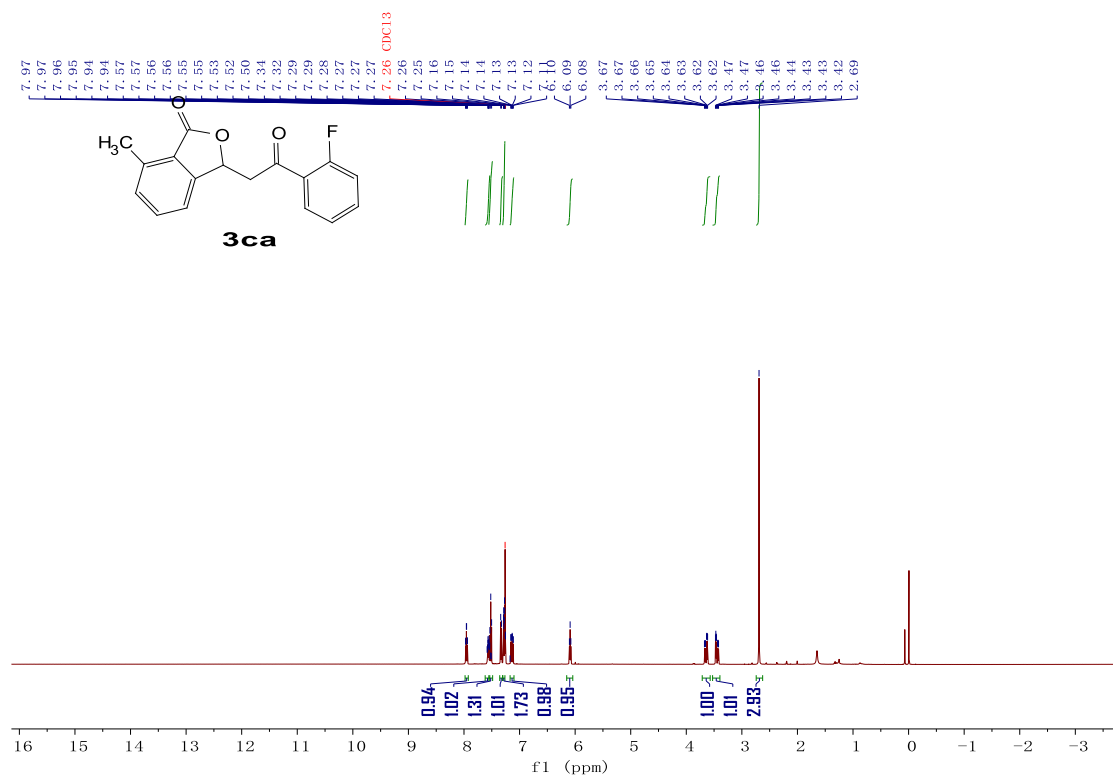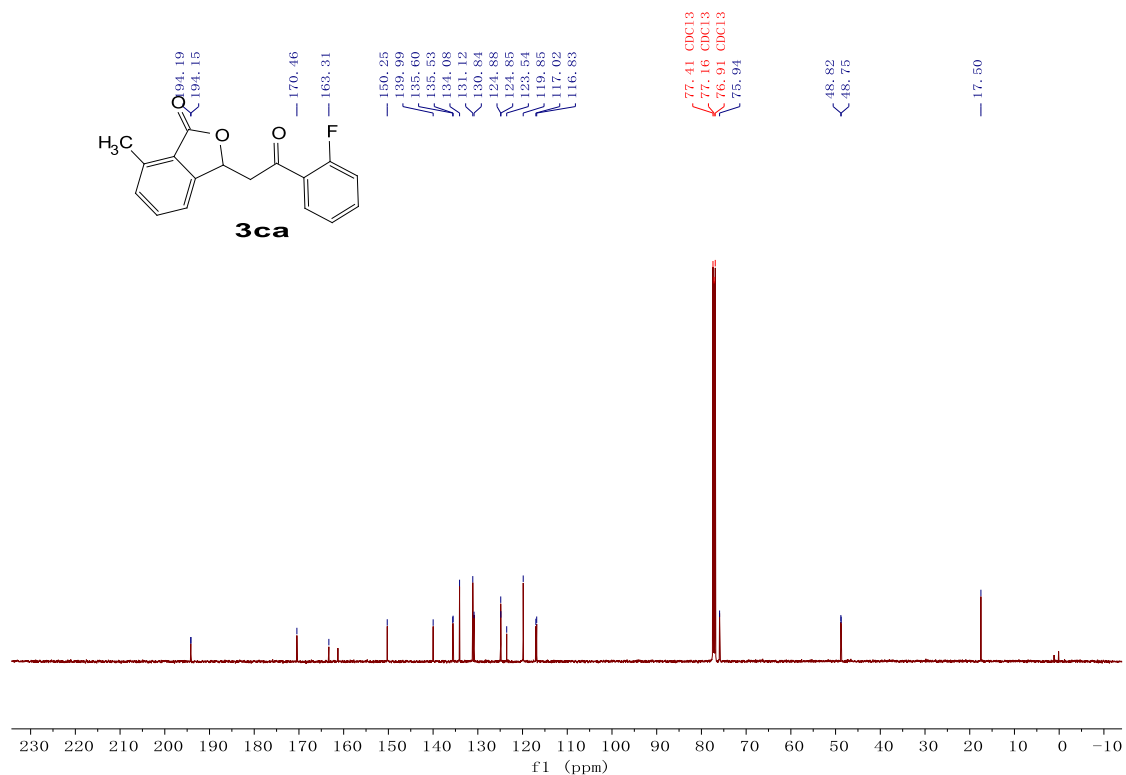



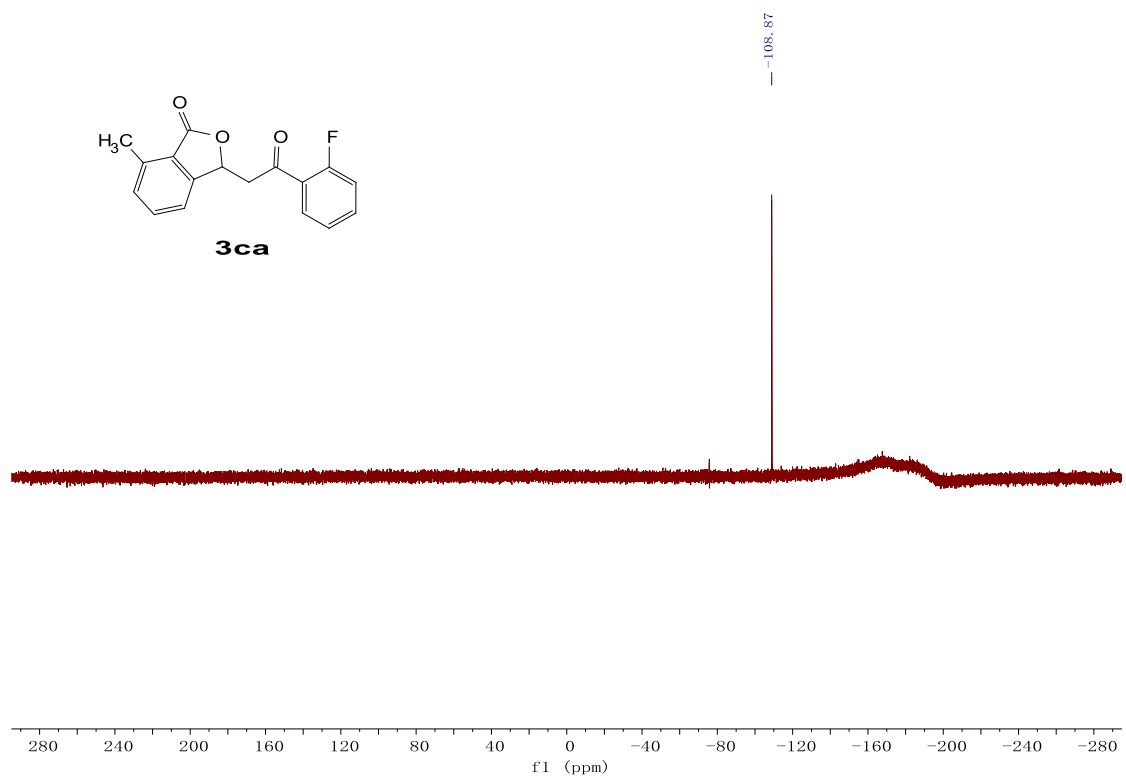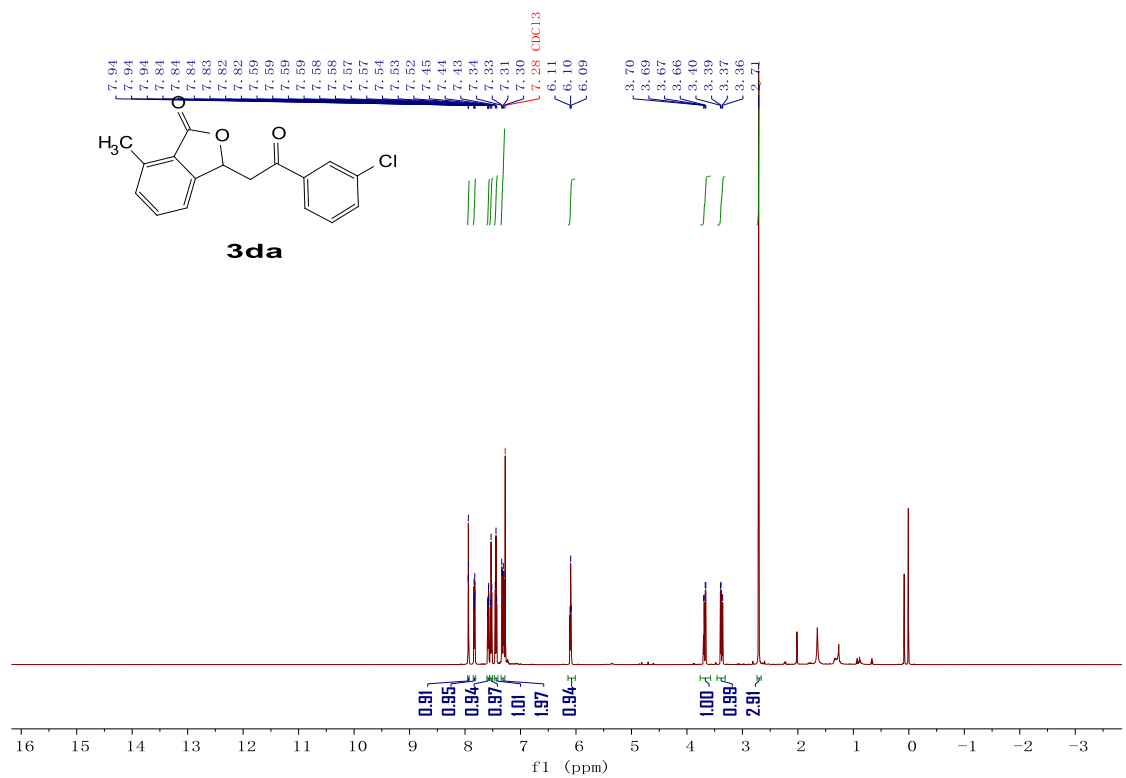

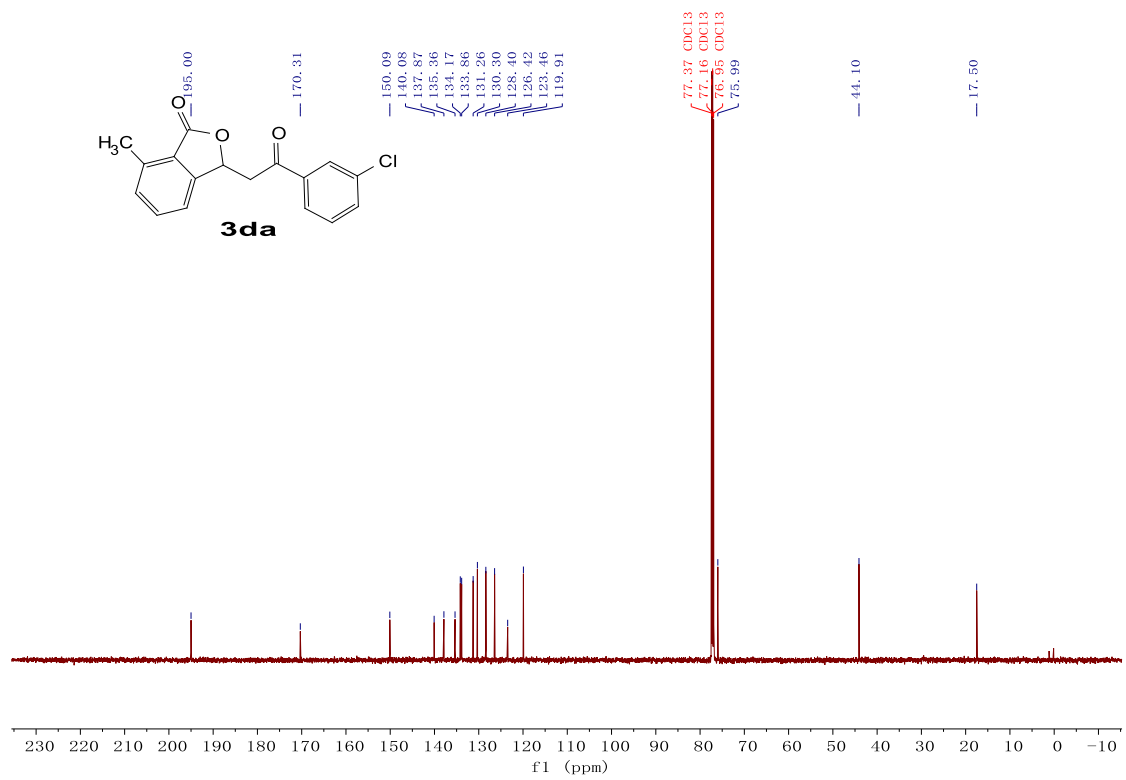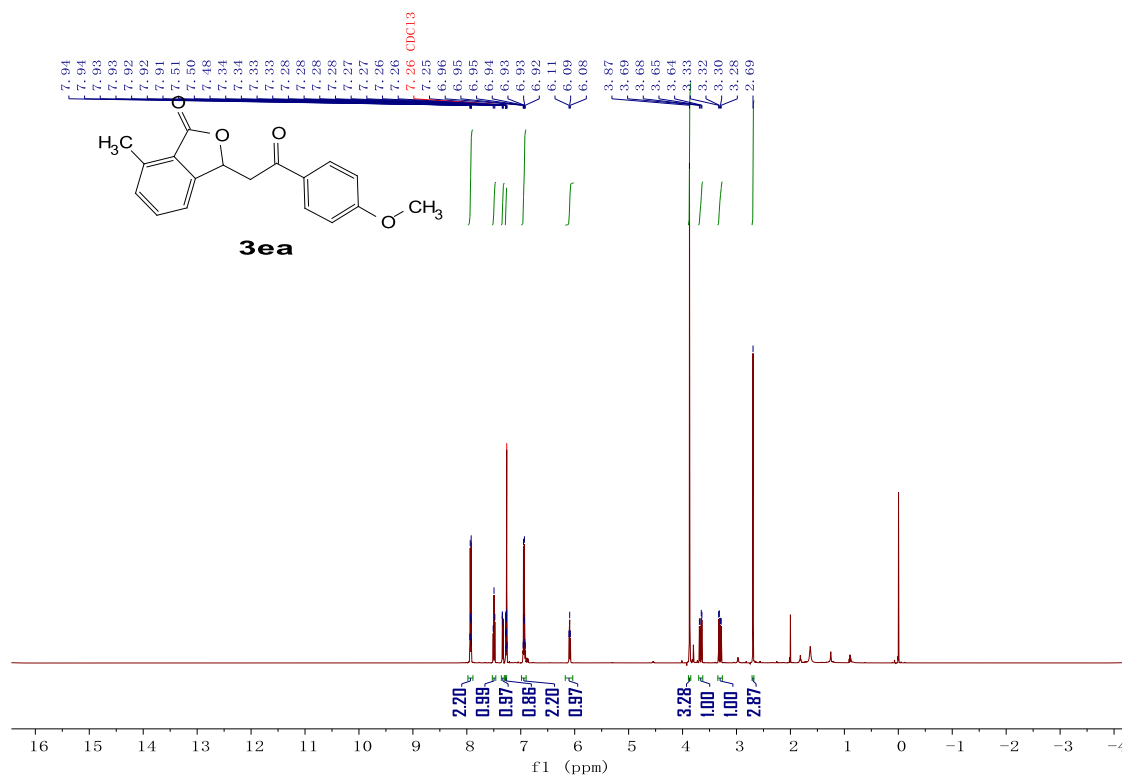

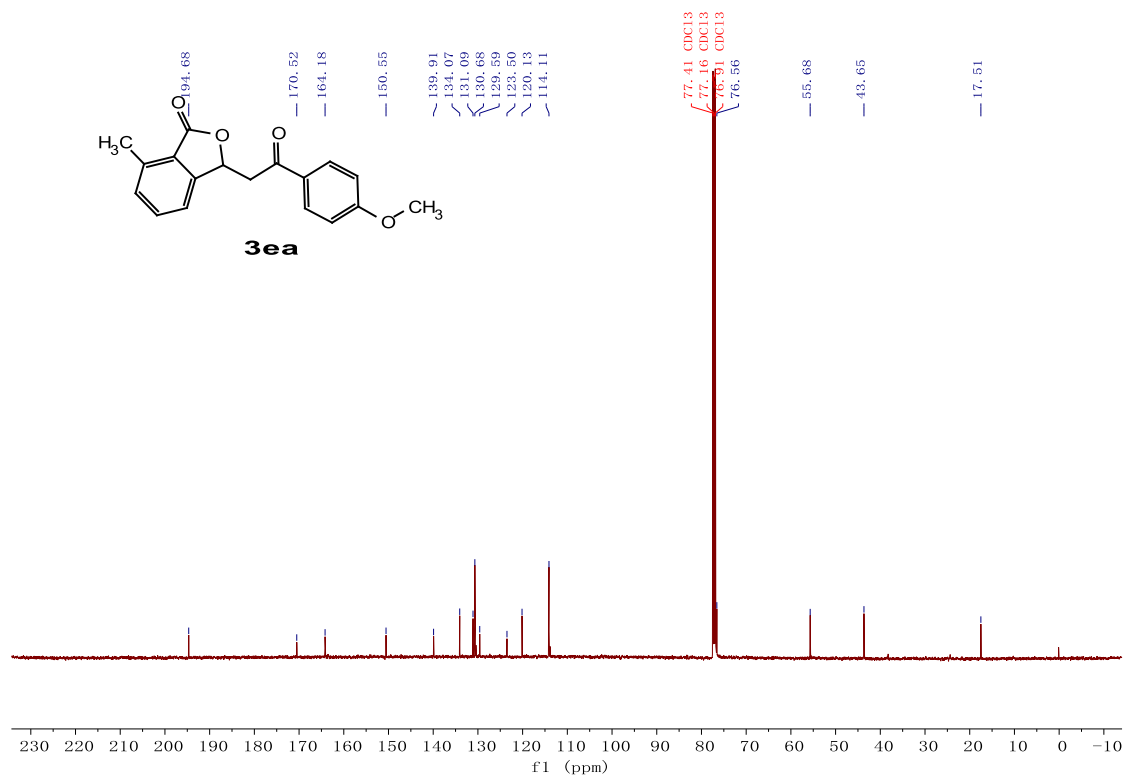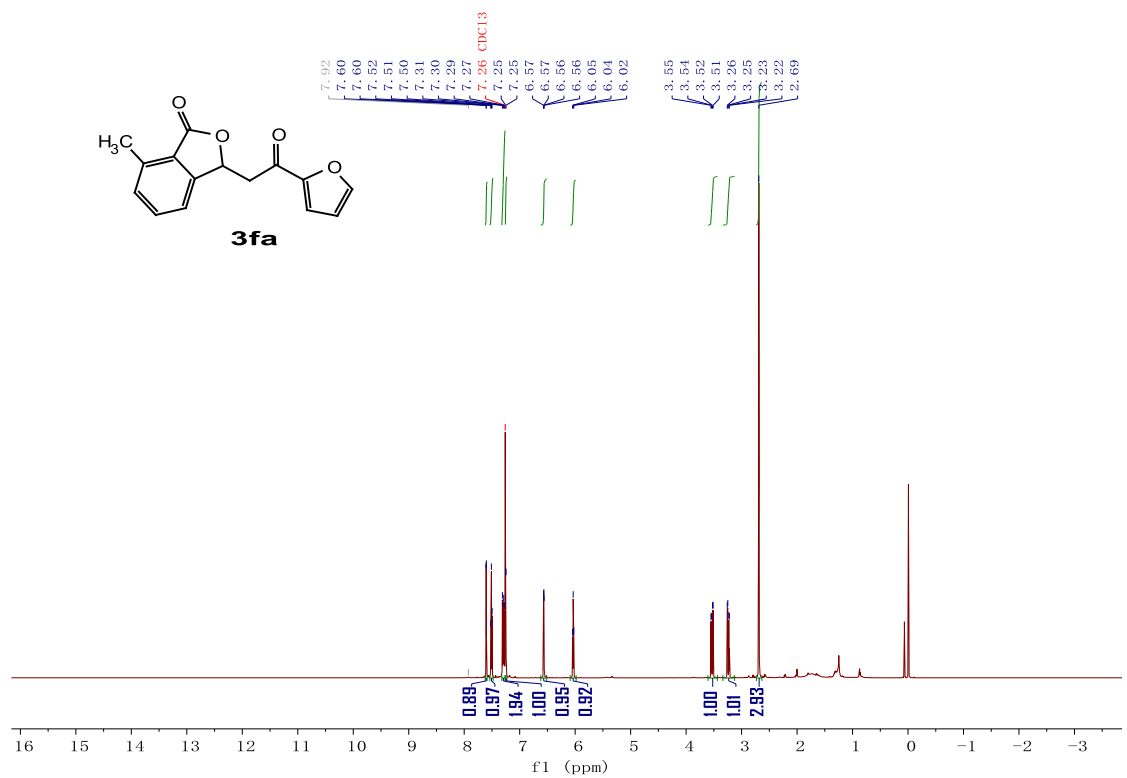

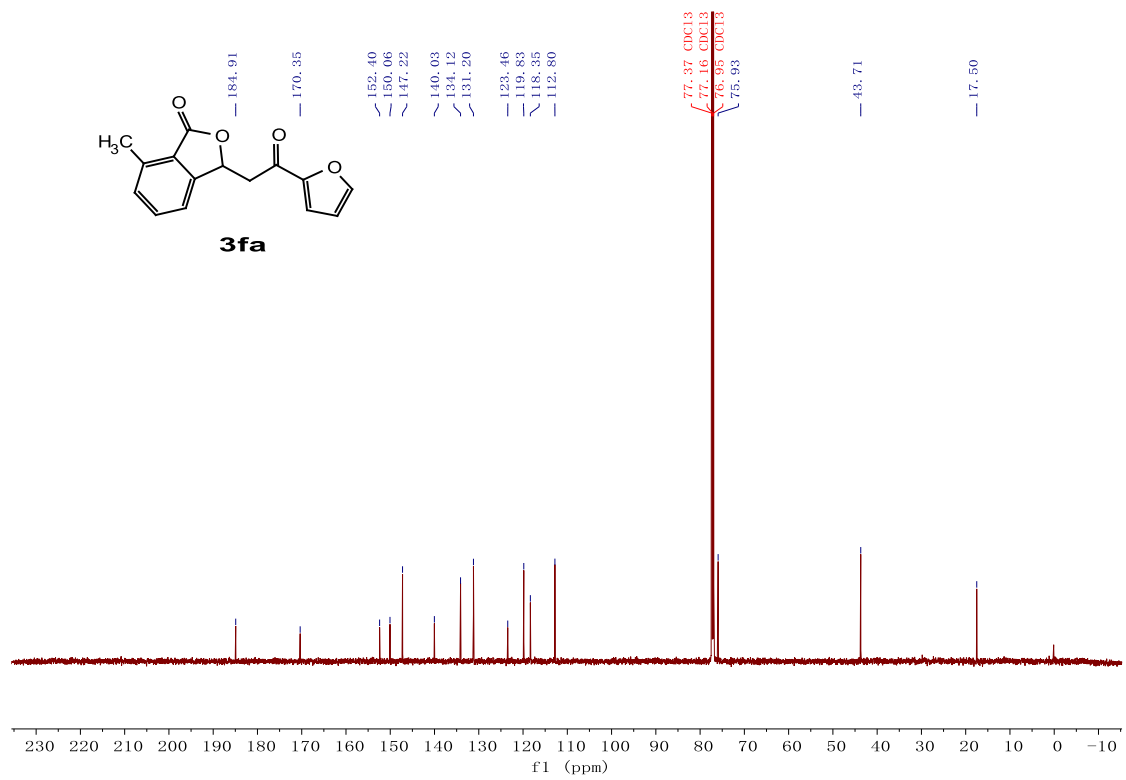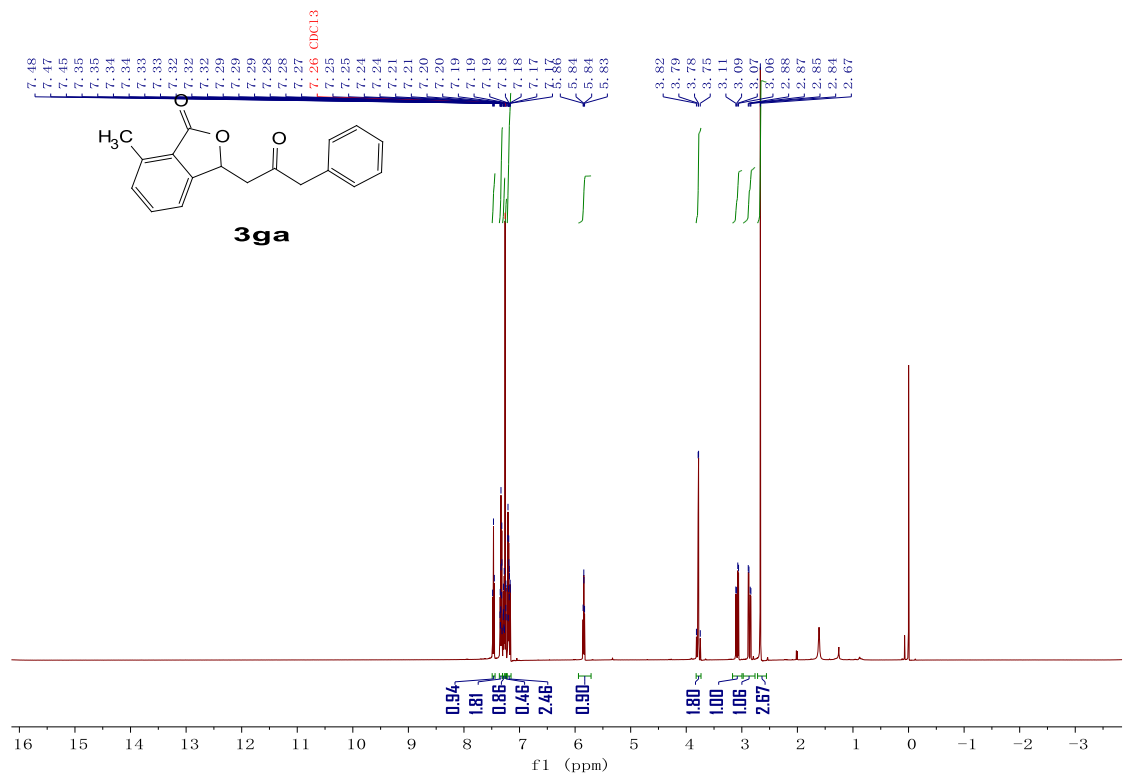

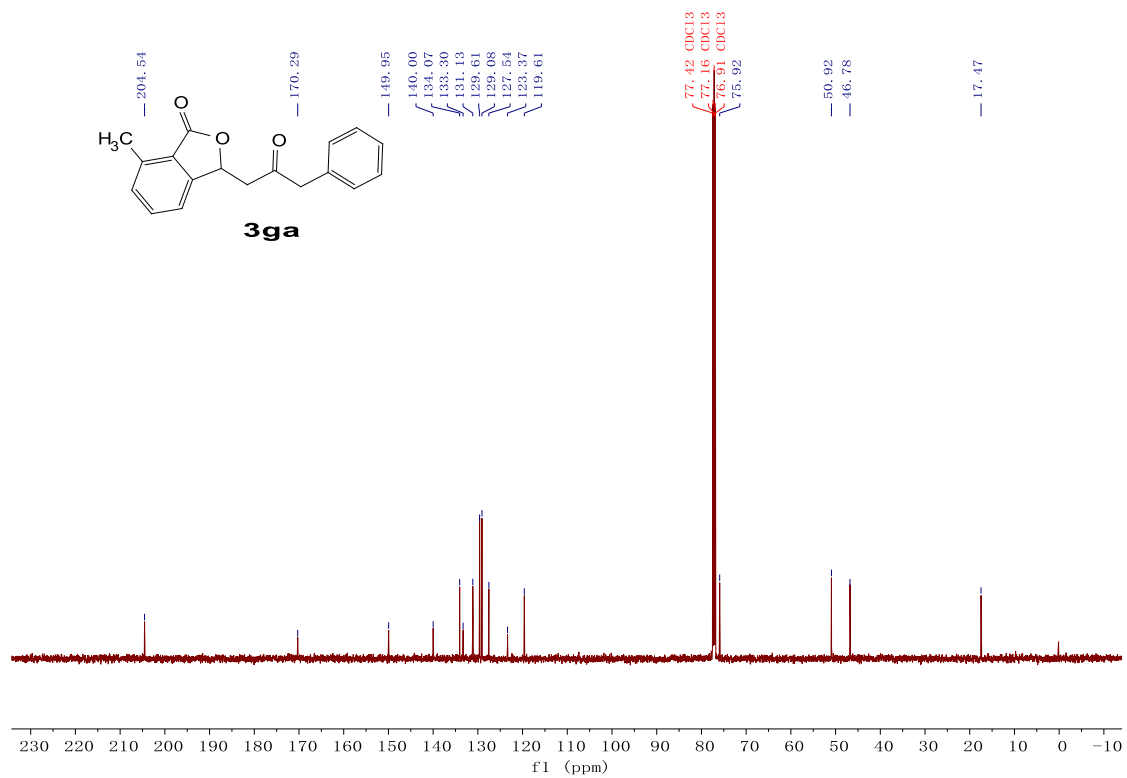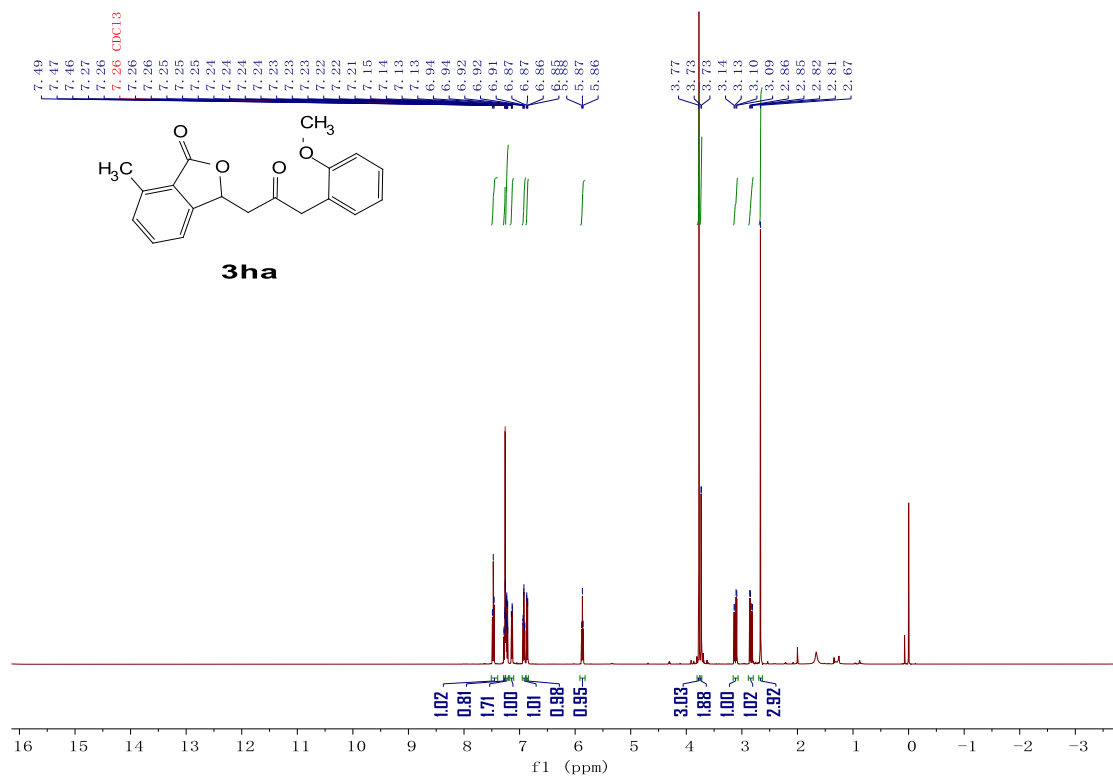

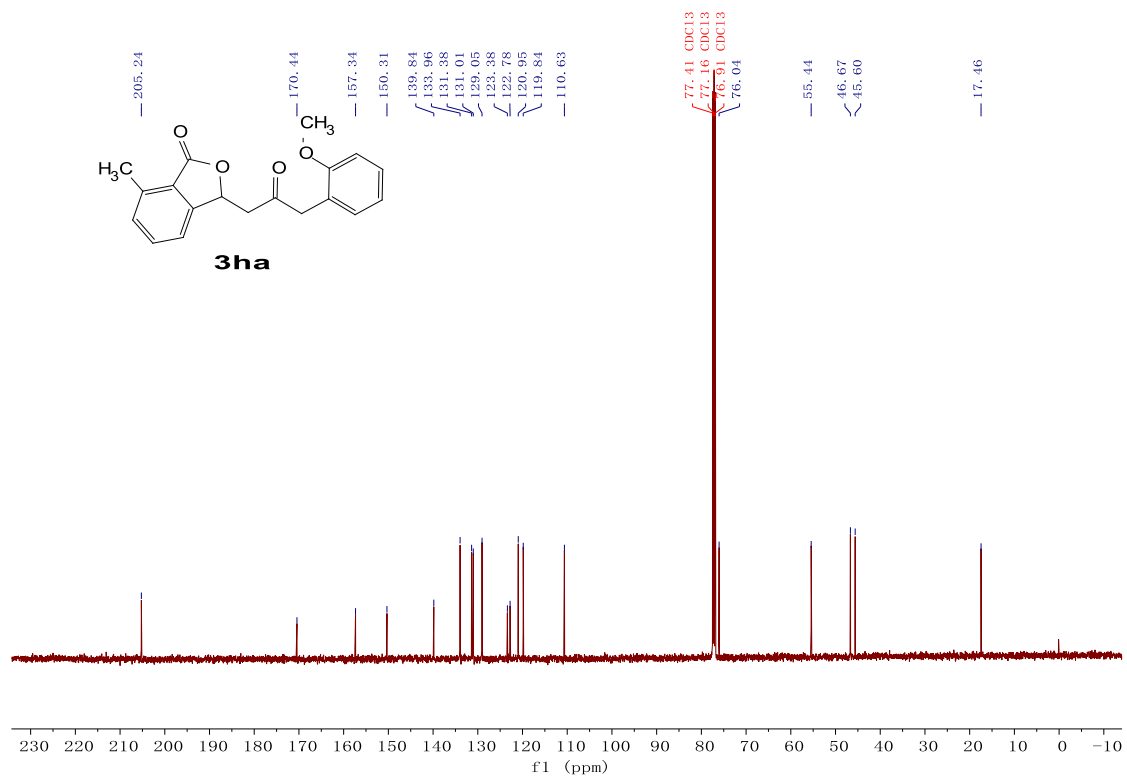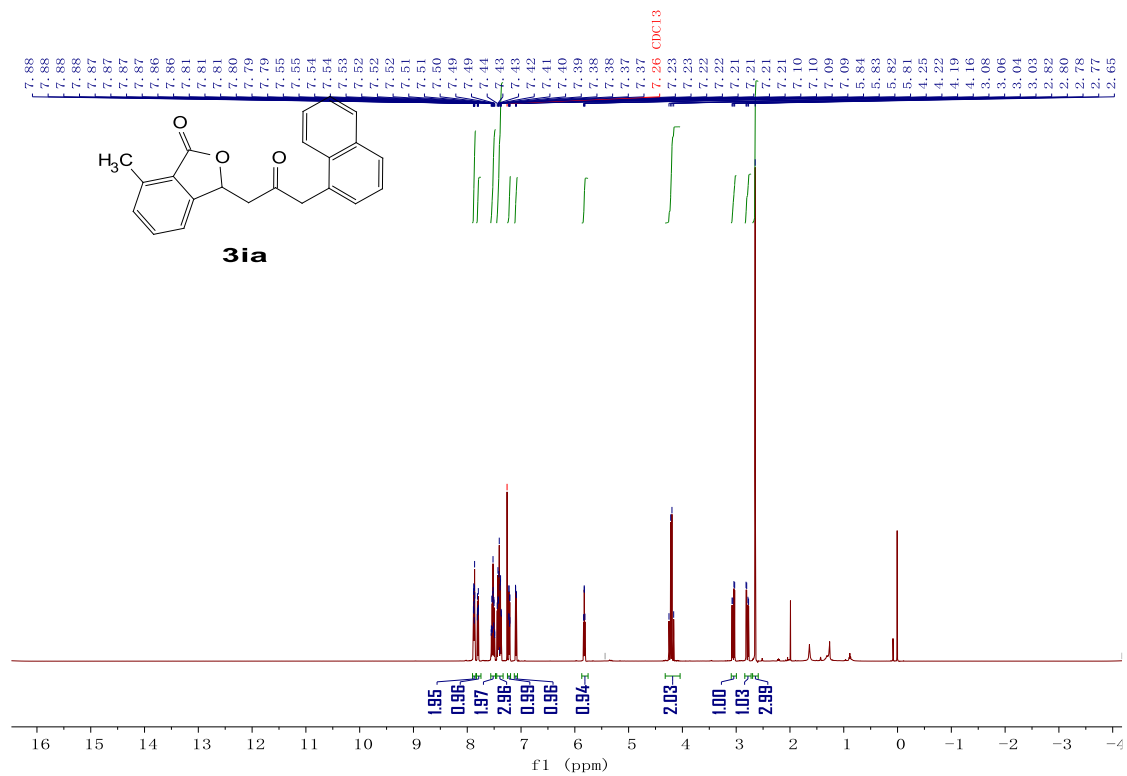

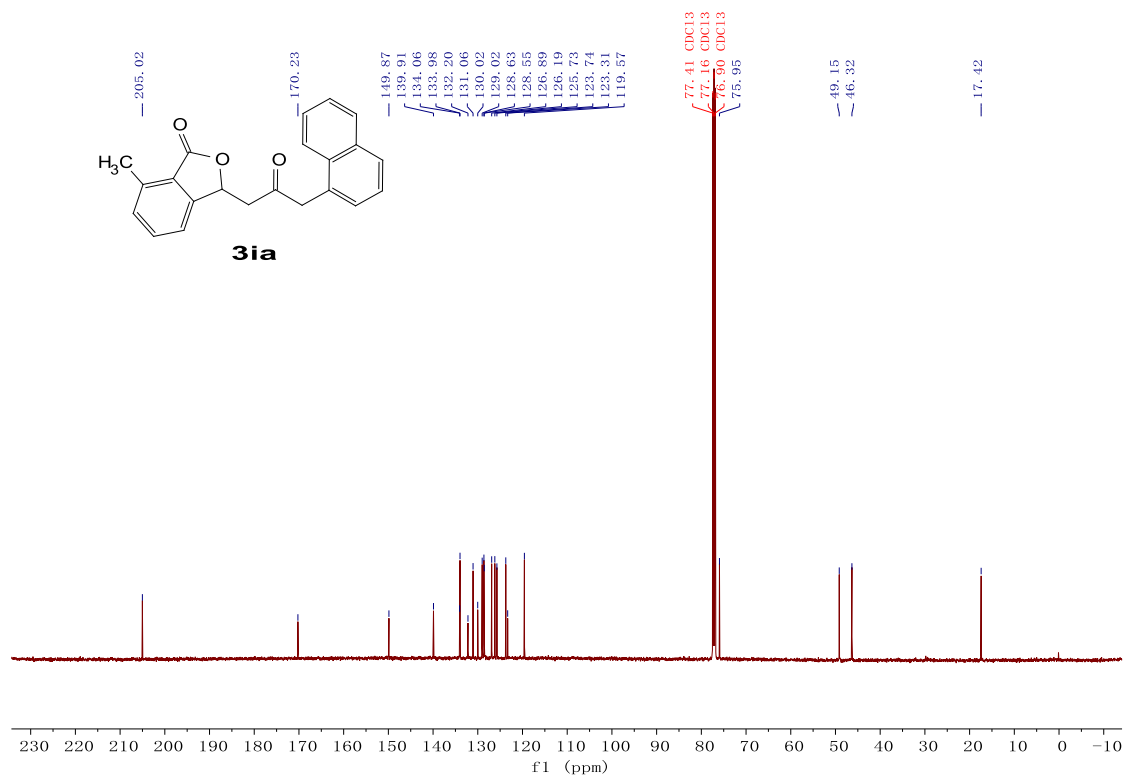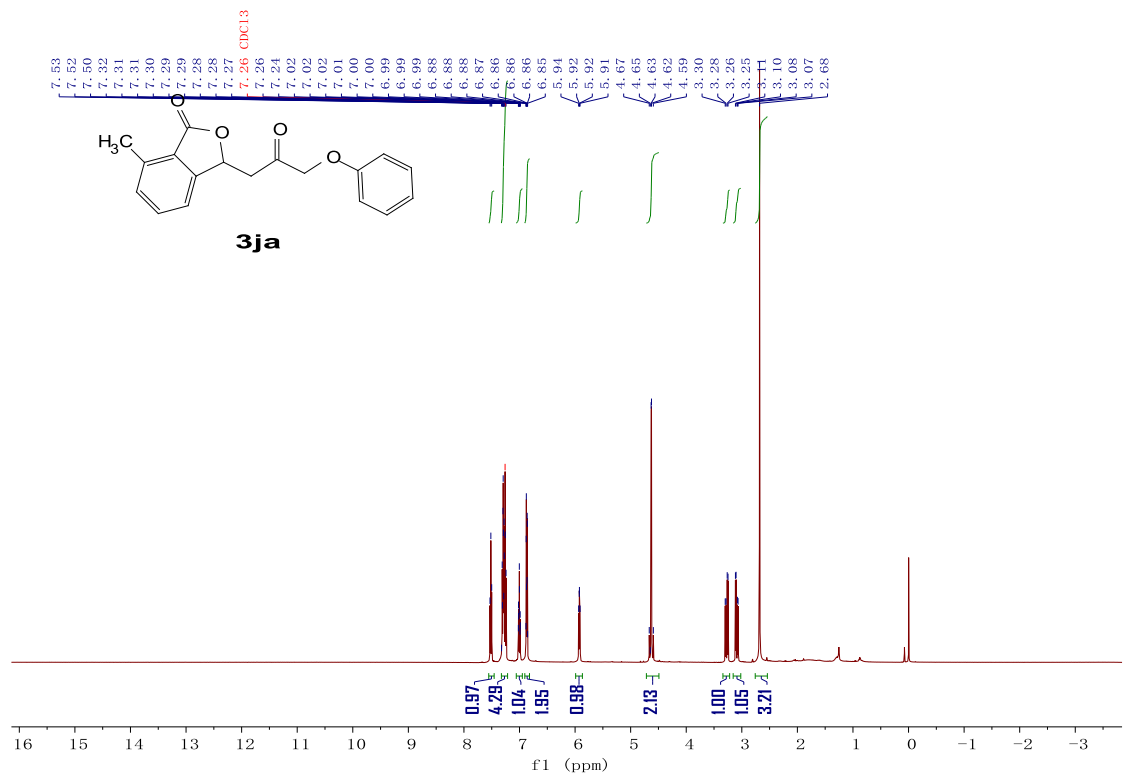

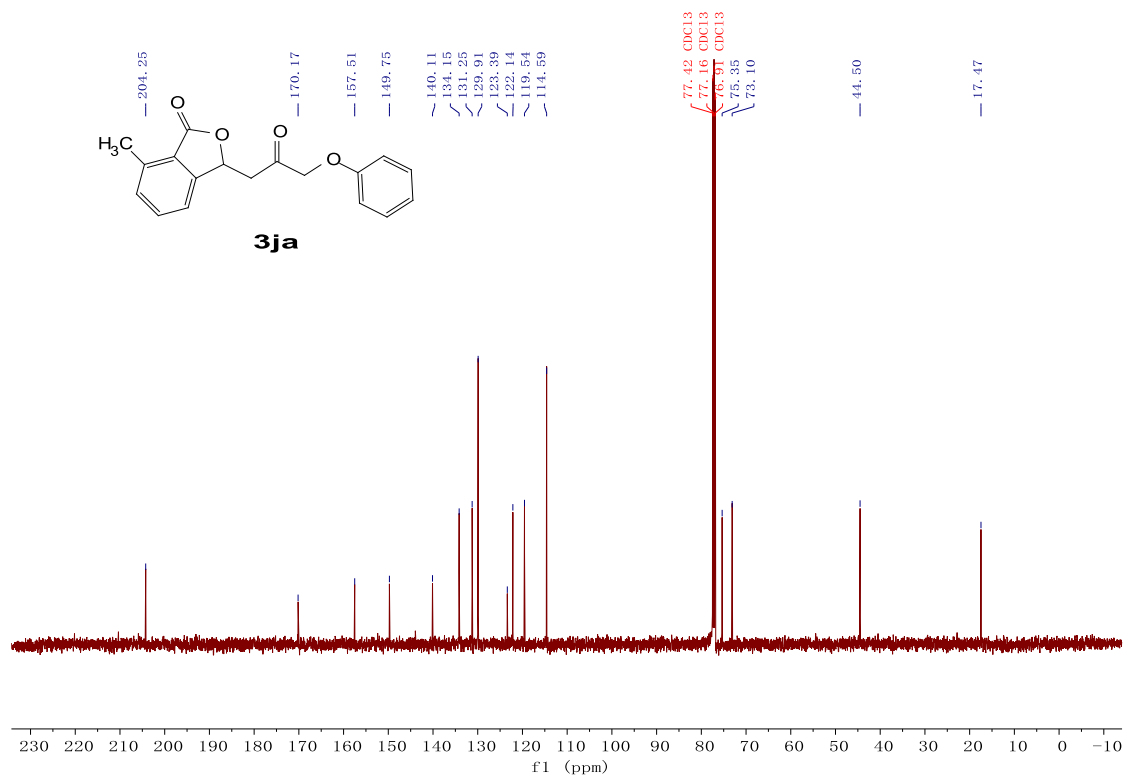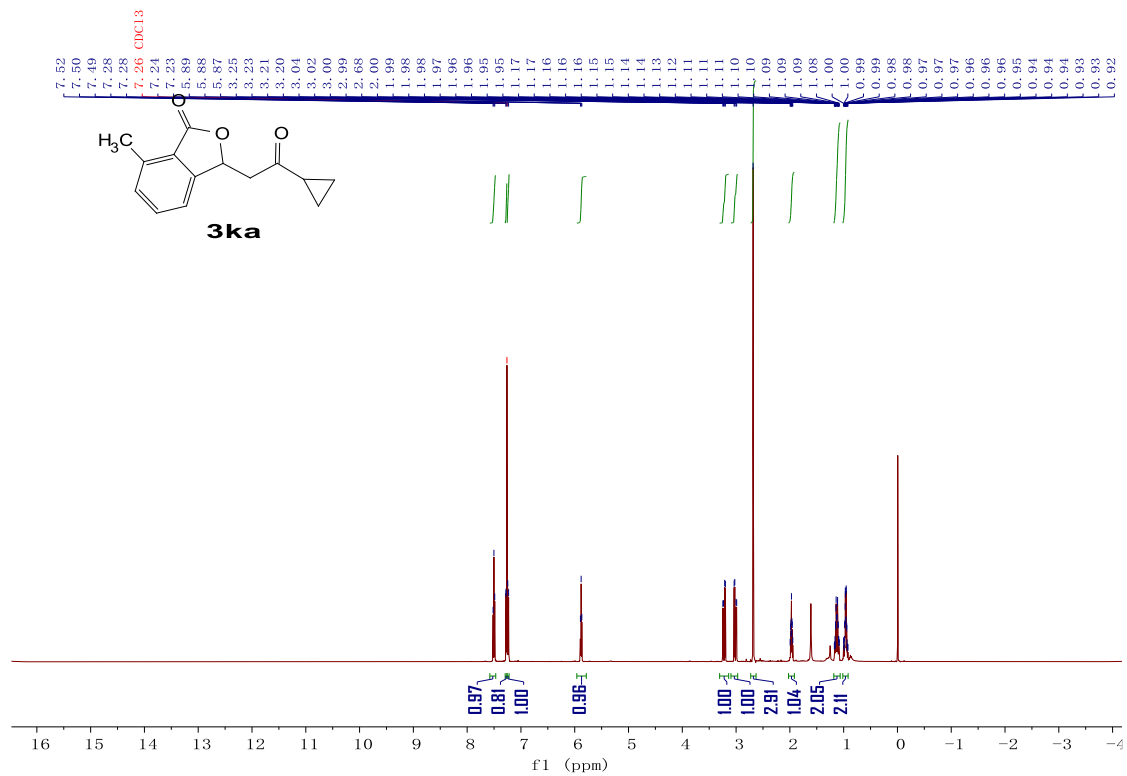



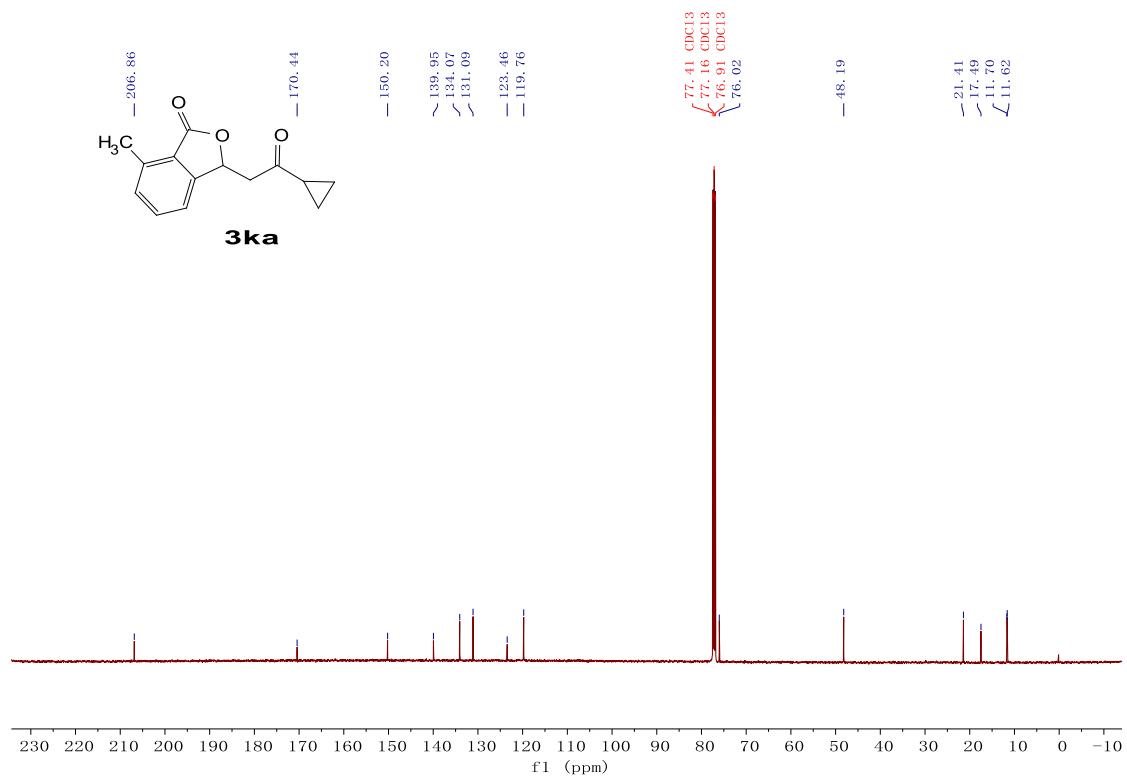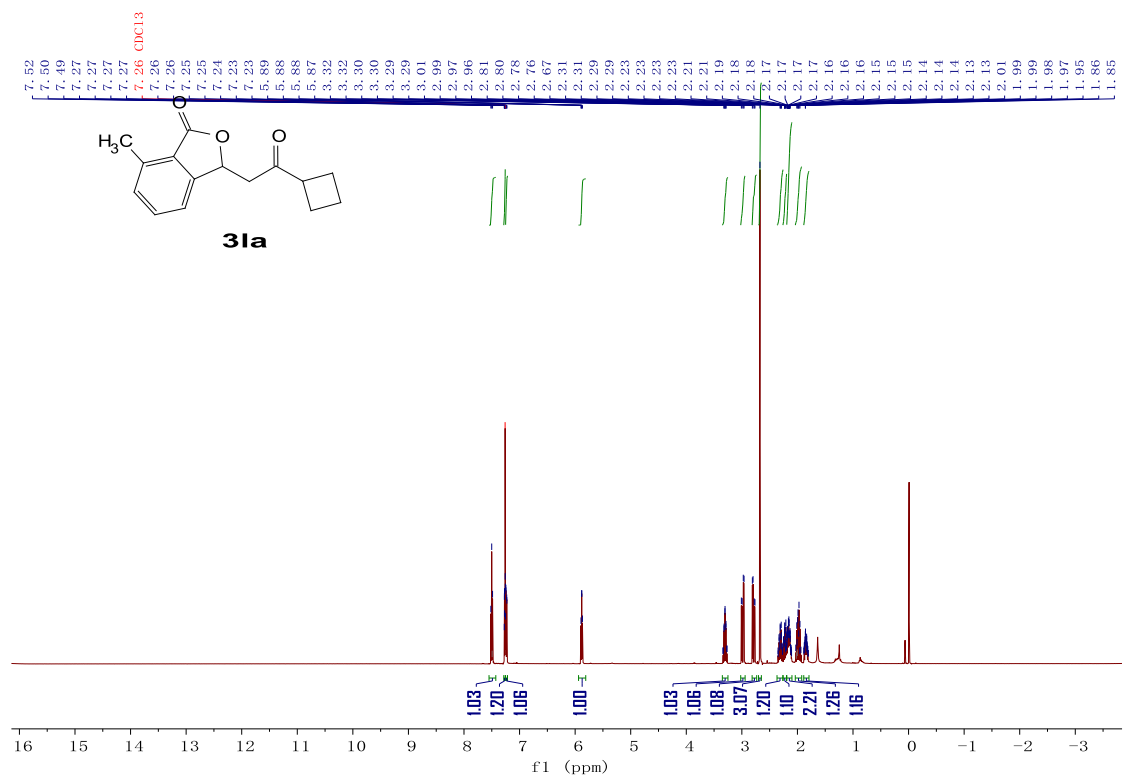

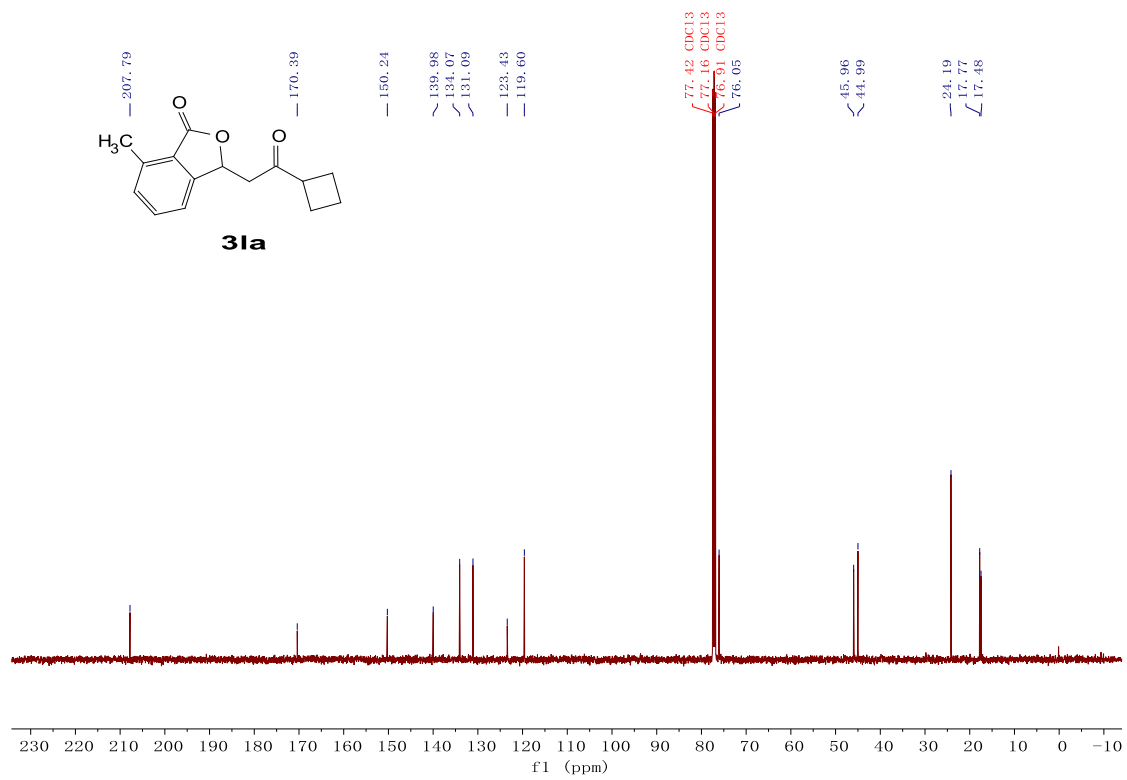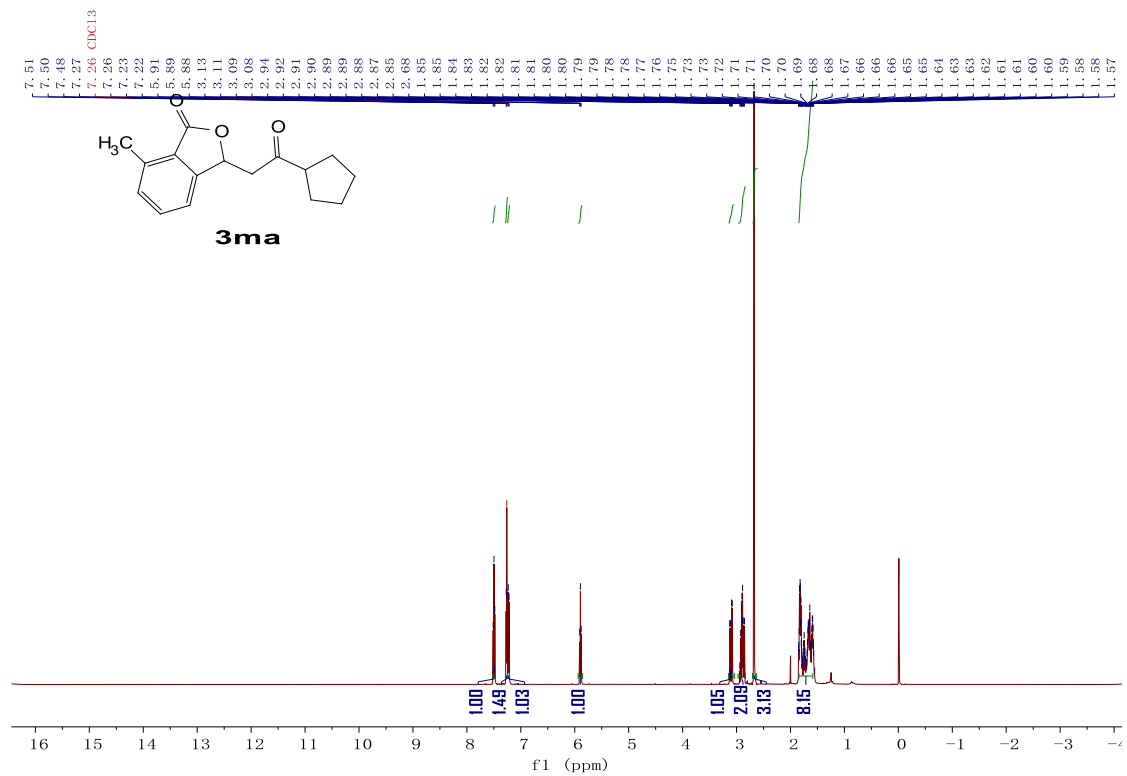

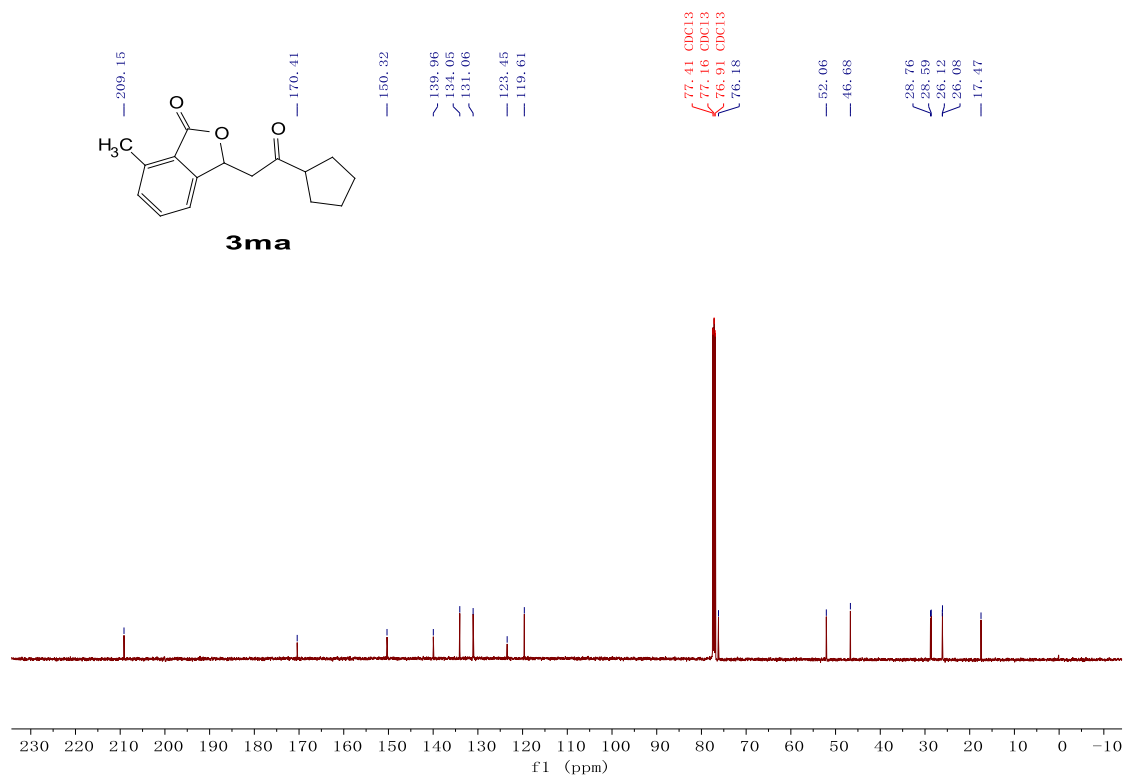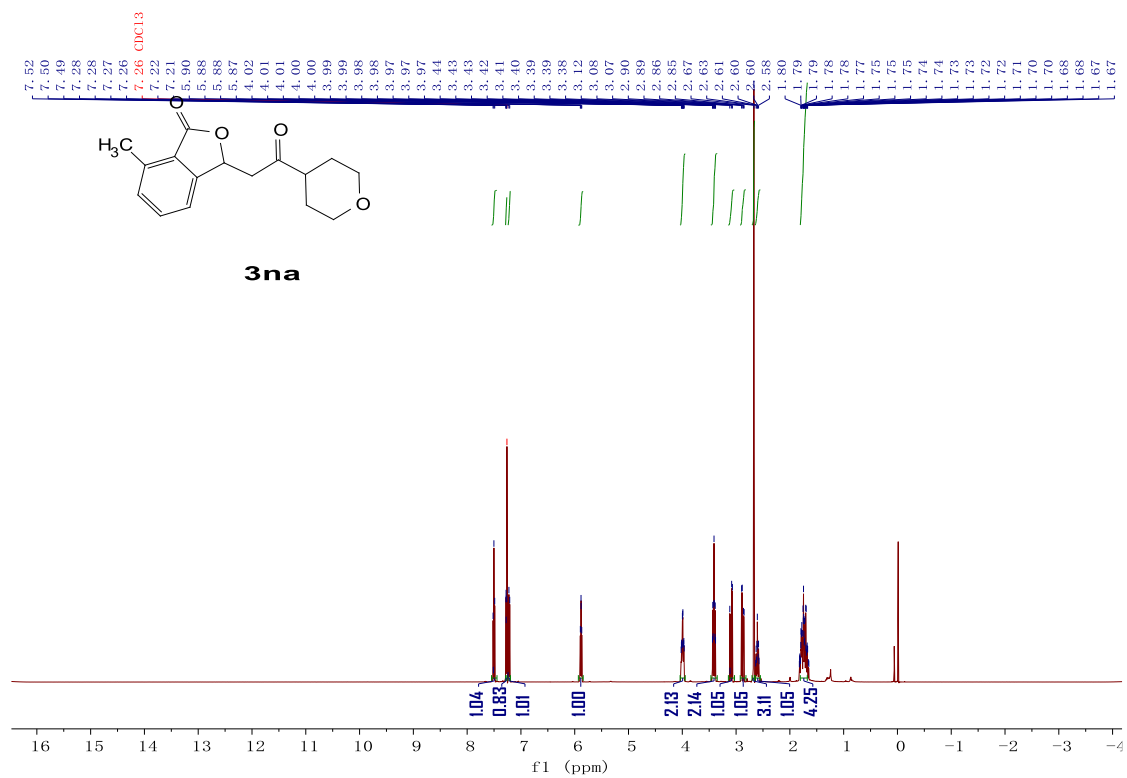

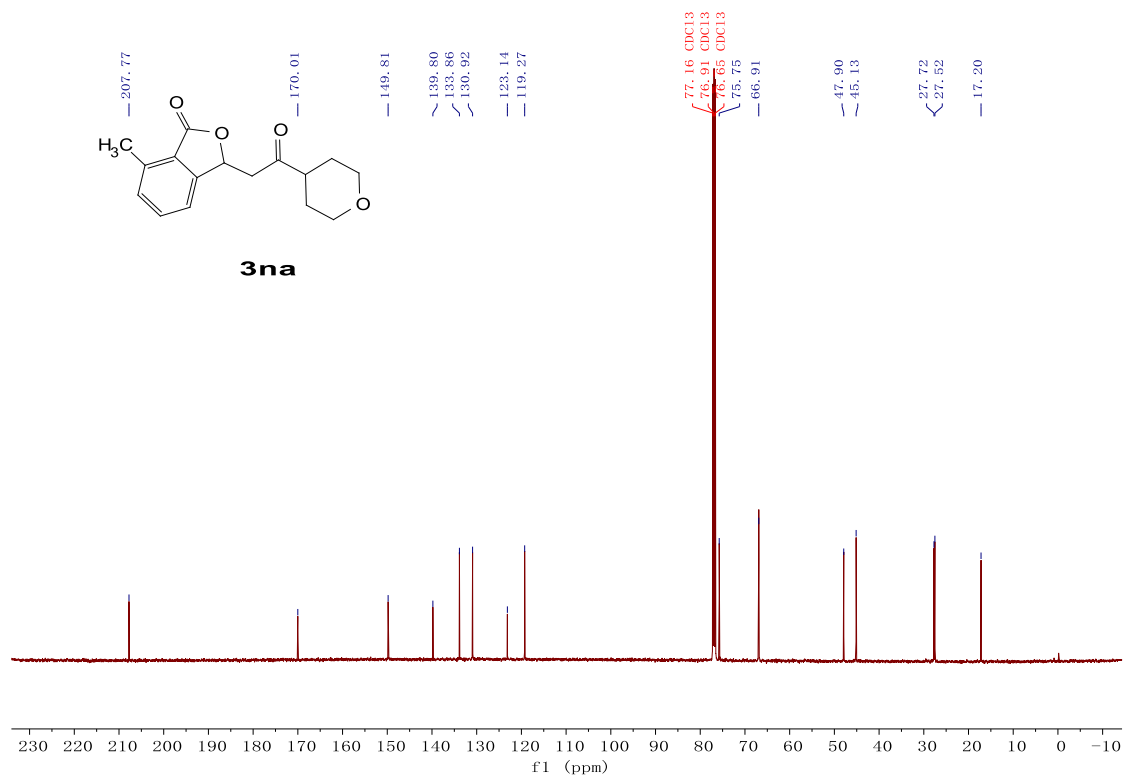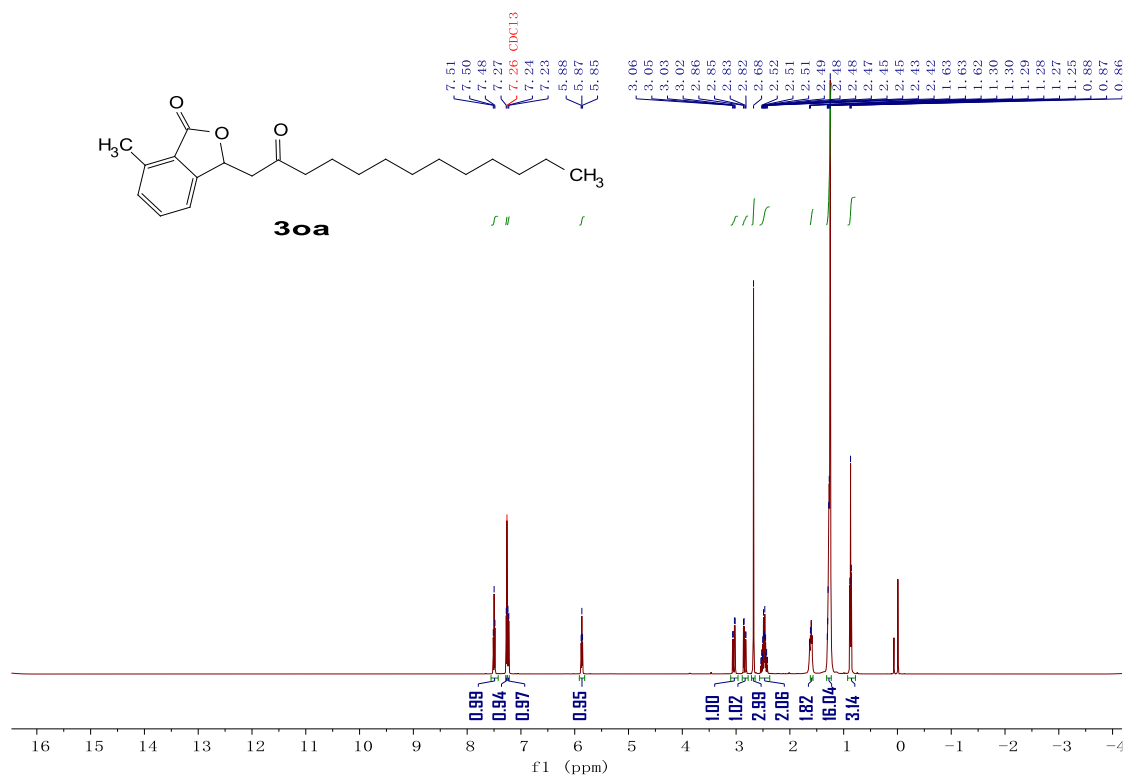

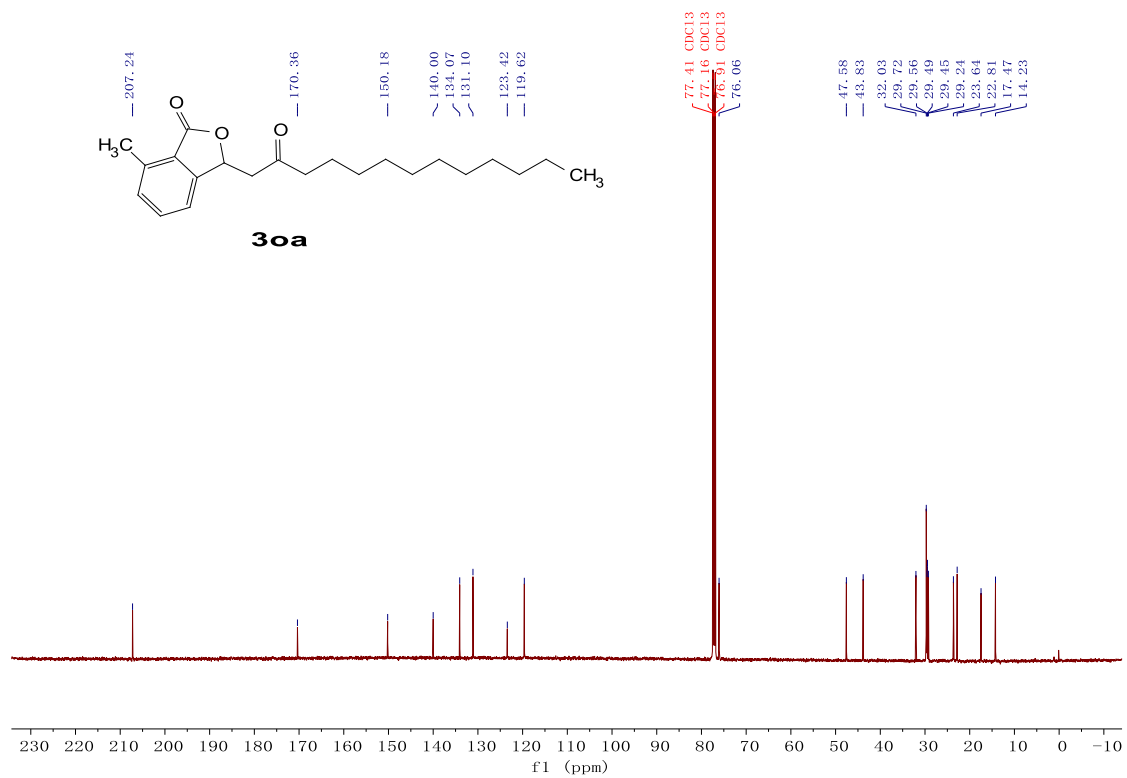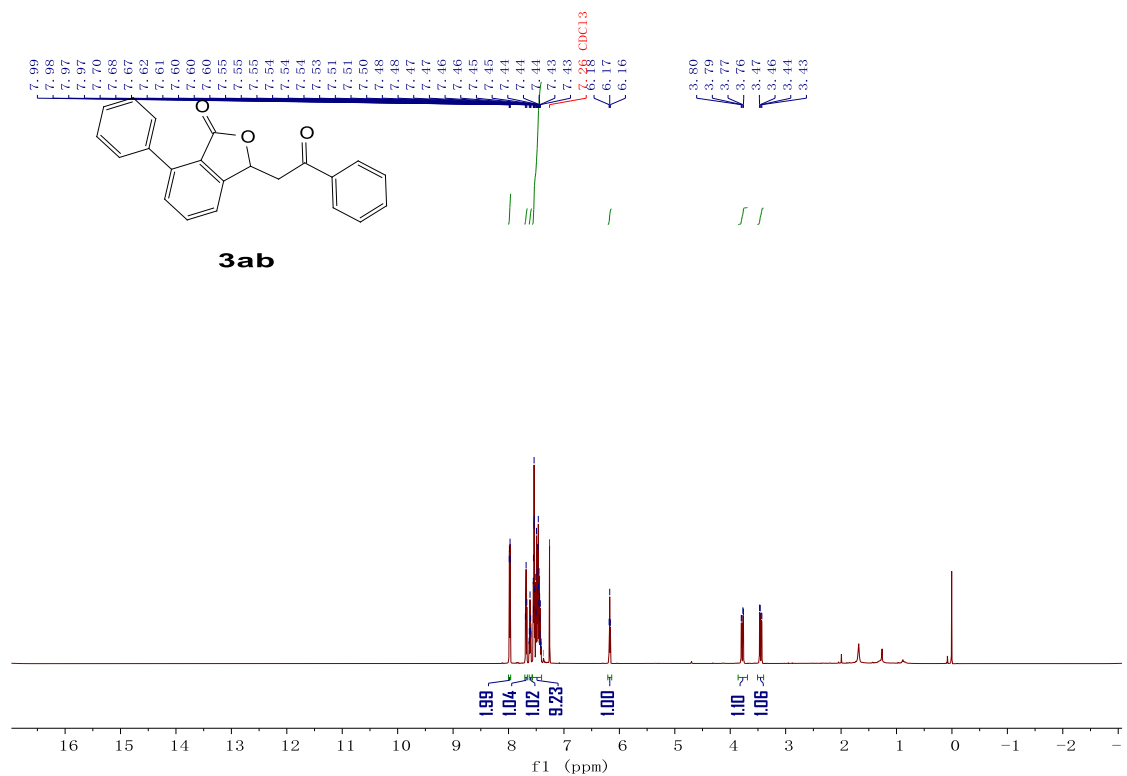

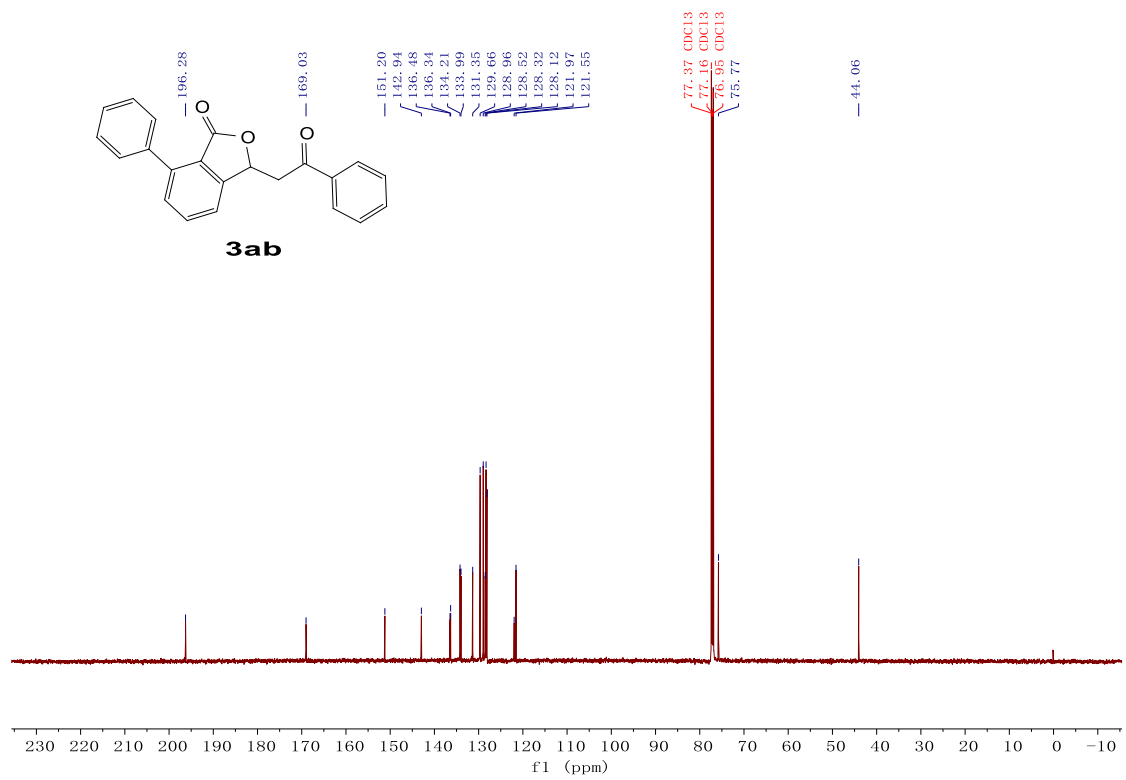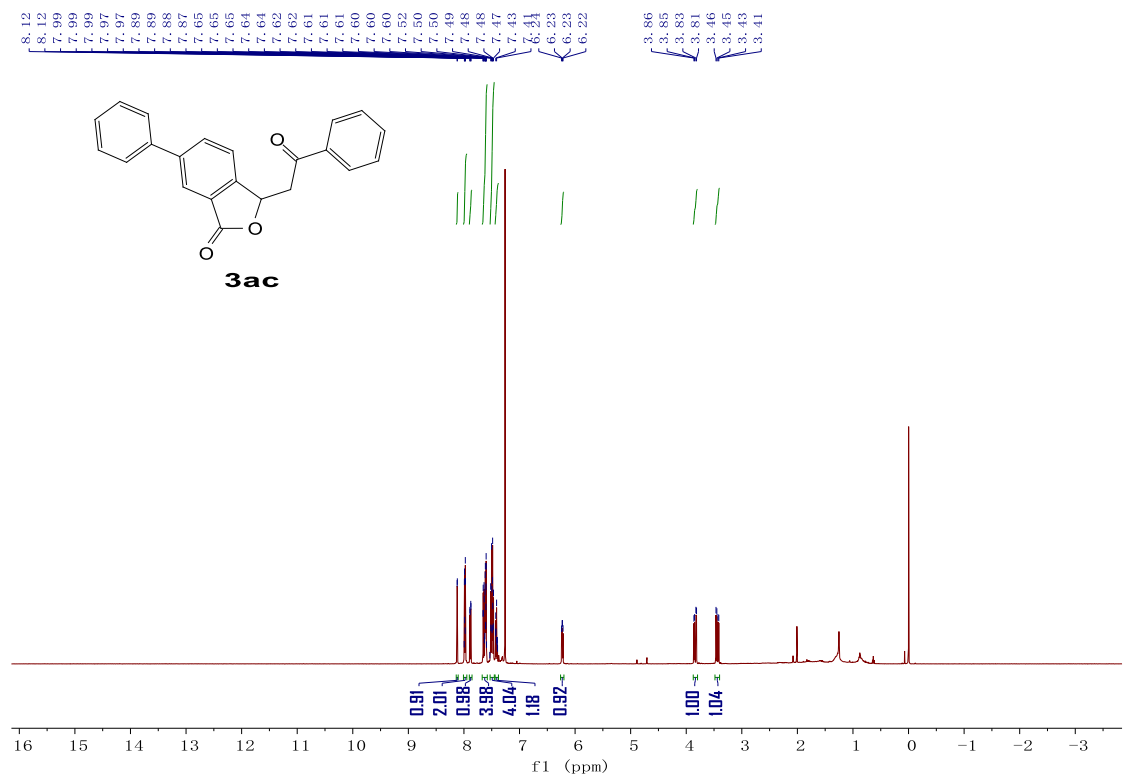

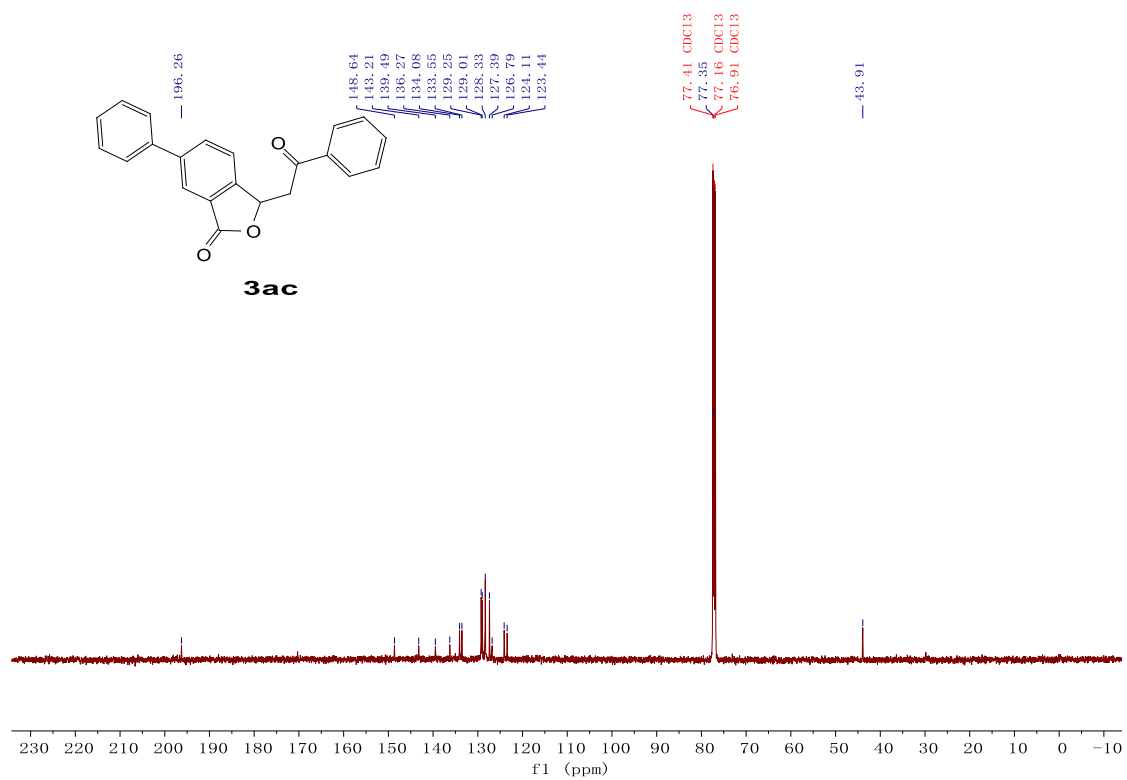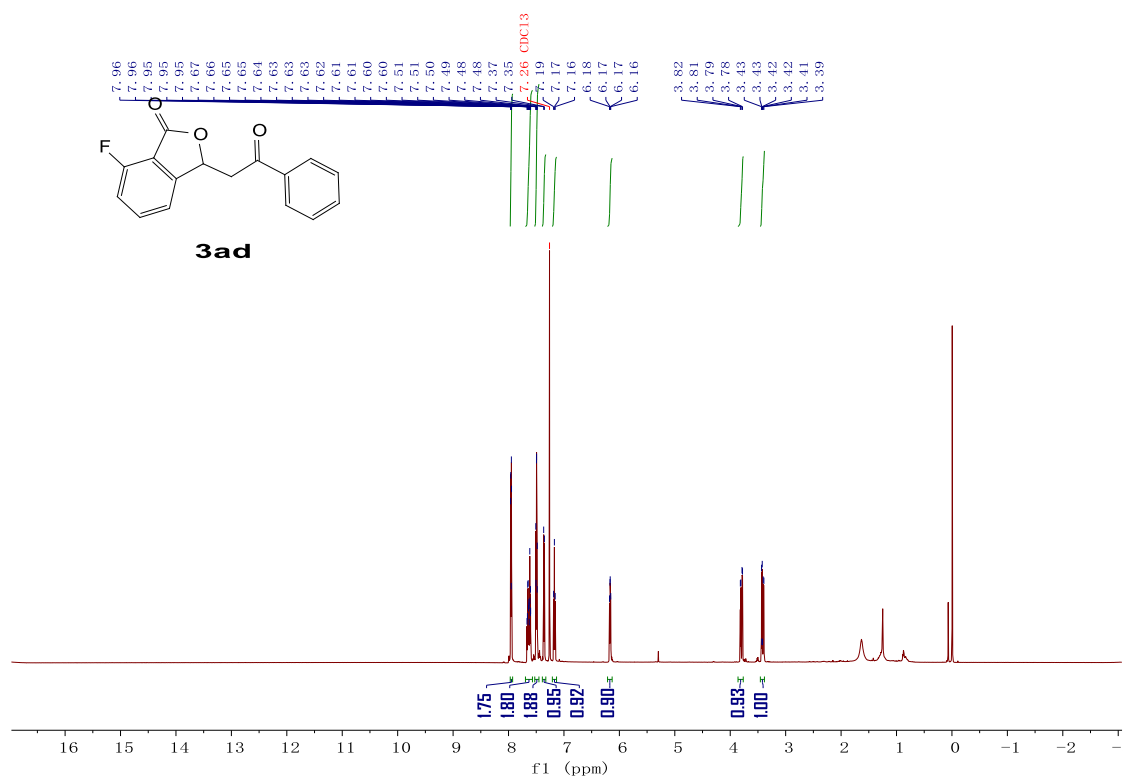

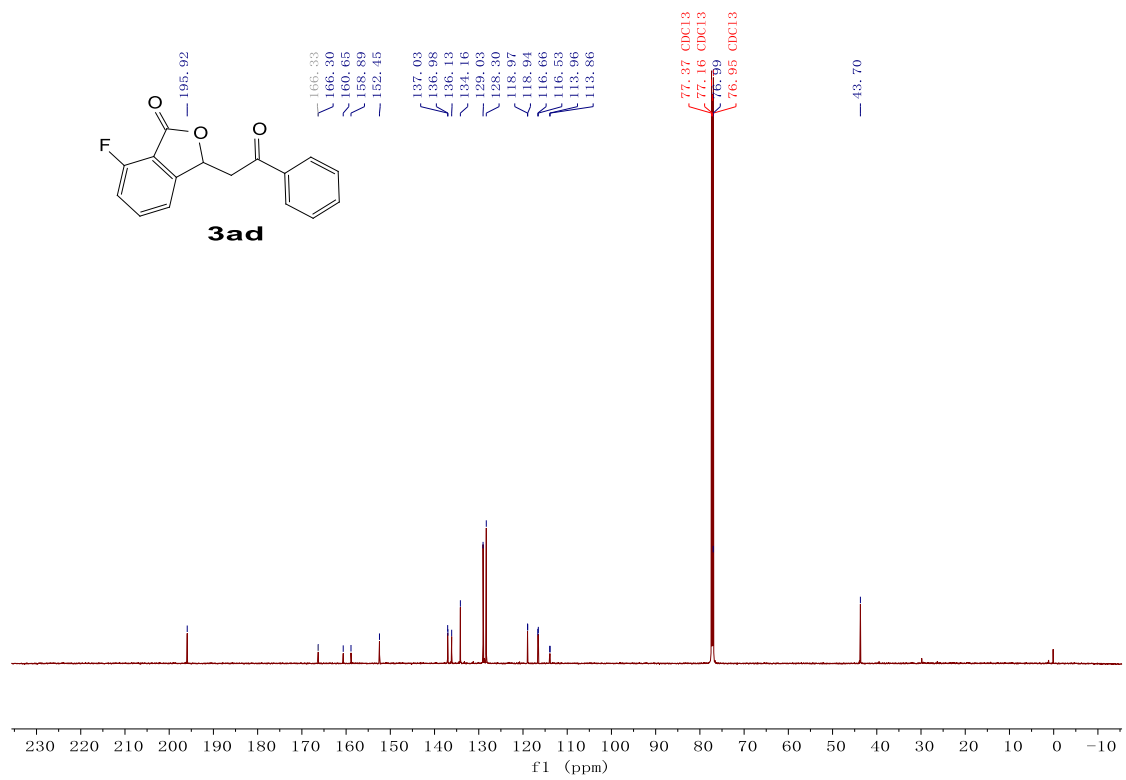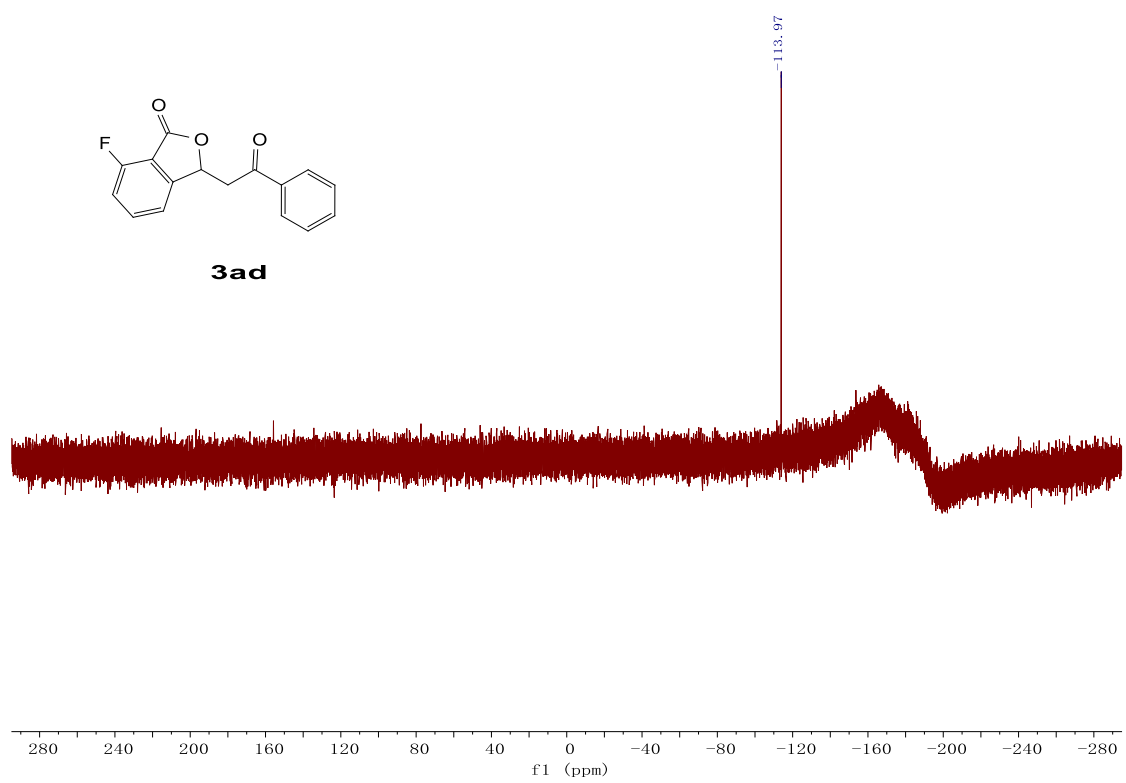



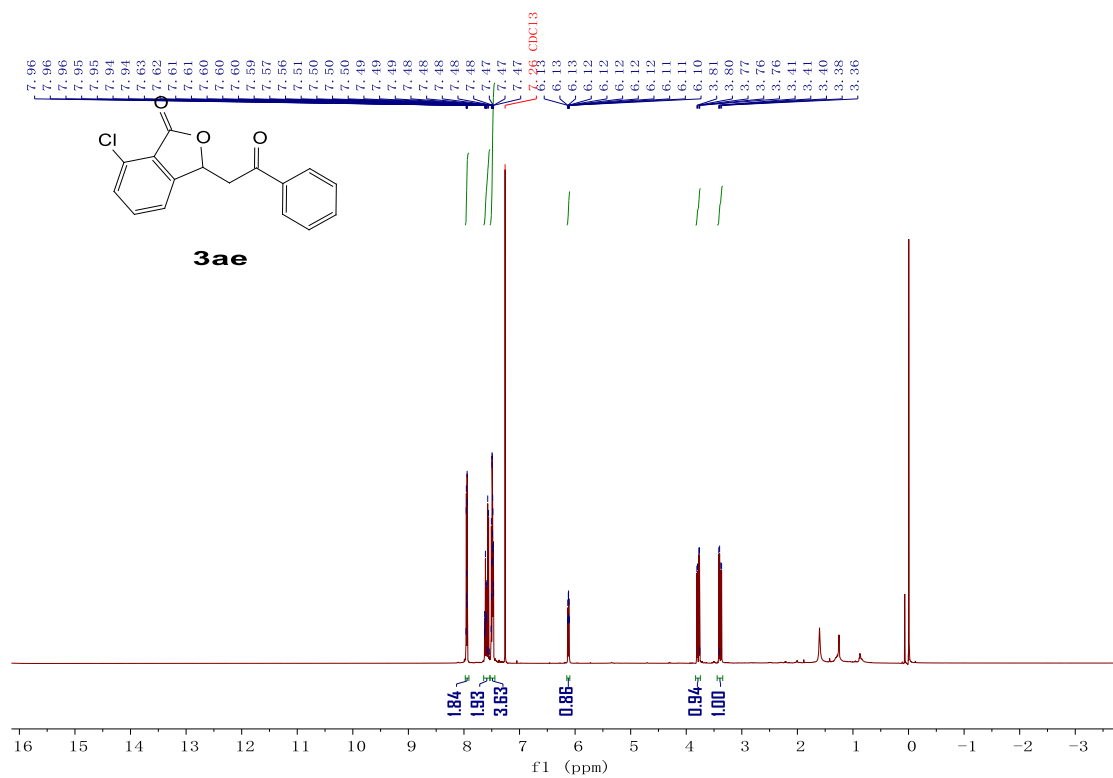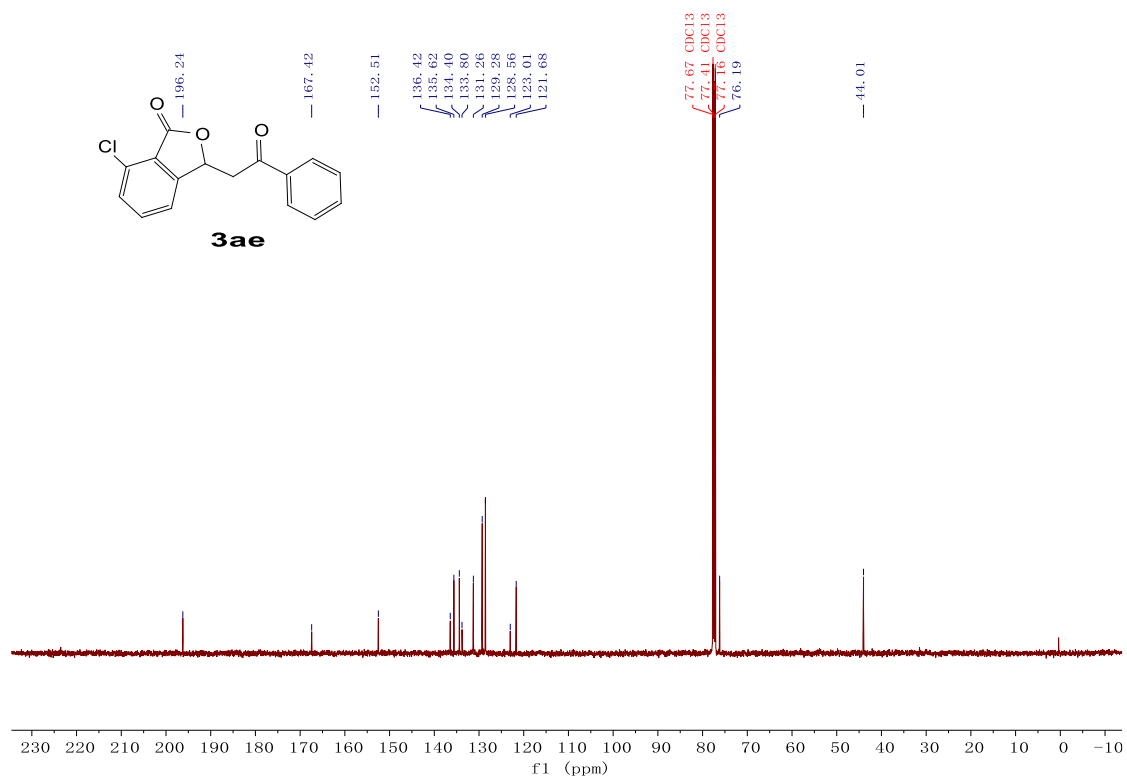

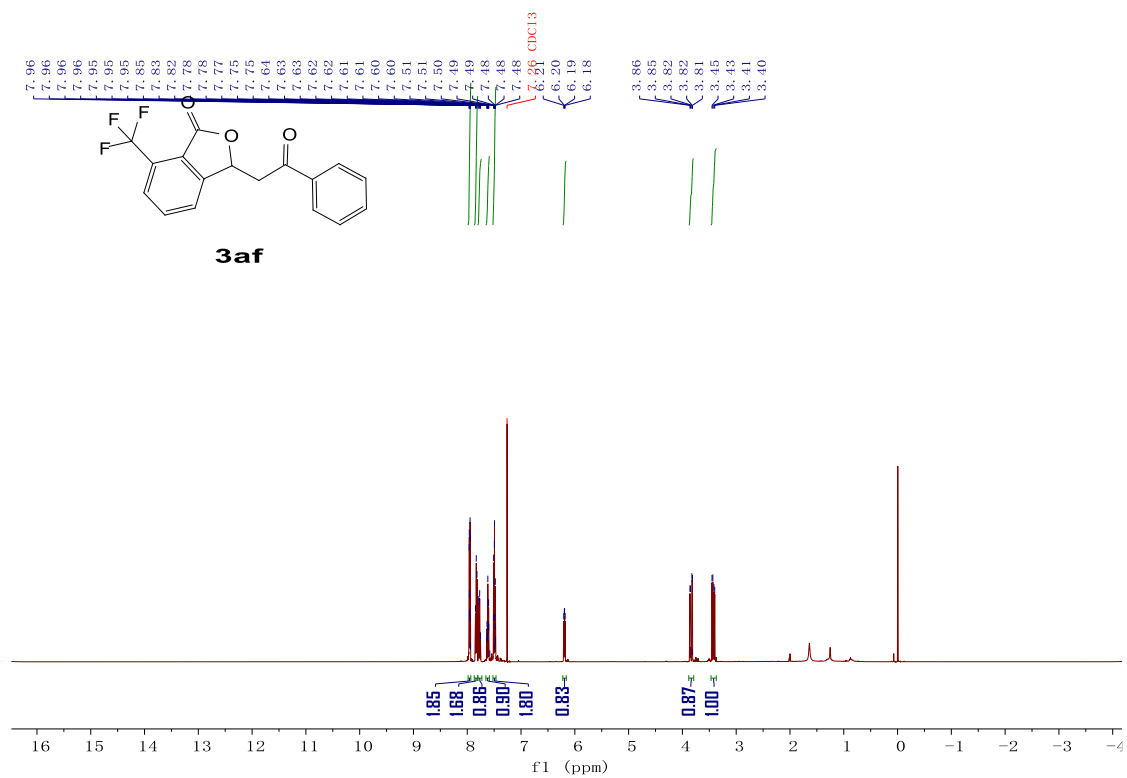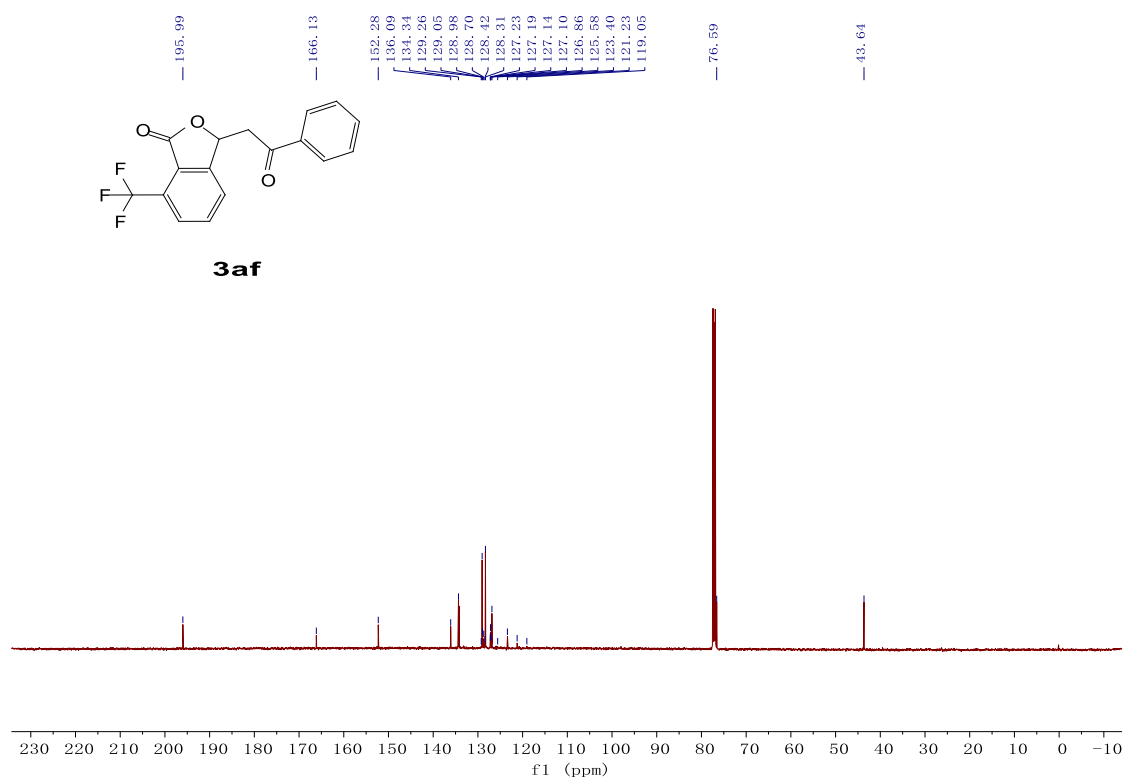

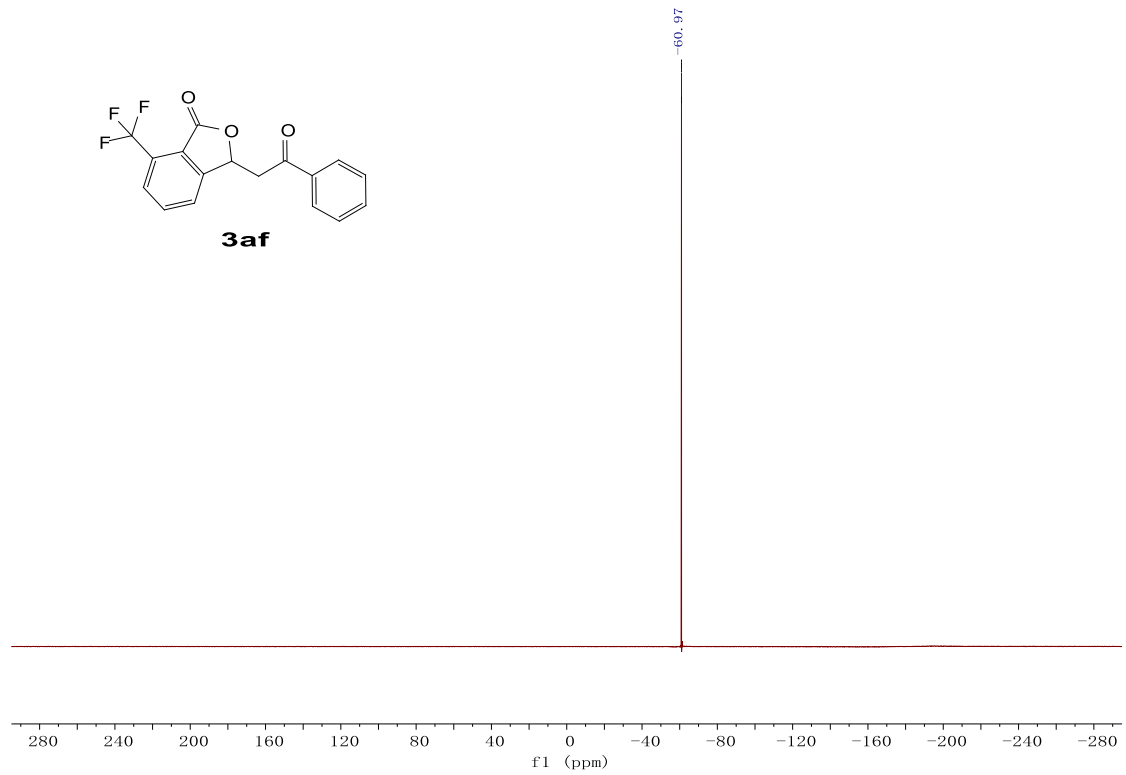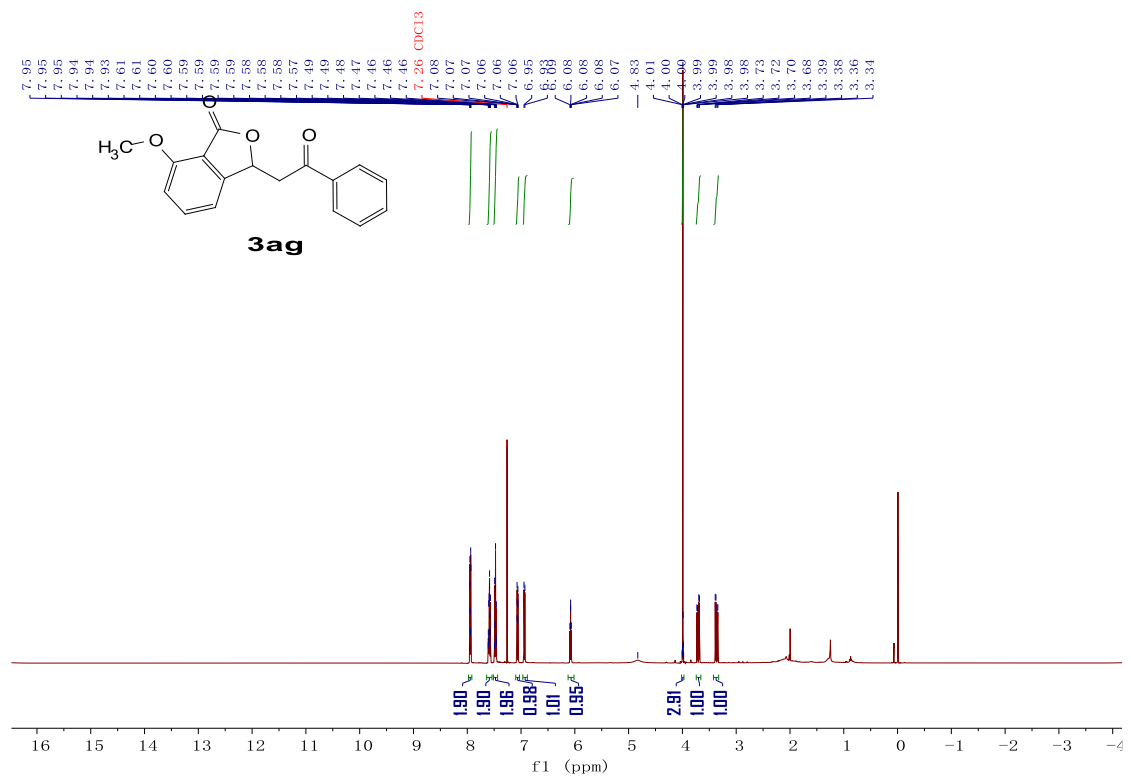

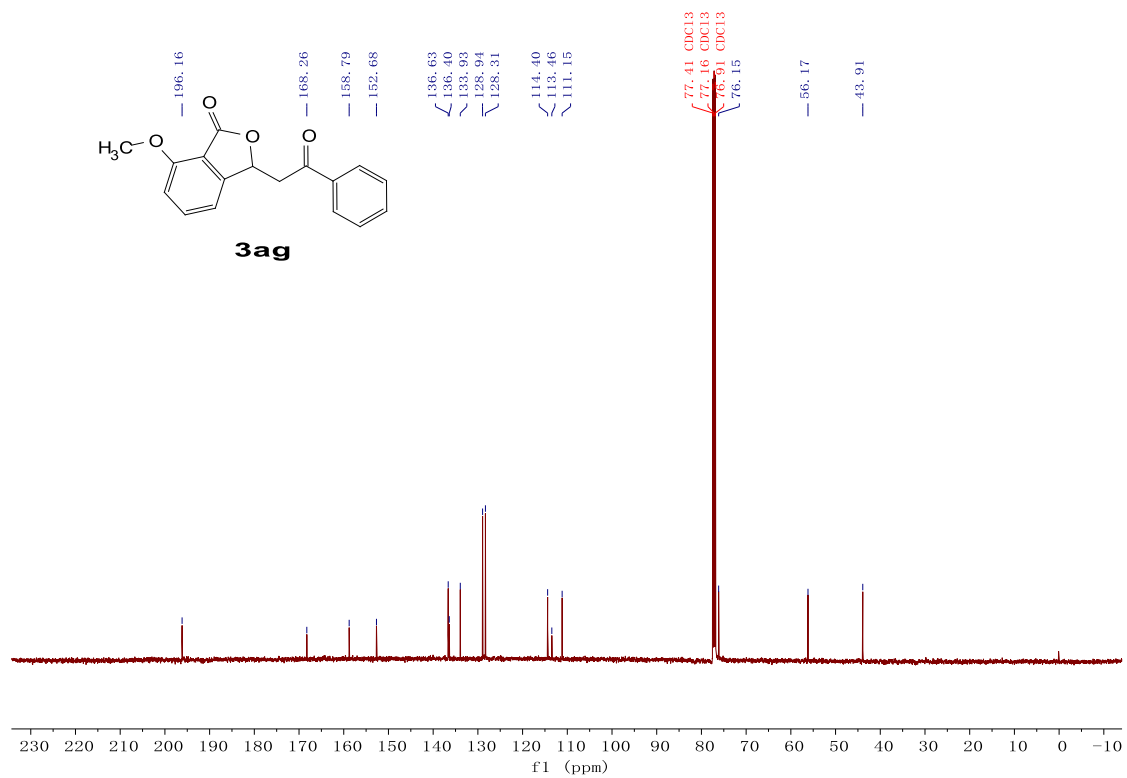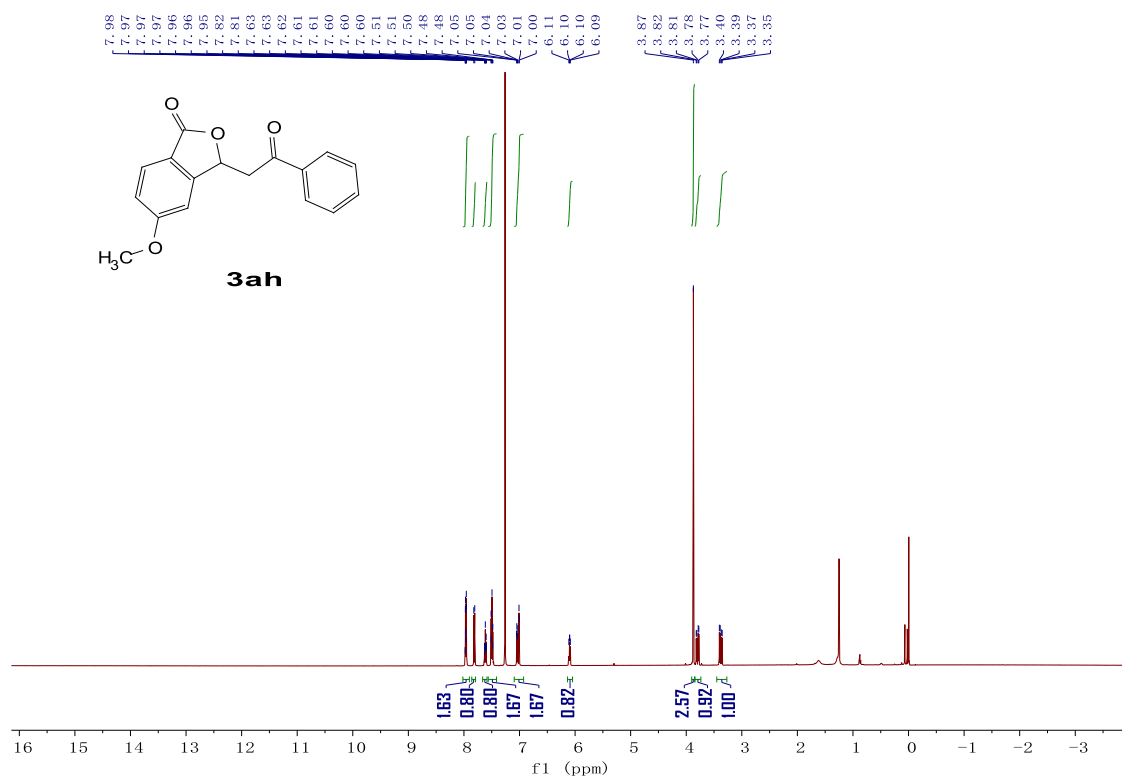



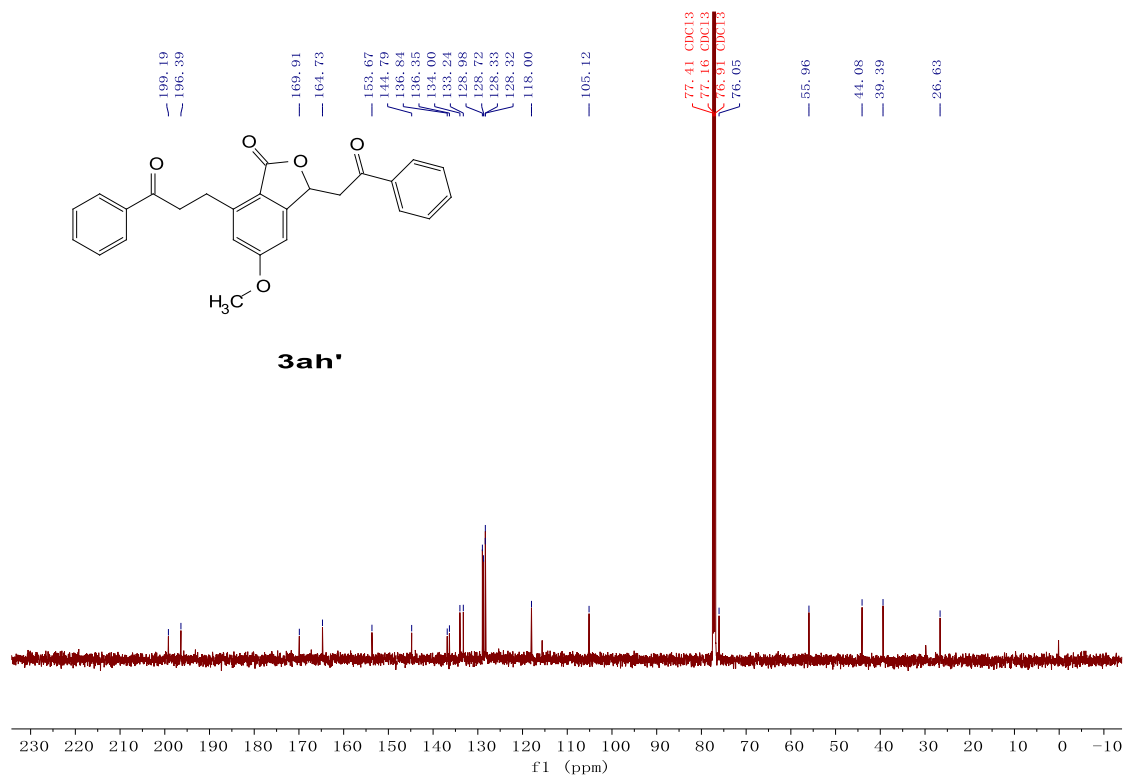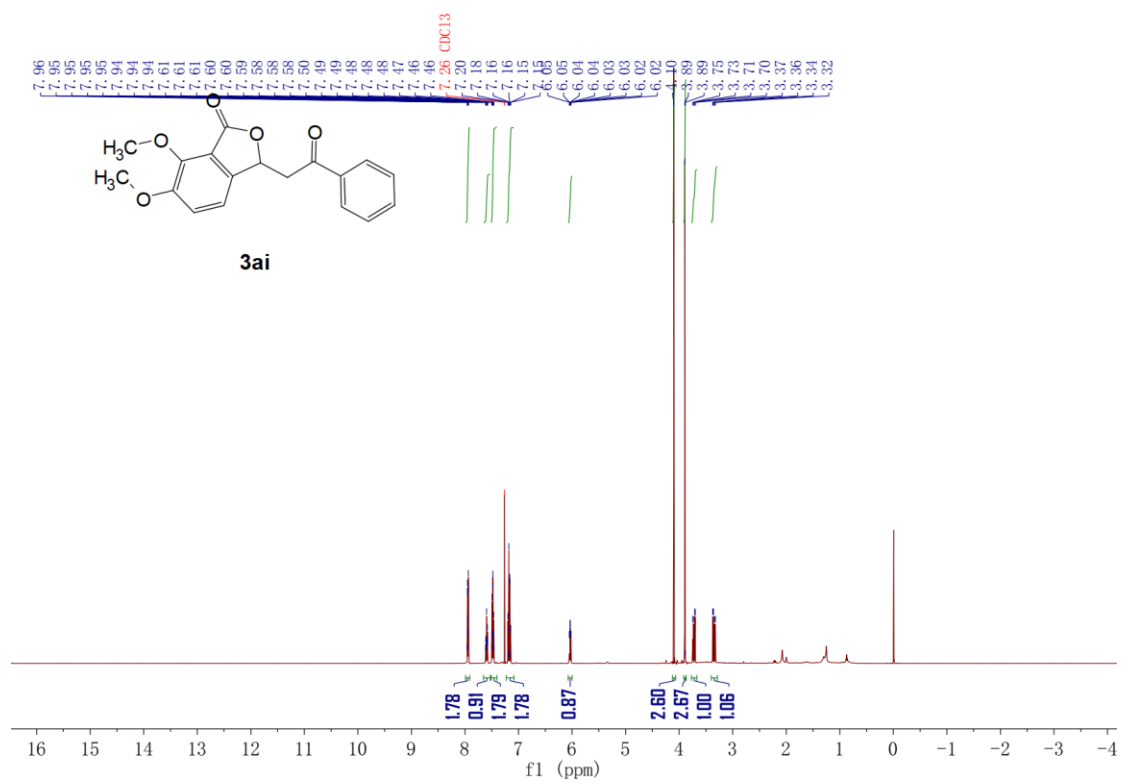

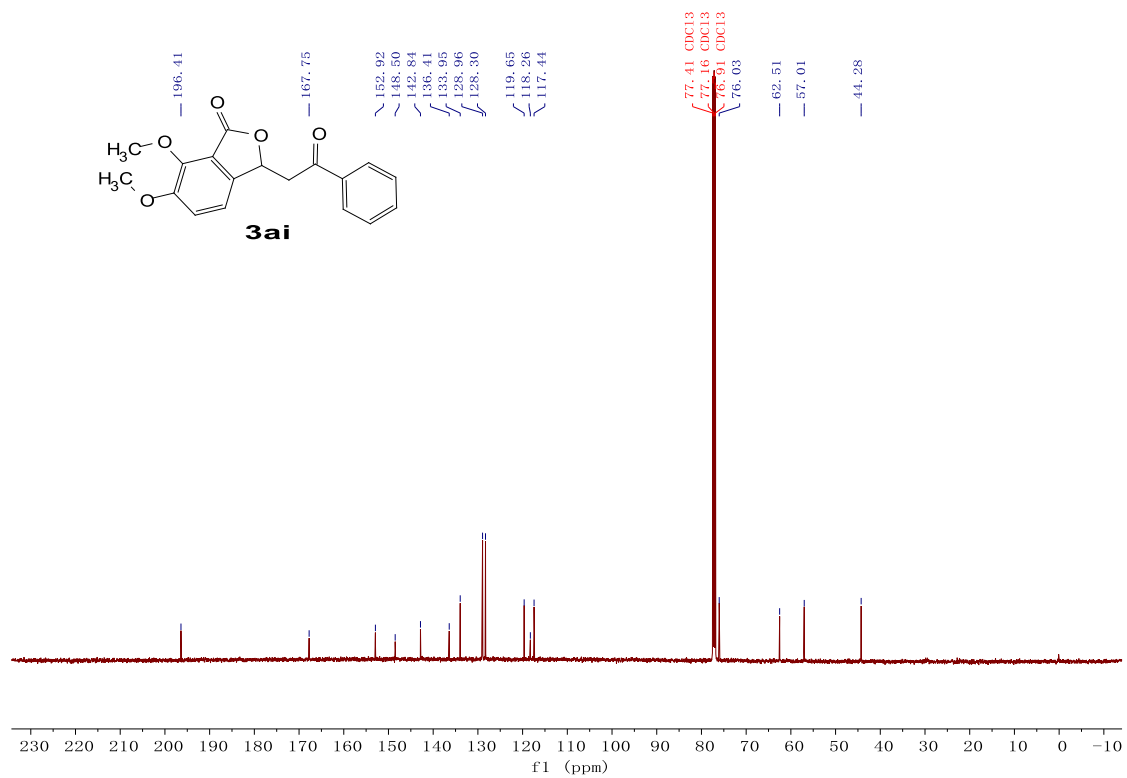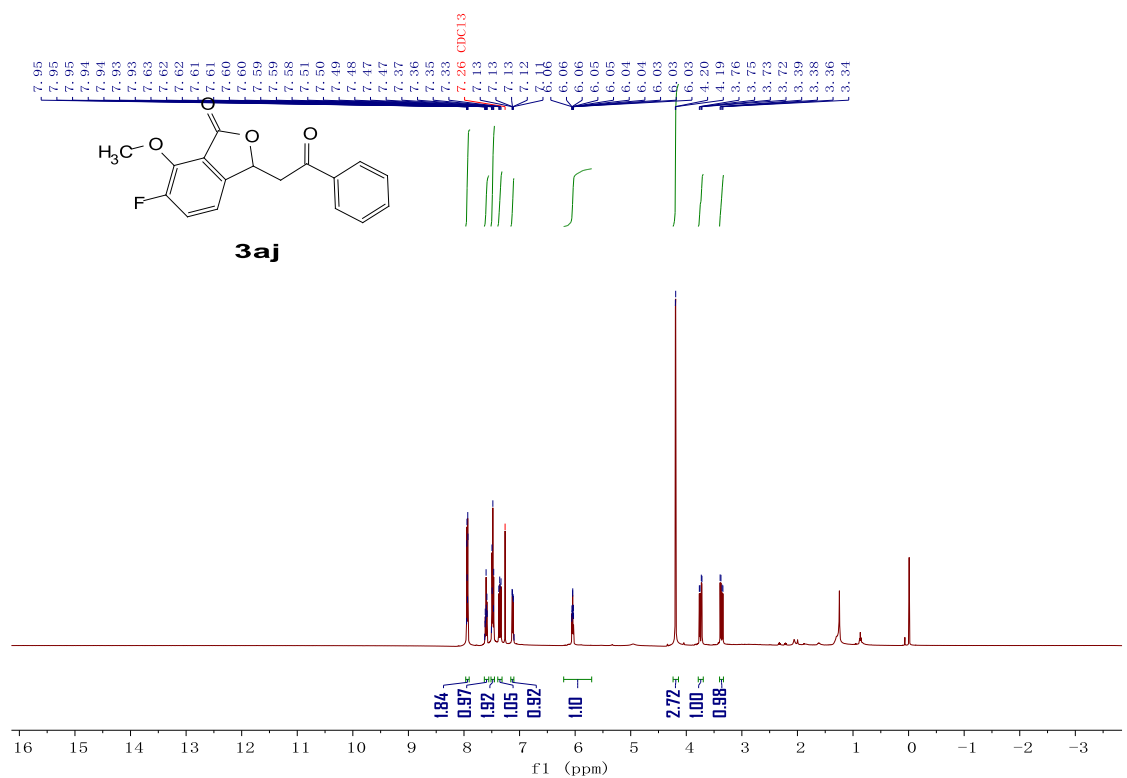

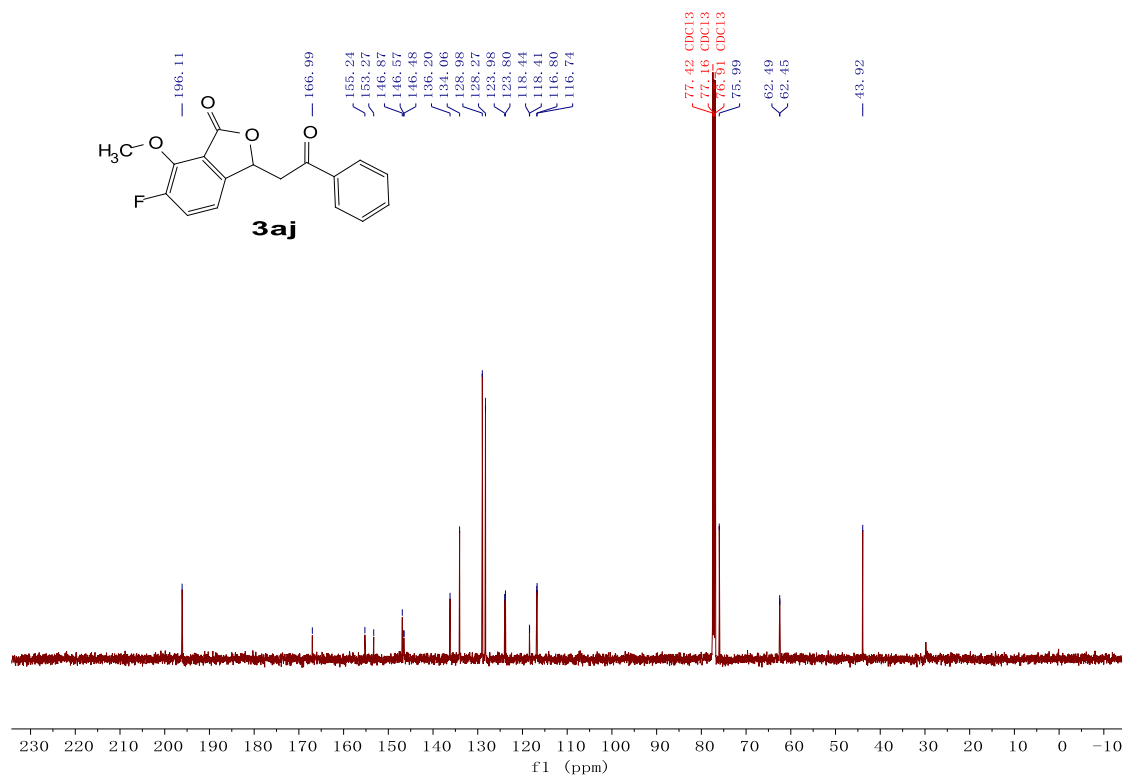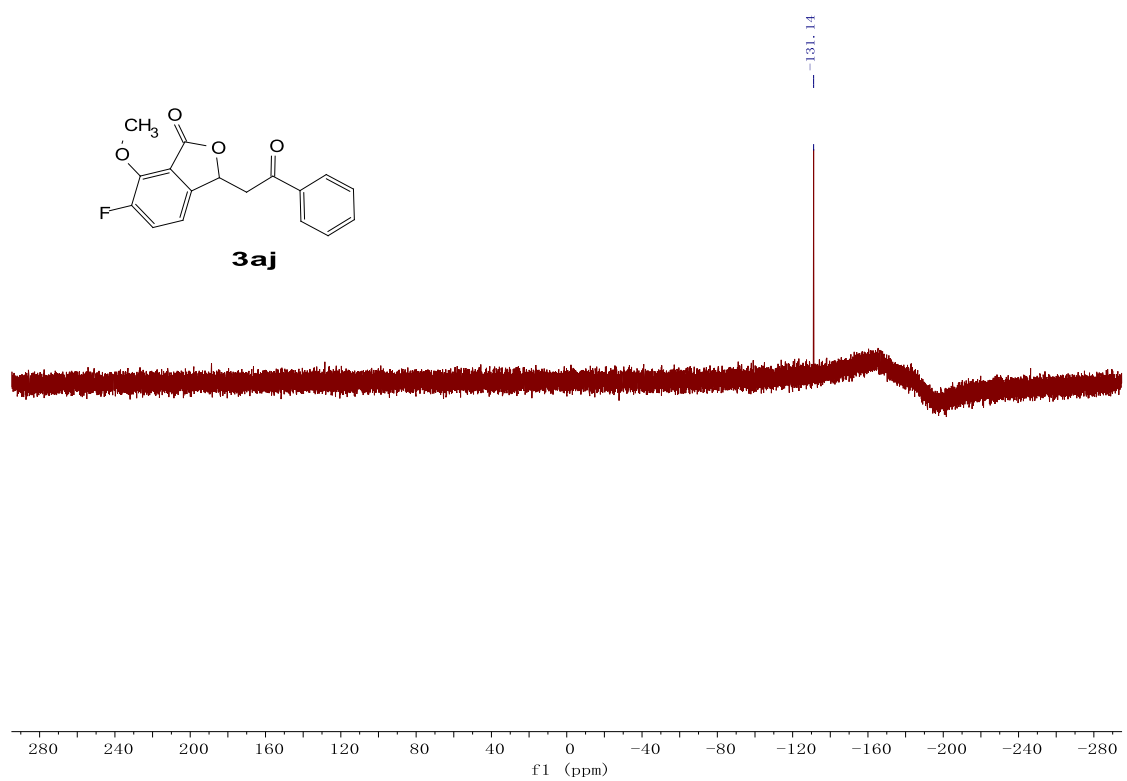



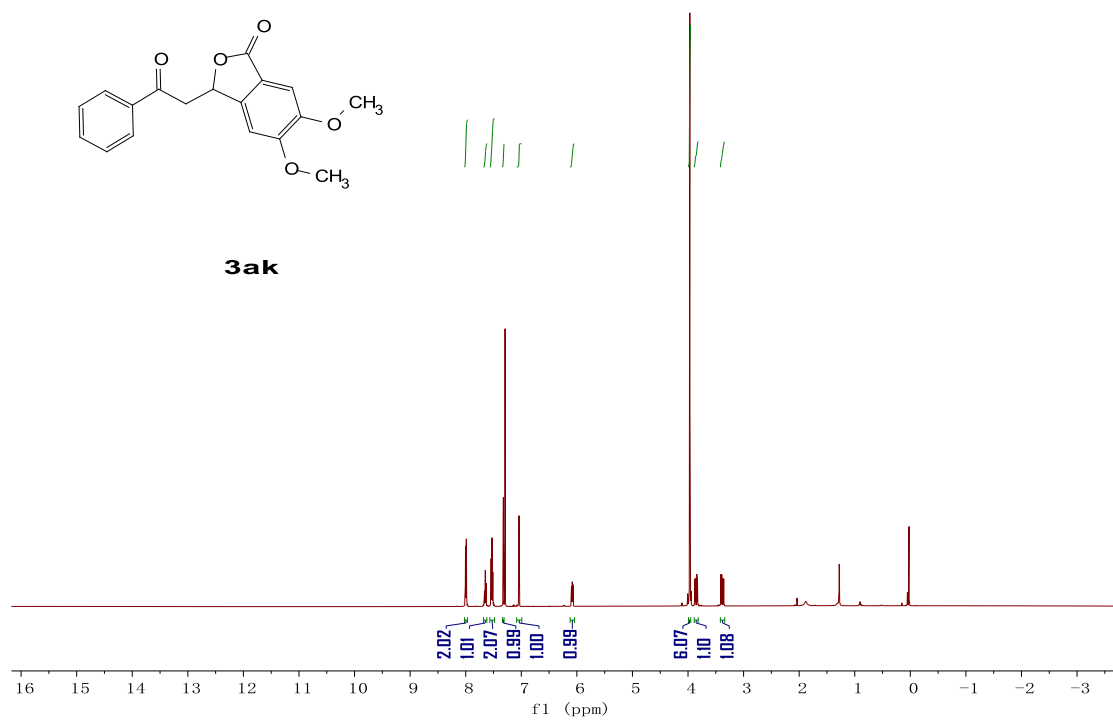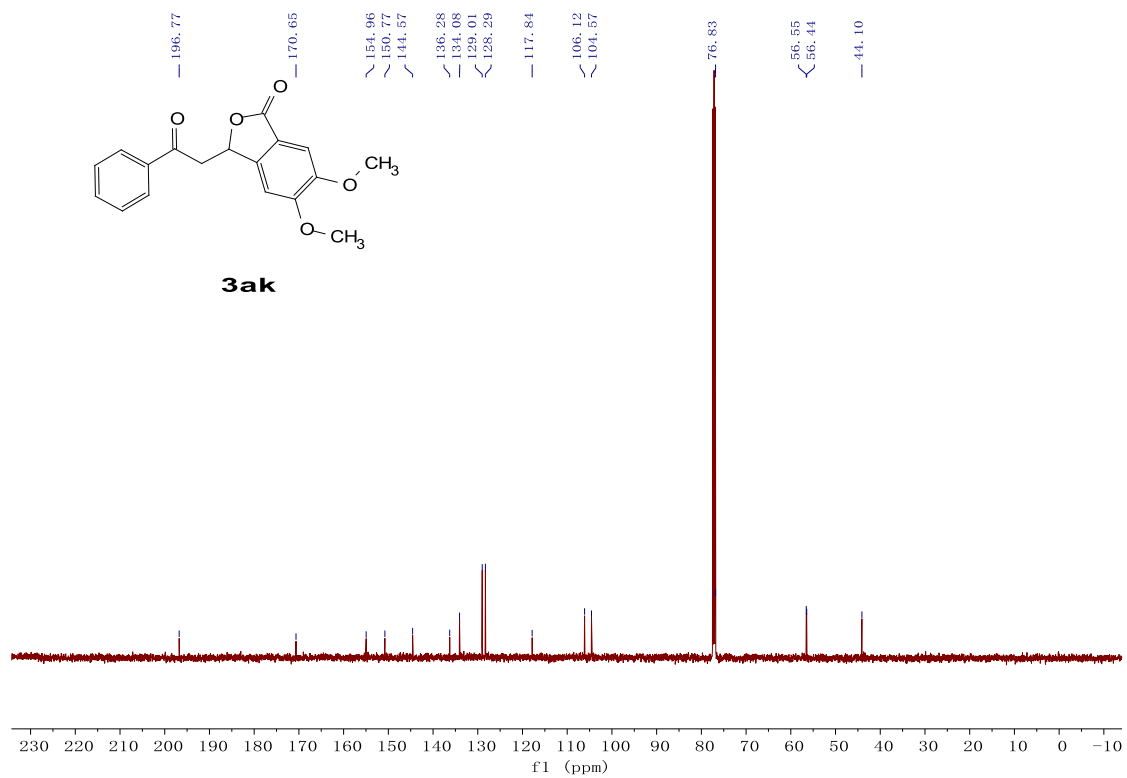

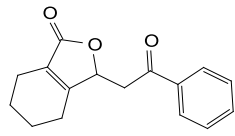

**3al**

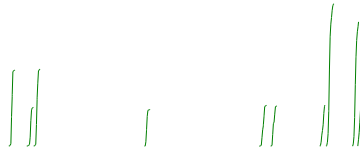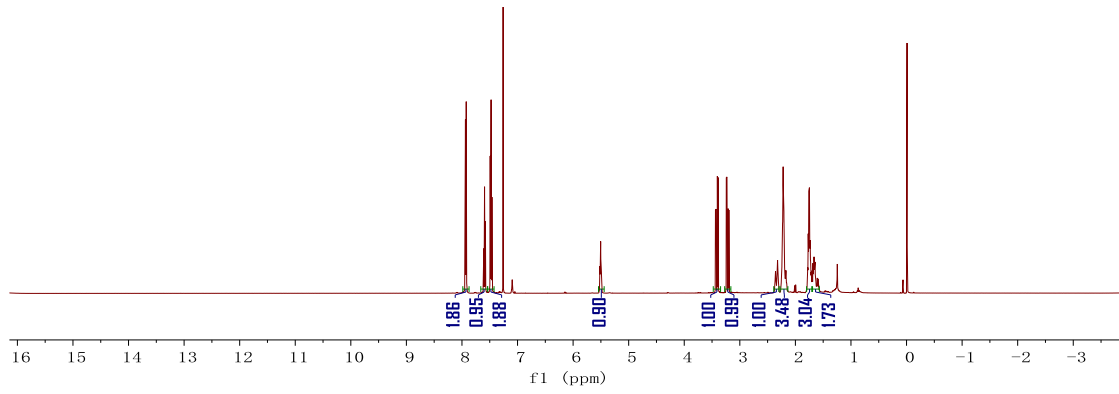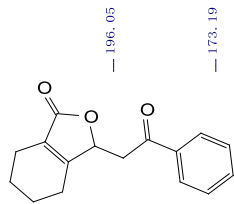

**3al**

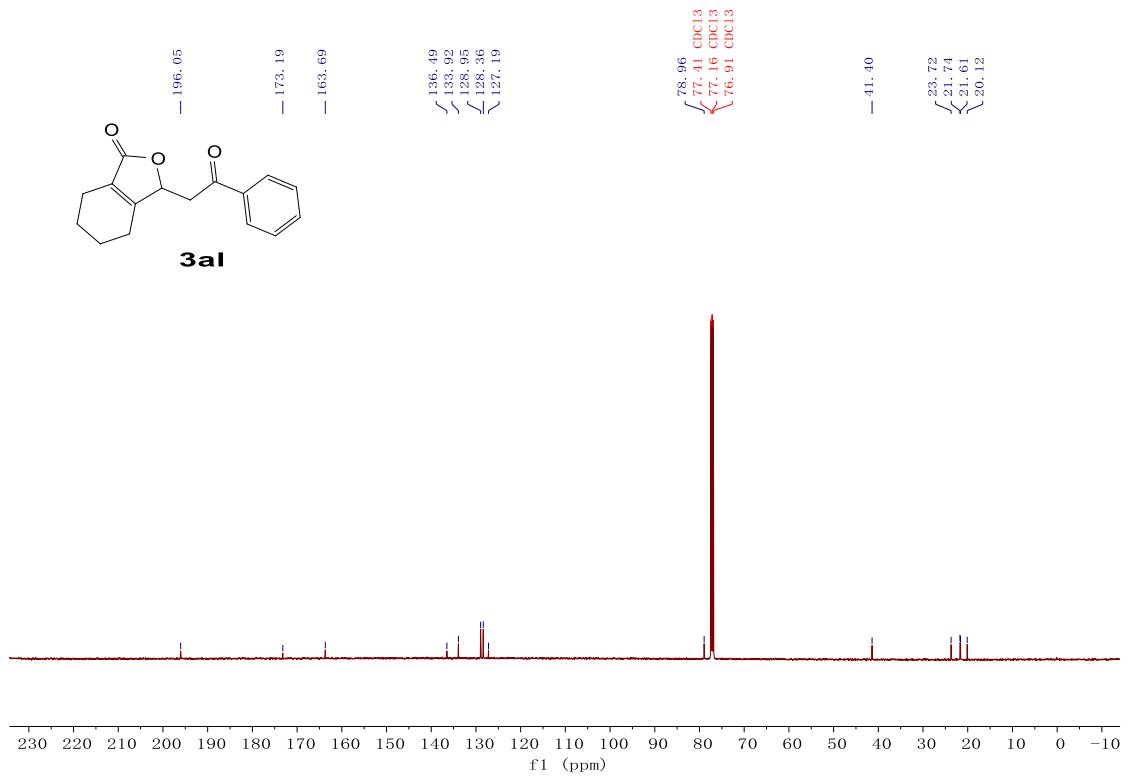

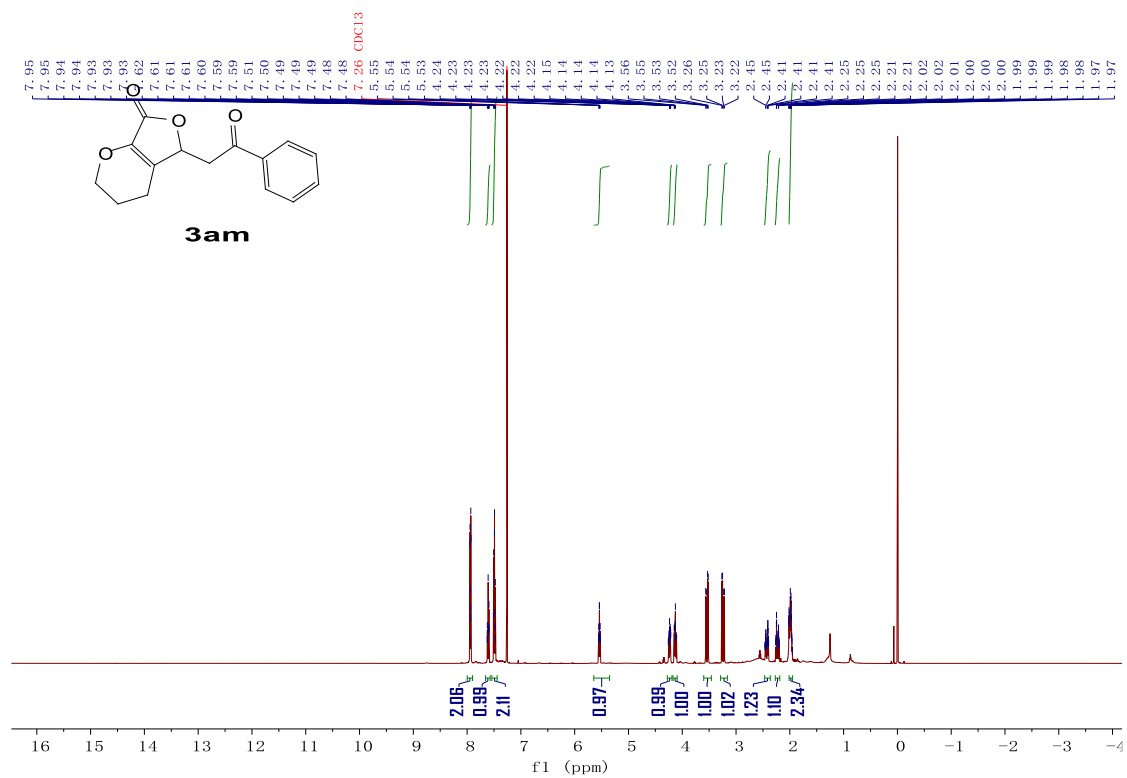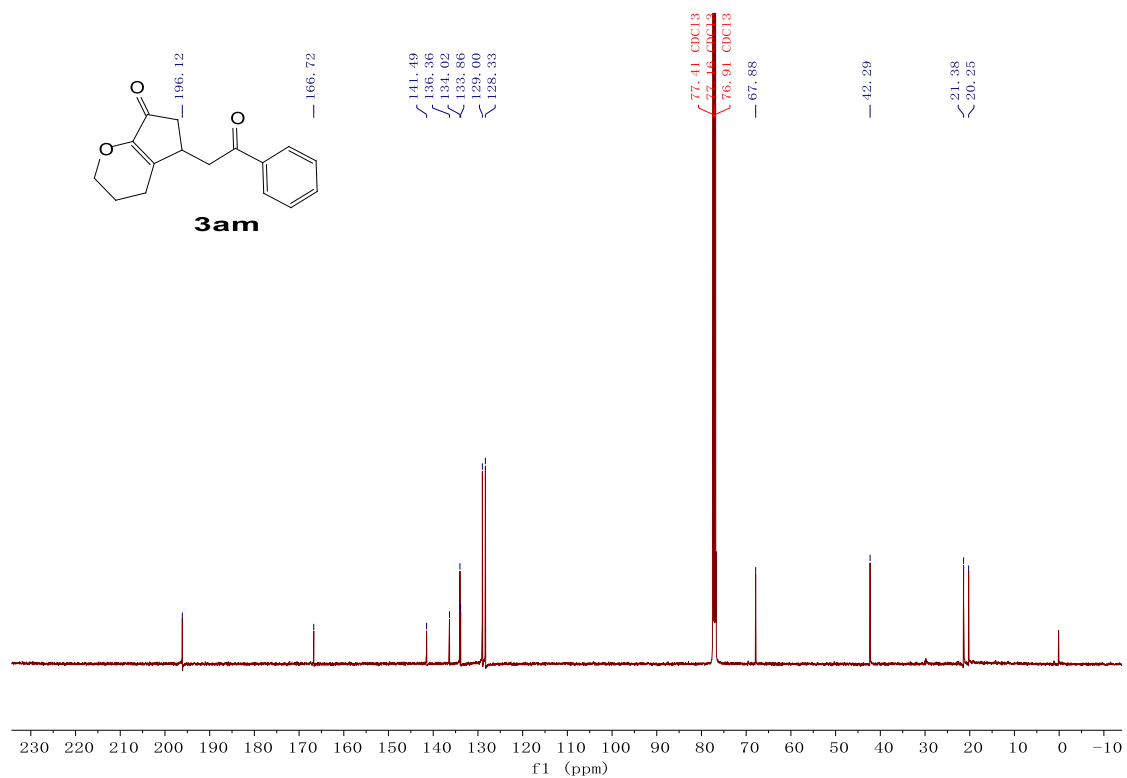



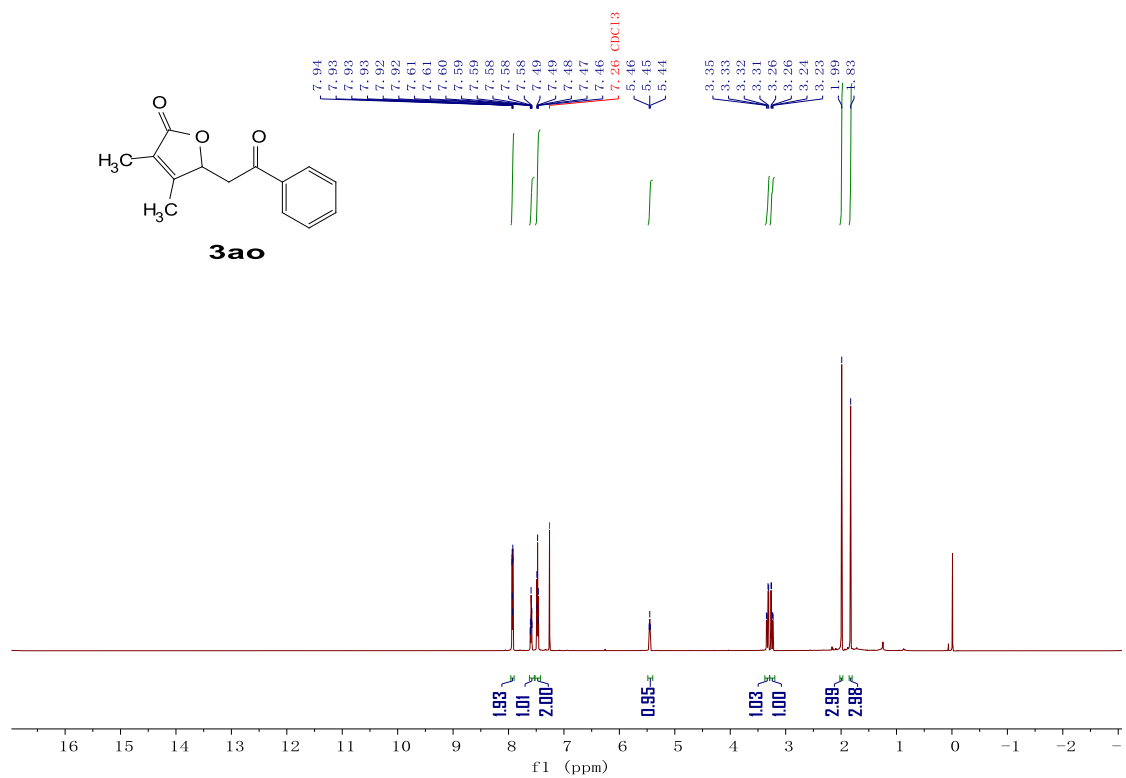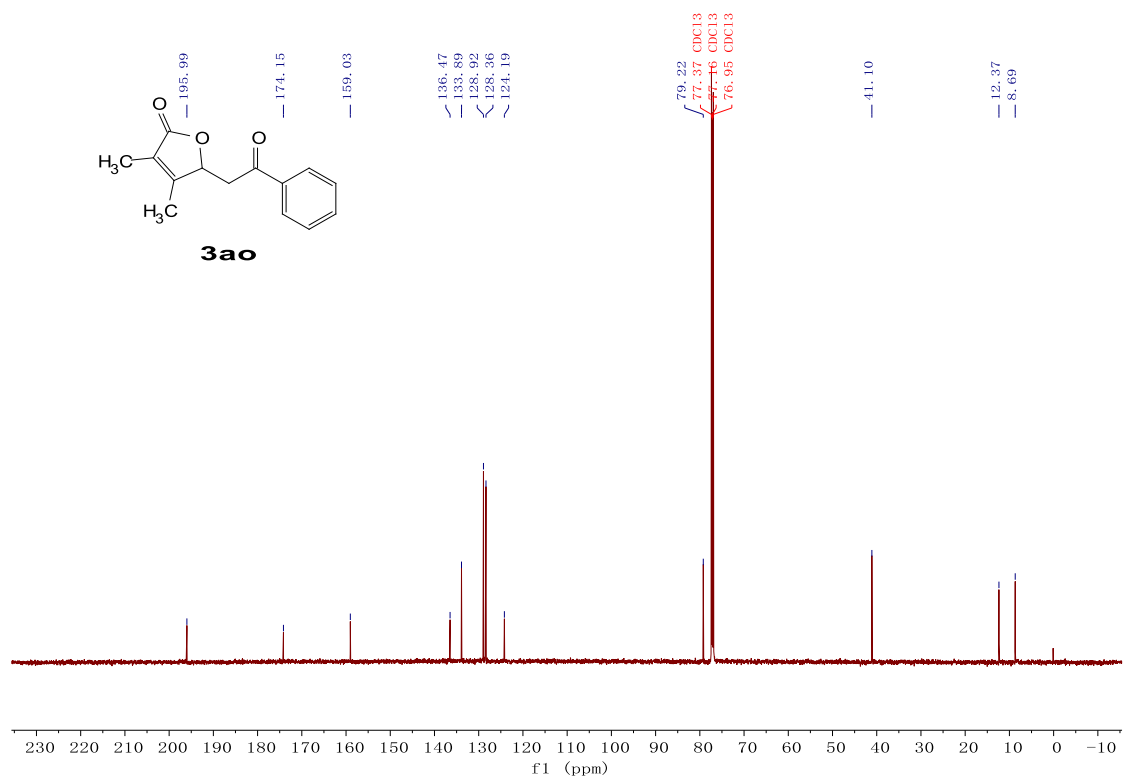

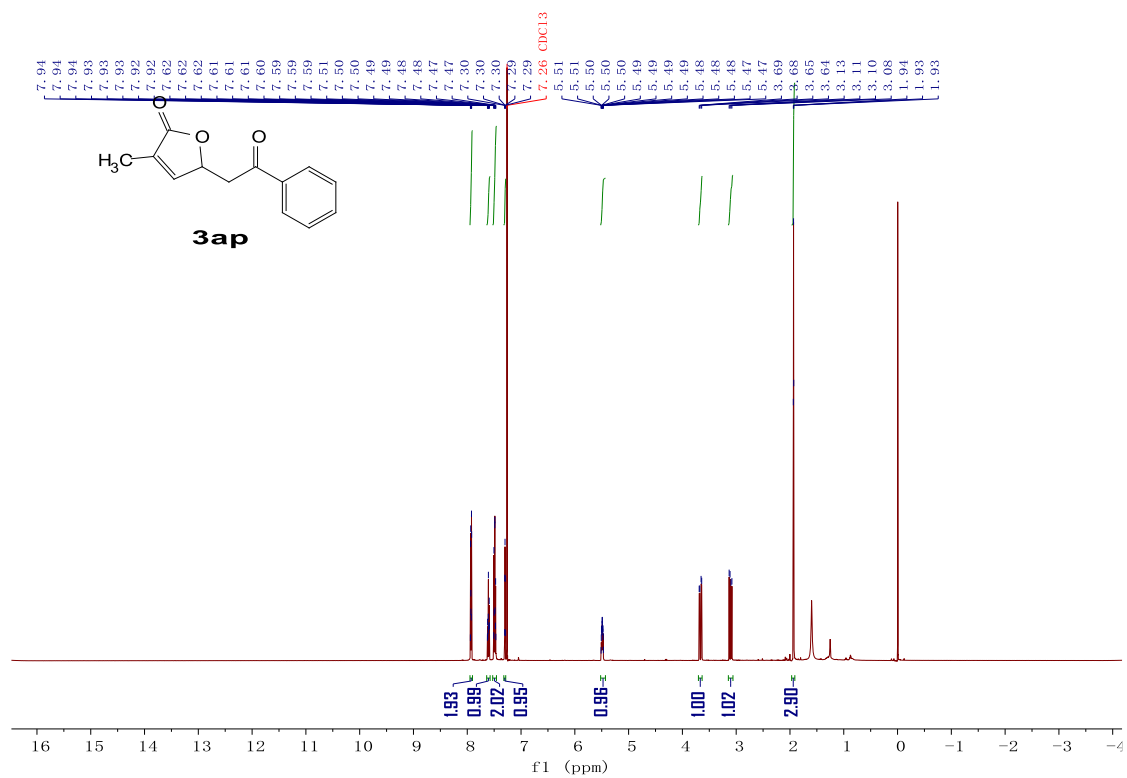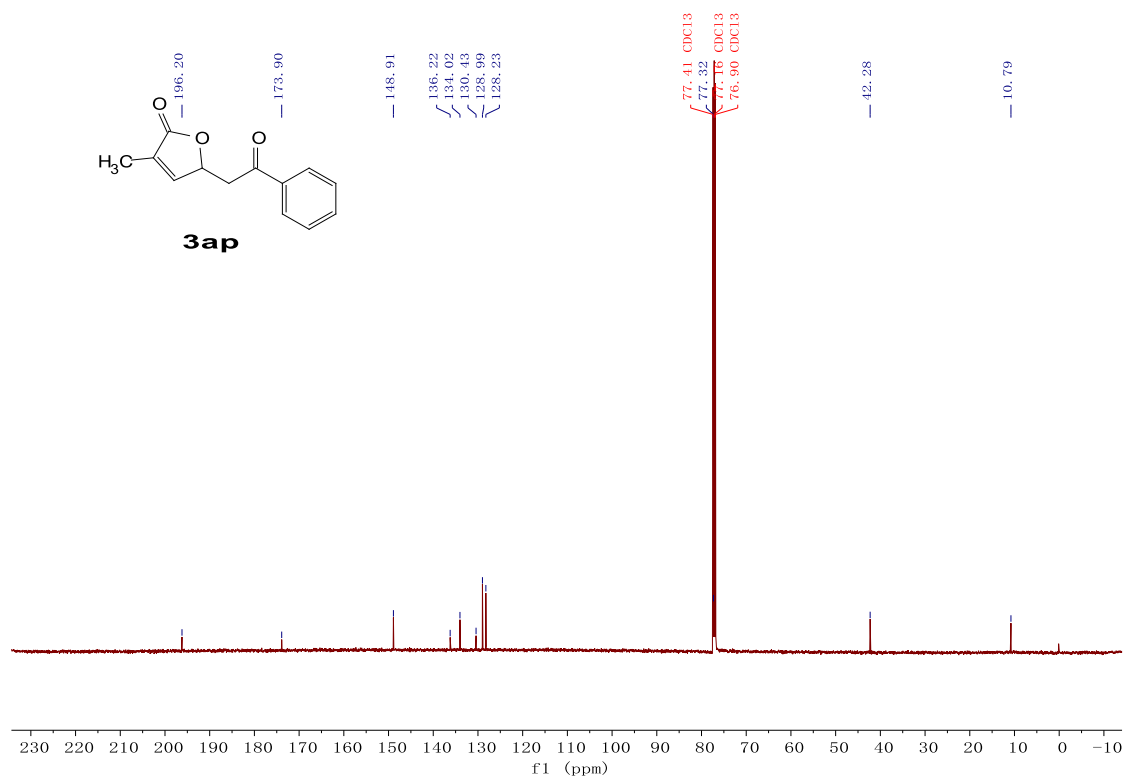

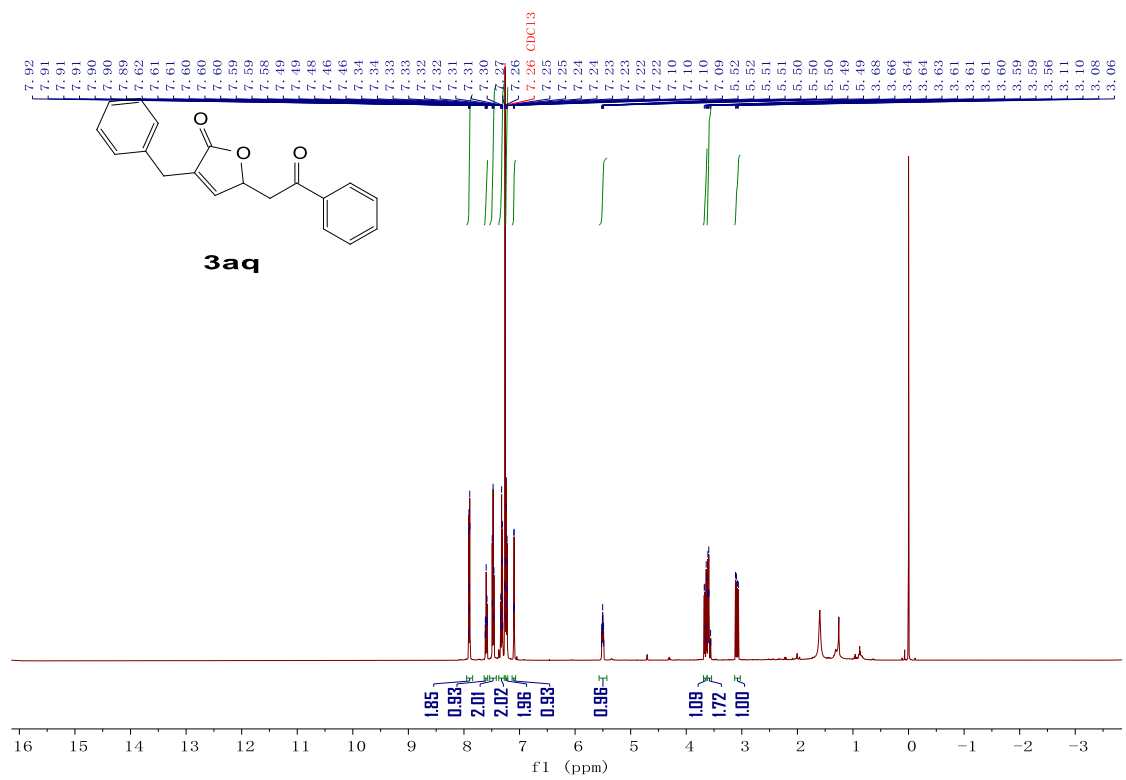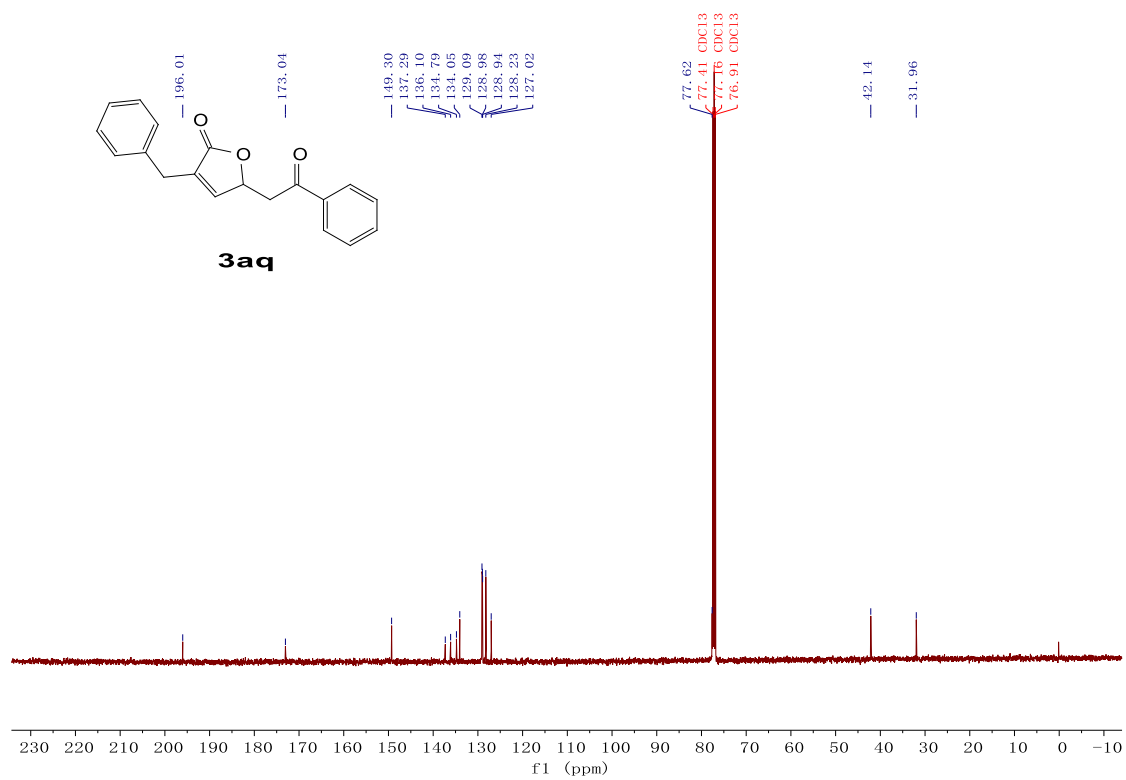

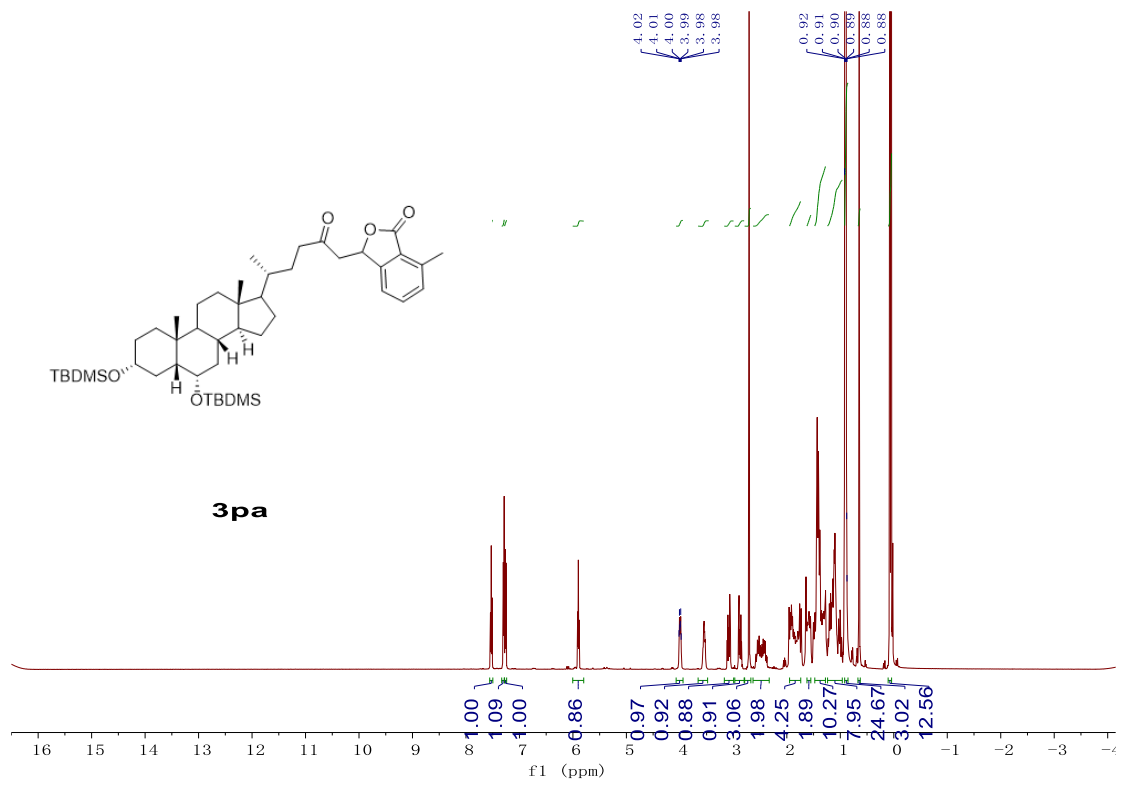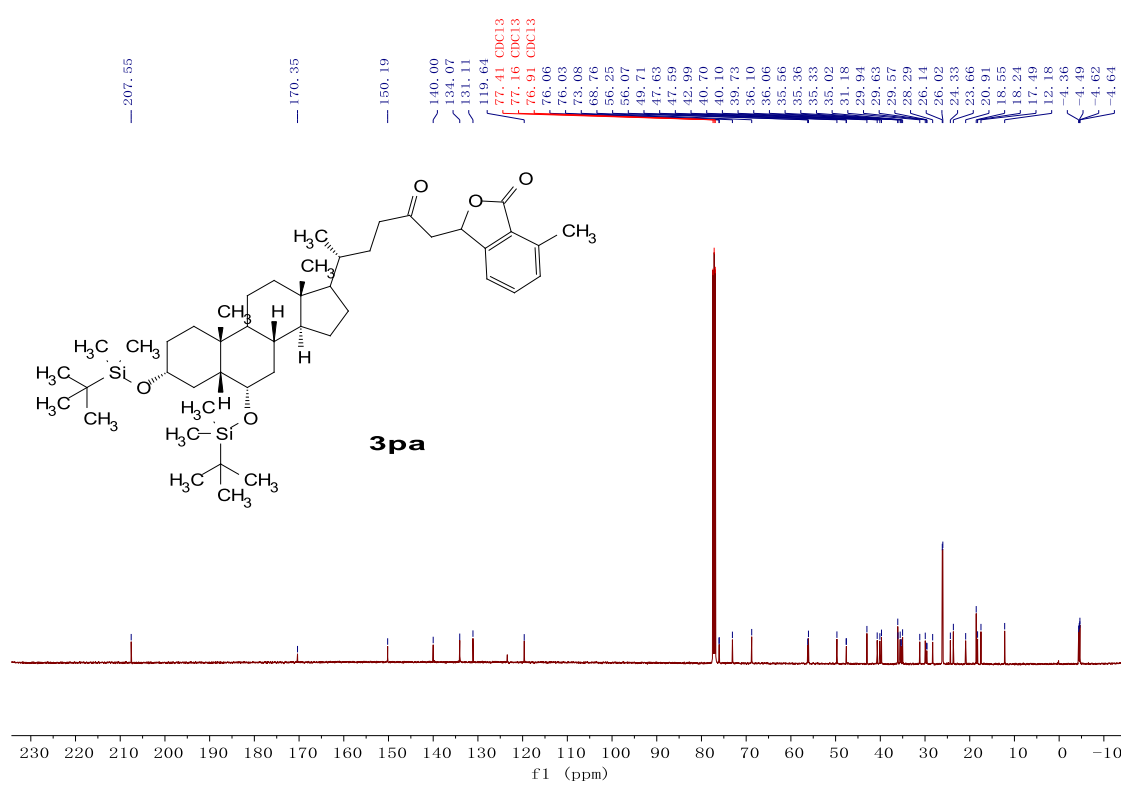



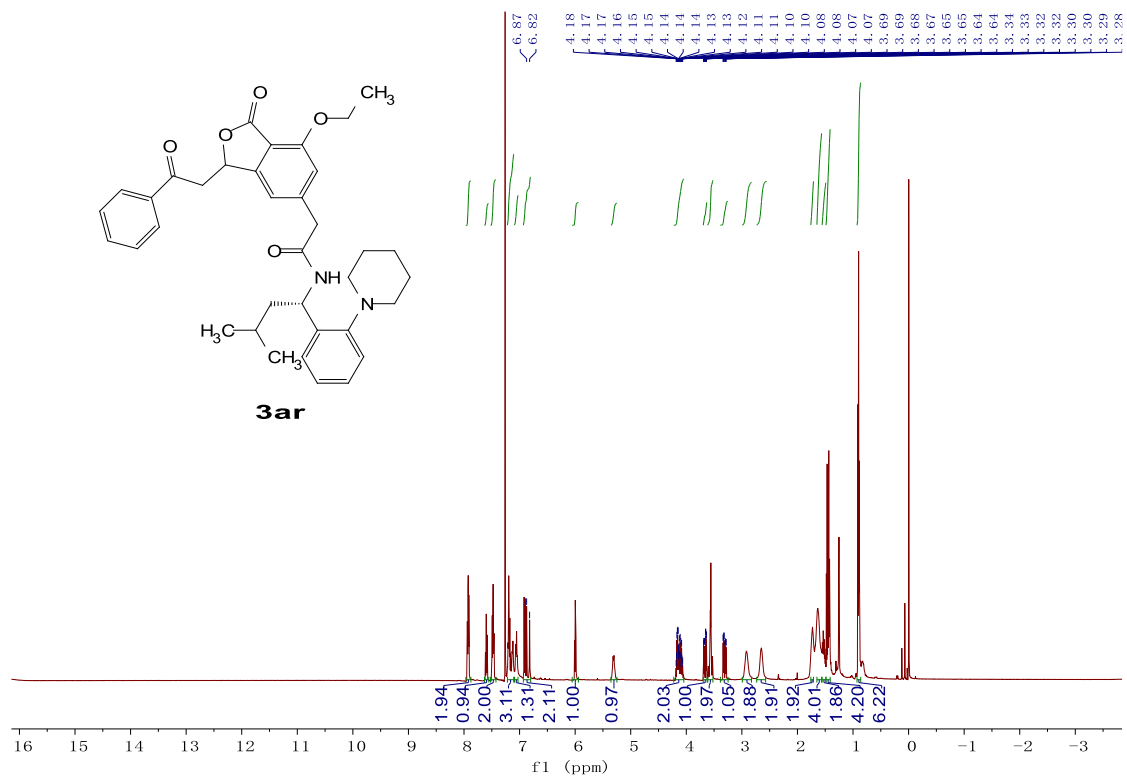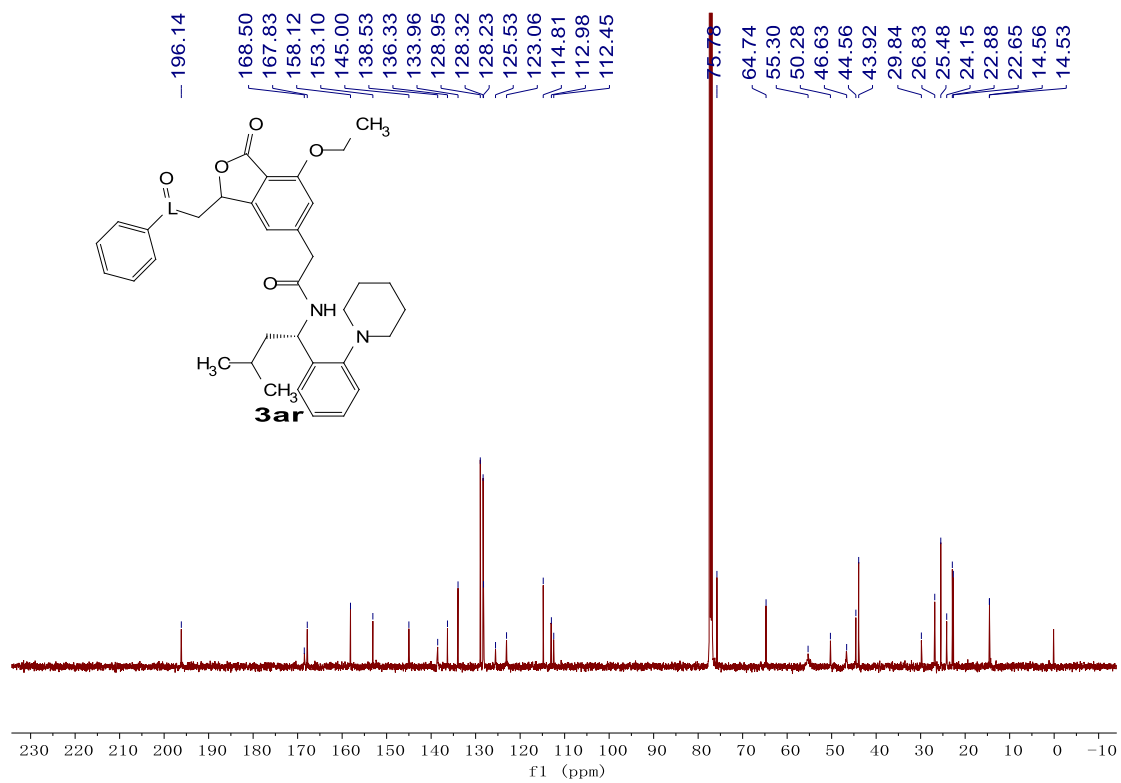

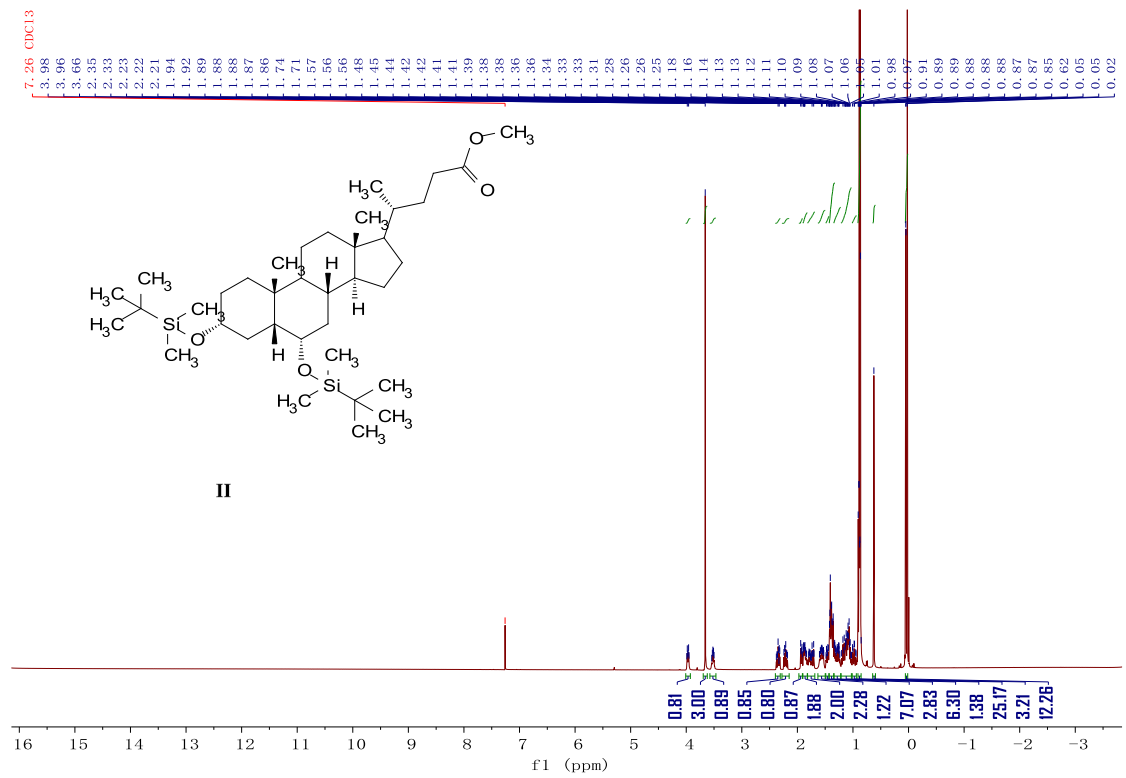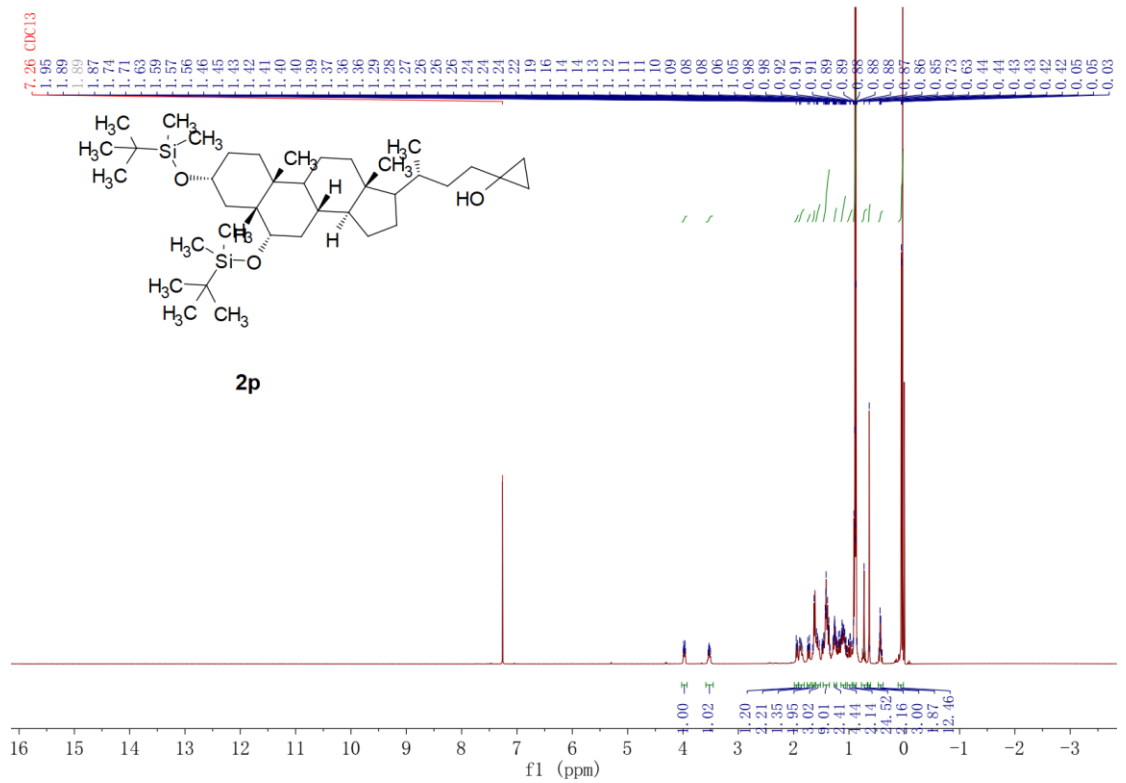

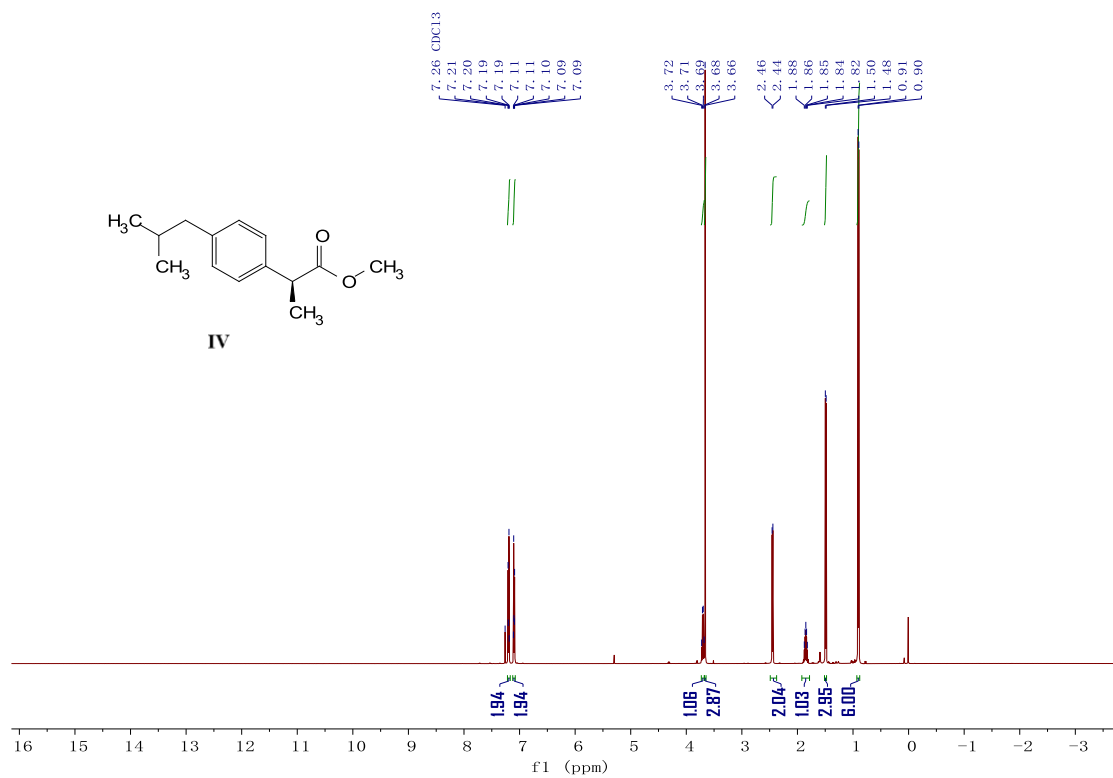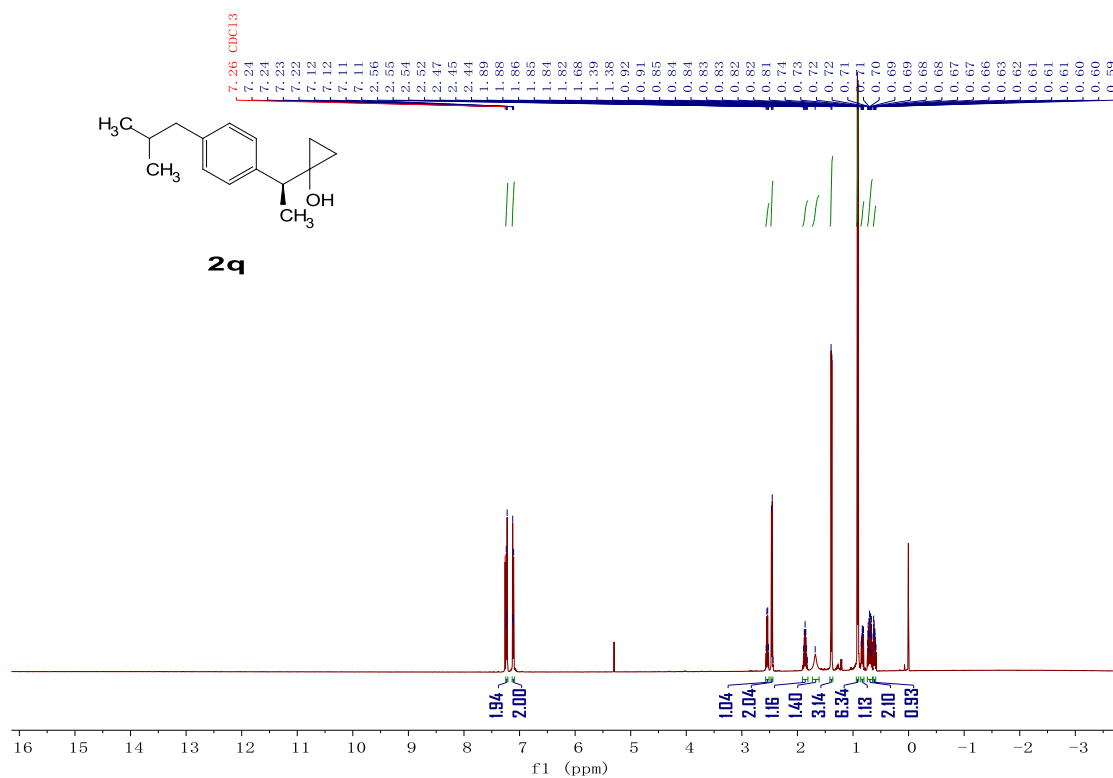

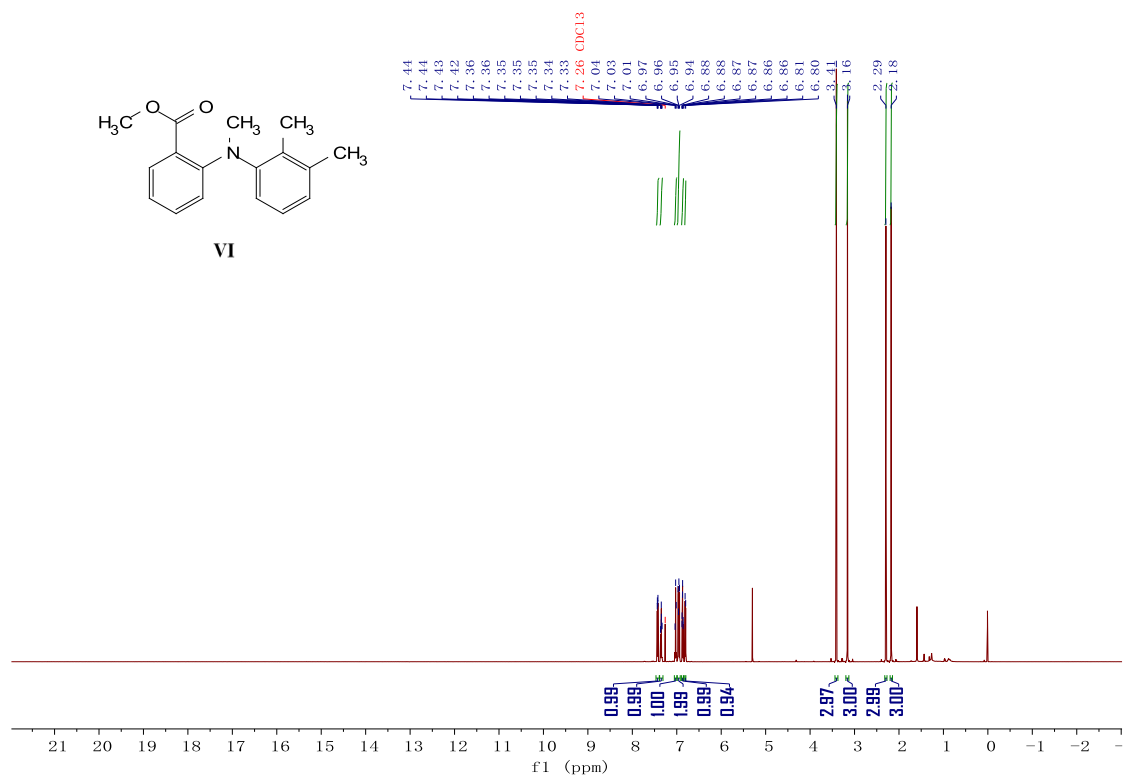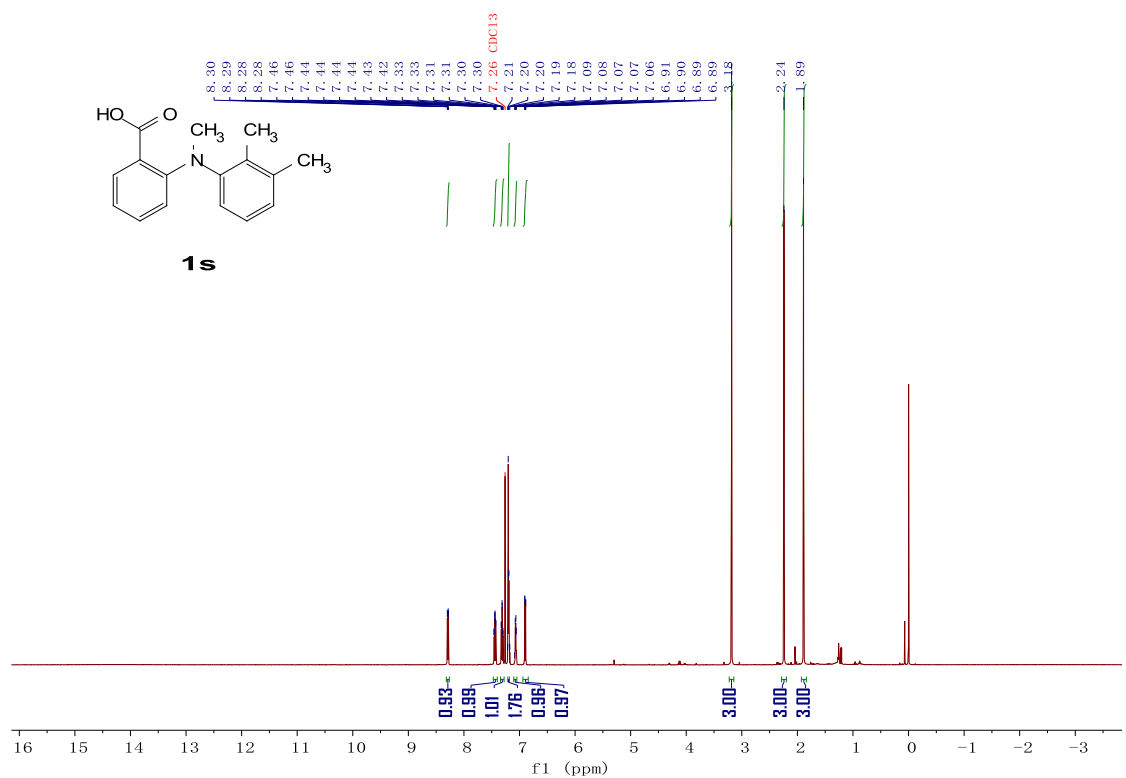

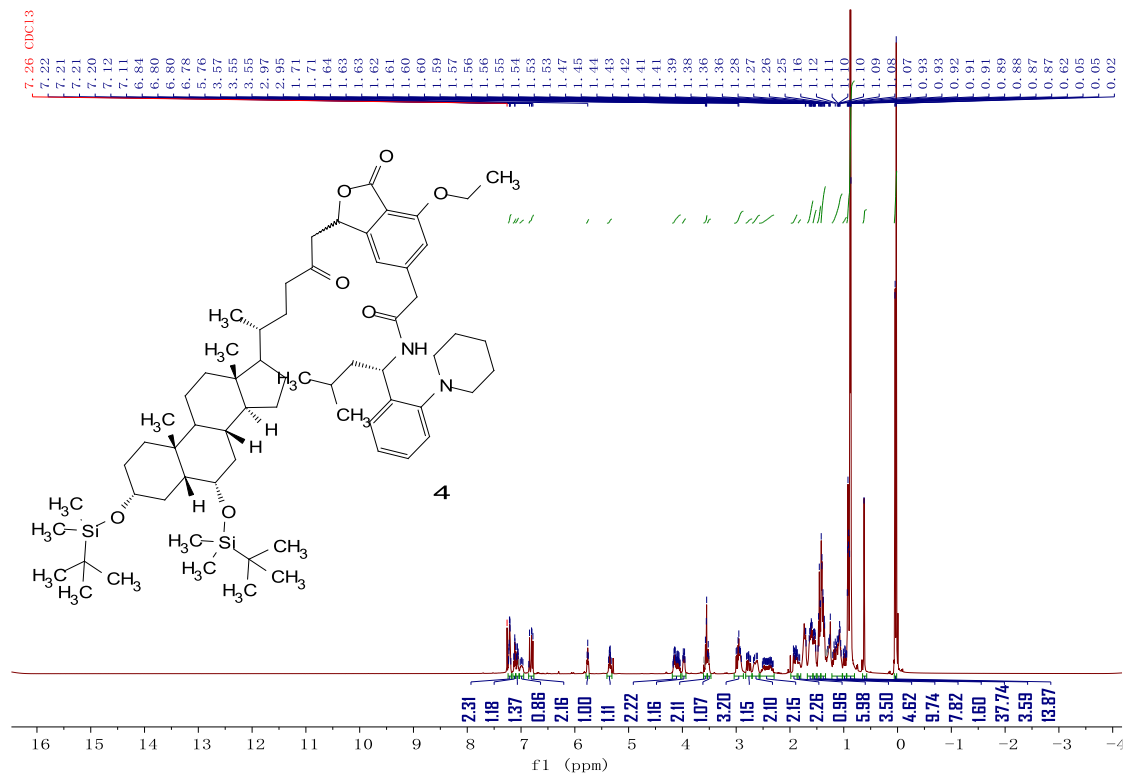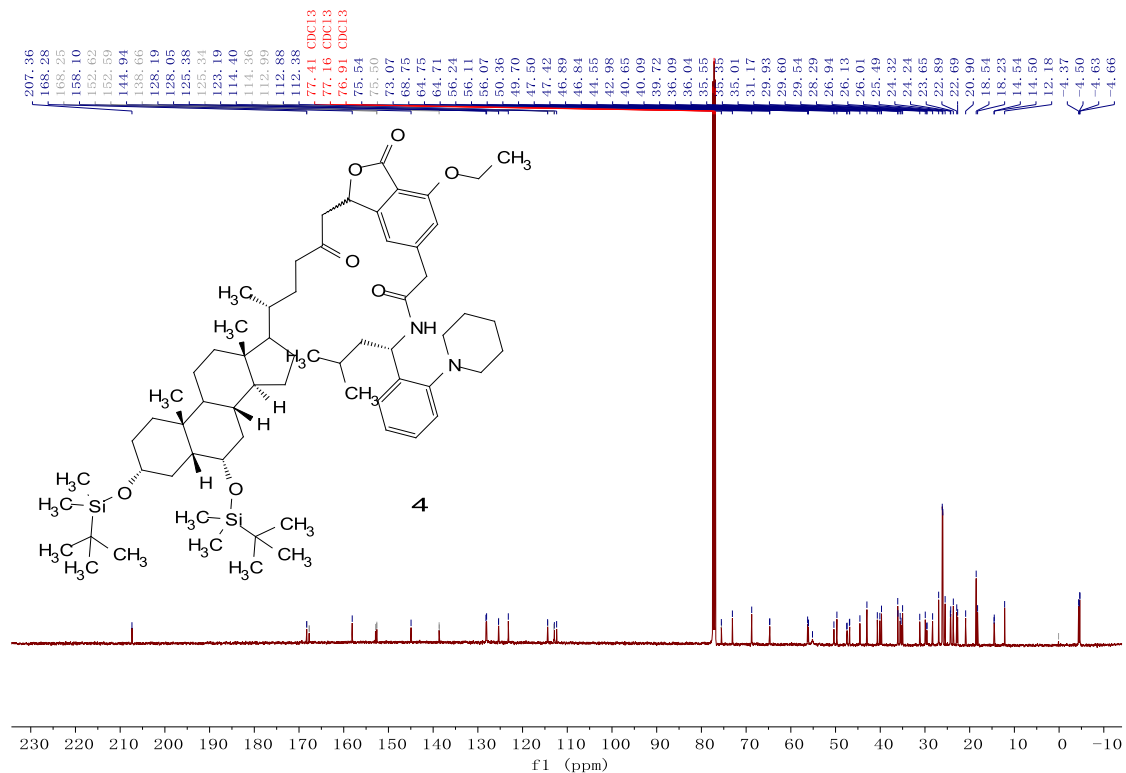

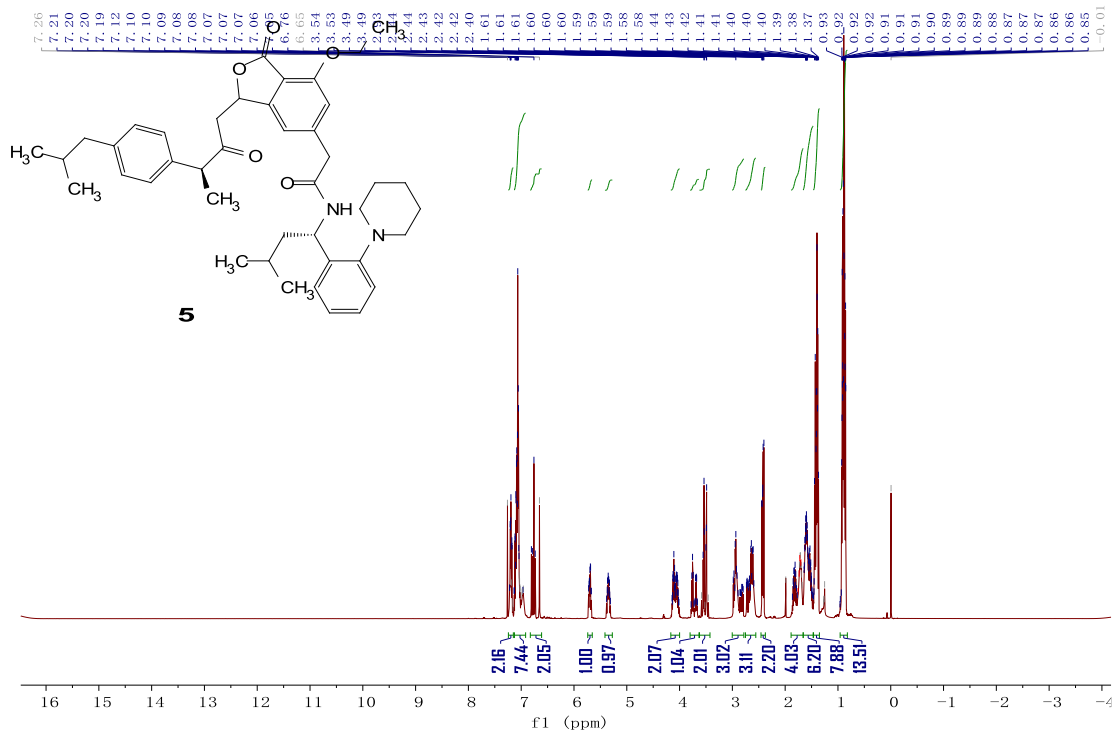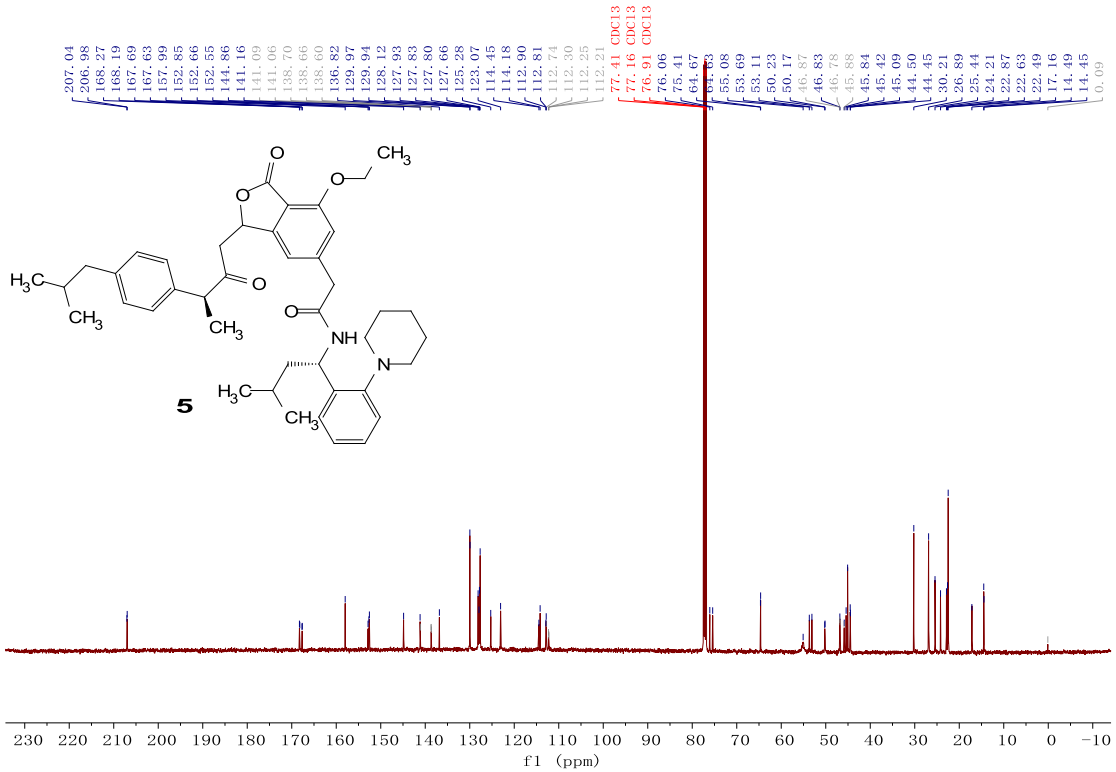

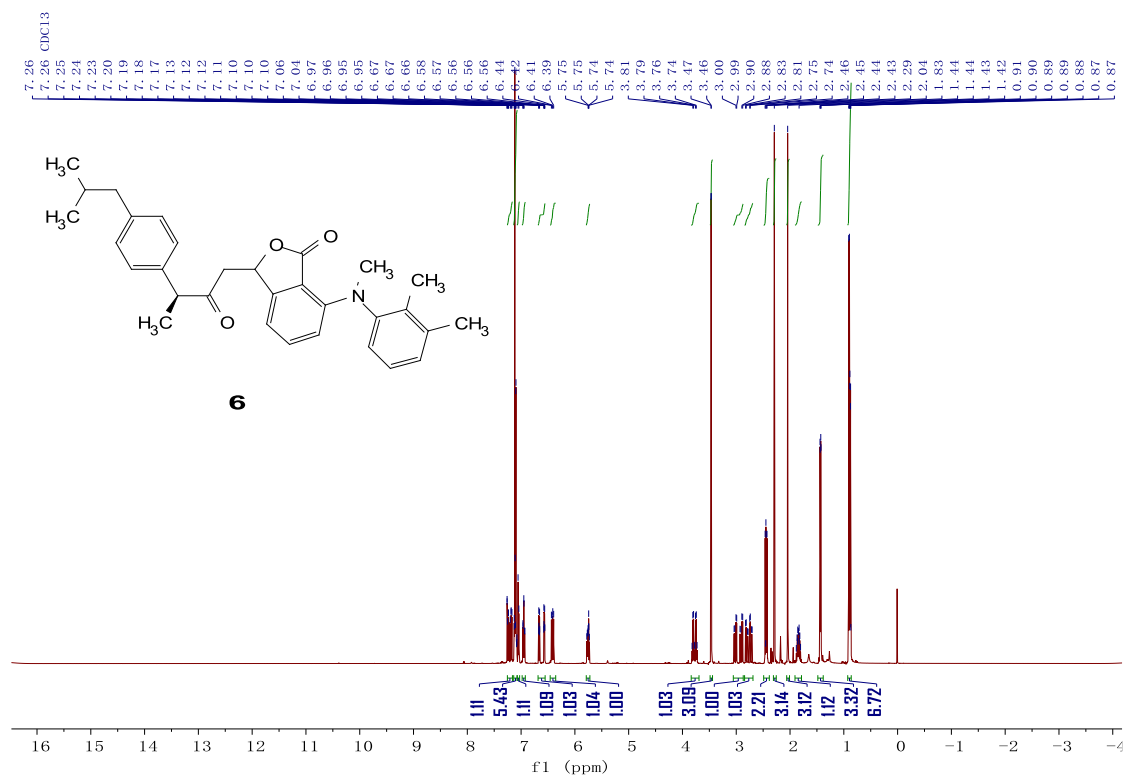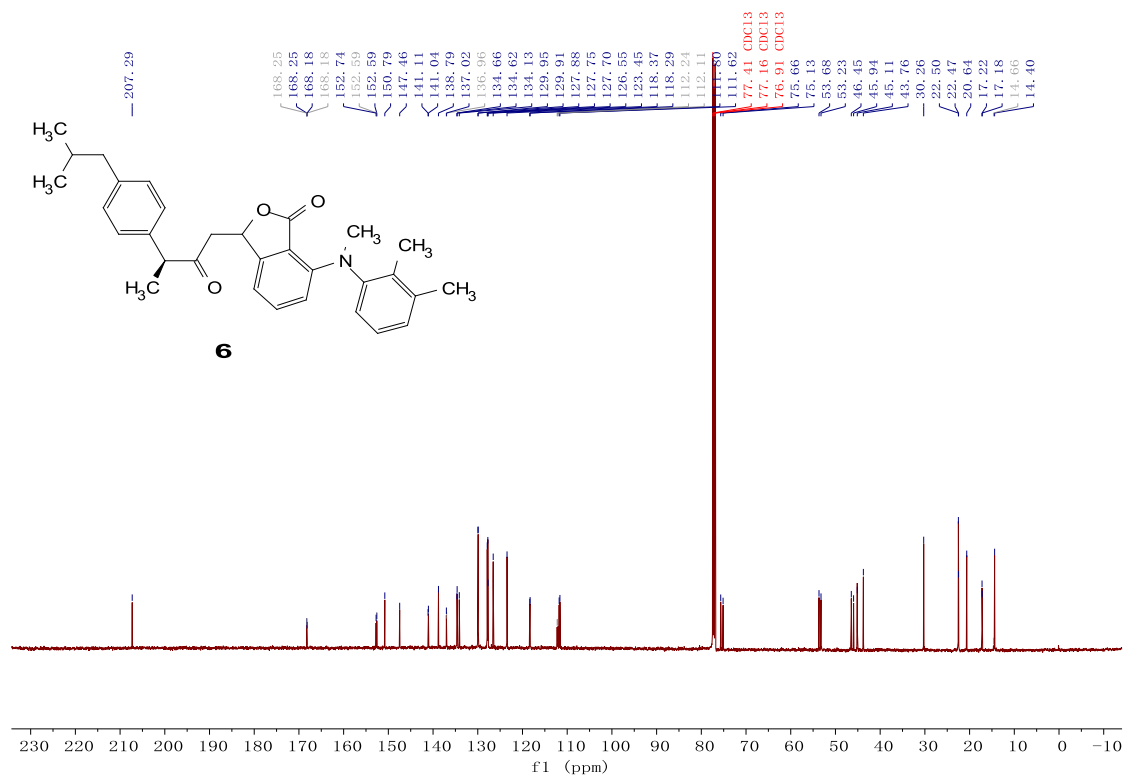

## Reference

1. Zhou, X.; Yu, S.; Kong, L.; Li, X., Rhodium(III)-Catalyzed Coupling of Arenes with Cyclopropanols via C–H Activation and Ring Opening. *ACS Catal.* **2016**, *6*, 647-651.
